# Supplementary material for: Transcriptomic Analysis Reveals the Involvement of lncRNA–miRNA–mRNA Networks in Hair Follicle Induction in Aohan Fine Wool Sheep Skin
Source: Front Genet. 2020 Jun 9;11:590. doi: 10.3389/fgene.2020.00590 (PMC7528302; doi:10.3389/fgene.2020.00590)
Supplement: TABLE S2 — Target mRNA prediction (cis and trans) of lncRNA. [file Table_2.XLSX]

## Sheet: Birth-E90d
Prediction results of cis target of differentially expressed lncRNA in Birth-E90d
Lnc_id	Target gene_id	Distance
MSTRG.653547	gene25785	29769
MSTRG.571405	gene21914	48957
MSTRG.571405	gene21913	45685
MSTRG.503565	gene19256	4139
MSTRG.7361	gene402	6354
MSTRG.7361	gene403	20059
MSTRG.249151	gene9250	26164
MSTRG.191391	gene6740	45075
MSTRG.191391	gene6737	6035
MSTRG.191391	gene6736	4531
MSTRG.191391	gene6735	17154
MSTRG.191391	gene6734	19756
MSTRG.191391	gene6733	33506
MSTRG.191391	gene6739	42689
MSTRG.191391	gene6738	24809
MSTRG.674621	gene26781	30908
MSTRG.674621	gene26782	46326
MSTRG.623700	gene24652	11399
MSTRG.535466	gene20592	1328
MSTRG.652474	gene25748	9043
MSTRG.191433	gene6746	47389
MSTRG.191433	gene6744	14898
MSTRG.191433	gene6745	38286
MSTRG.191433	gene6743	3198
MSTRG.191433	gene6740	15449
MSTRG.191433	gene6741	14703
MSTRG.191433	gene6739	31093
MSTRG.191433	gene6738	49557
MSTRG.357836	gene12842	14856
MSTRG.170996	gene5934	48650
MSTRG.170996	gene5935	16808
MSTRG.17509	gene670	18163
MSTRG.722949	gene28354	38631
MSTRG.722949	gene28352	37026
MSTRG.722949	gene28353	398
MSTRG.41591	gene1764	25183
MSTRG.41591	gene1763	24422
MSTRG.450850	gene16489	11600
MSTRG.450850	gene16488	42396
MSTRG.714796	gene28068	27736
MSTRG.714796	gene28066	16505
MSTRG.714796	gene28069	42328
MSTRG.714796	gene28067	1190
MSTRG.503581	gene19256	28943
gene18013	gene18012	36536
gene18013	gene18014	1320
gene18015	gene18012	43020
gene18015	gene18014	7
MSTRG.531038	gene20514	6502
MSTRG.7071	gene390	15746
MSTRG.7071	gene391	42709
MSTRG.7071	gene389	5989
MSTRG.596749	gene23029	6603
MSTRG.382711	gene13509	2195
MSTRG.382711	gene13510	28302
MSTRG.35463	gene1706	13287
Prediction results of trans target of differentially expressed lncRNA in Birth-E90d
LncRNA	Gene_id	Correlation
MSTRG.122243	gene12758	-0.9574
MSTRG.122243	gene22074	-0.9574
MSTRG.122243	gene2261	-0.9574
MSTRG.122243	gene9805	-0.9574
MSTRG.170996	gene10445	-0.9667
MSTRG.170996	gene11706	-0.9667
MSTRG.170996	gene13167	0.95
MSTRG.170996	gene13700	-0.9667
MSTRG.170996	gene13716	-0.95
MSTRG.170996	gene13879	-0.95
MSTRG.170996	gene14936	0.9833
MSTRG.170996	gene16327	-0.9667
MSTRG.170996	gene19113	0.9667
MSTRG.170996	gene21683	-0.9667
MSTRG.170996	gene21718	-0.9667
MSTRG.170996	gene25148	0.9667
MSTRG.170996	gene27430	0.9667
MSTRG.170996	gene2914	-0.9833
MSTRG.170996	gene3138	-0.95
MSTRG.170996	gene4713	-1
MSTRG.170996	gene5992	-0.9833
MSTRG.170996	gene9265	0.9833
MSTRG.17509	gene10445	-0.9667
MSTRG.17509	gene11706	-0.9667
MSTRG.17509	gene13716	-0.95
MSTRG.17509	gene15885	-0.95
MSTRG.17509	gene17938	0.95
MSTRG.17509	gene21502	-0.9667
MSTRG.17509	gene25148	0.9667
MSTRG.17509	gene27430	0.95
MSTRG.17509	gene27742	0.9667
MSTRG.17509	gene2914	-0.9833
MSTRG.17509	gene3138	-0.95
MSTRG.17509	gene4713	-0.9667
MSTRG.17509	gene5992	-0.95
MSTRG.17509	gene9265	0.9833
MSTRG.17509	gene9805	-0.95
MSTRG.188014	gene1133	-0.9667
MSTRG.188014	gene11735	-0.9667
MSTRG.188014	gene12001	-0.9667
MSTRG.188014	gene13423	-0.9833
MSTRG.188014	gene14103	-0.95
MSTRG.188014	gene18030	0.95
MSTRG.188014	gene19805	-0.9833
MSTRG.188014	gene2052	-0.95
MSTRG.188014	gene23370	0.95
MSTRG.188014	gene25981	0.9667
MSTRG.188014	gene27776	-0.9667
MSTRG.188014	gene28181	-0.9667
MSTRG.188014	gene5639	-0.95
MSTRG.188014	gene6966	-0.9667
MSTRG.188014	gene824	0.95
MSTRG.188014	gene9378	-0.95
MSTRG.191433	gene10640	-0.9574
MSTRG.191433	gene11706	-0.9574
MSTRG.191433	gene11844	-0.9574
MSTRG.191433	gene17027	0.9574
MSTRG.191433	gene19564	0.9574
MSTRG.191433	gene25148	0.9574
MSTRG.191433	gene2914	-0.9574
MSTRG.191433	gene9265	0.9574
MSTRG.207595	gene12408	-0.9624
MSTRG.207595	gene14299	0.9791
MSTRG.207595	gene5433	0.9791
MSTRG.207595	gene7815	-0.9791
MSTRG.207595	gene8317	0.9791
MSTRG.212277	gene10721	0.95
MSTRG.212277	gene11273	0.95
MSTRG.212277	gene11800	-0.9667
MSTRG.212277	gene13129	0.95
MSTRG.212277	gene17187	0.95
MSTRG.212277	gene18174	-0.95
MSTRG.212277	gene196	-0.9667
MSTRG.212277	gene19718	0.9667
MSTRG.212277	gene20534	0.95
MSTRG.212277	gene20596	0.95
MSTRG.212277	gene20672	0.9667
MSTRG.212277	gene22217	0.95
MSTRG.212277	gene24741	0.9833
MSTRG.212277	gene24917	0.9833
MSTRG.212277	gene26063	-0.9667
MSTRG.212277	gene27467	-0.95
MSTRG.212277	gene28085	0.9667
MSTRG.212277	gene4181	0.9667
MSTRG.212277	gene5194	-0.9667
MSTRG.212277	gene5986	-0.95
MSTRG.212277	gene6142	0.95
MSTRG.212277	gene7933	-0.95
MSTRG.212277	gene8670	0.95
MSTRG.212277	gene9531	0.95
MSTRG.217423	gene10425	-0.95
MSTRG.217423	gene10459	-0.9667
MSTRG.217423	gene11143	0.95
MSTRG.217423	gene13569	0.95
MSTRG.217423	gene14367	-0.95
MSTRG.217423	gene14448	-0.95
MSTRG.217423	gene17034	-0.9833
MSTRG.217423	gene18649	0.9833
MSTRG.217423	gene20509	-0.9667
MSTRG.217423	gene20521	1
MSTRG.217423	gene22005	-0.9667
MSTRG.217423	gene22505	0.9667
MSTRG.217423	gene2305	-0.9667
MSTRG.217423	gene23924	0.9667
MSTRG.217423	gene24741	0.9667
MSTRG.217423	gene24814	0.9667
MSTRG.217423	gene24917	0.9667
MSTRG.217423	gene3058	0.95
MSTRG.217423	gene4015	-0.9667
MSTRG.217423	gene9985	-0.9667
MSTRG.222159	gene10268	0.9667
MSTRG.222159	gene10459	-0.9667
MSTRG.222159	gene11143	0.95
MSTRG.222159	gene11228	0.9667
MSTRG.222159	gene11640	0.95
MSTRG.222159	gene11709	0.95
MSTRG.222159	gene12711	0.9833
MSTRG.222159	gene13410	0.95
MSTRG.222159	gene13448	0.95
MSTRG.222159	gene13569	1
MSTRG.222159	gene13712	0.9833
MSTRG.222159	gene13731	0.95
MSTRG.222159	gene13919	0.9833
MSTRG.222159	gene14244	0.9667
MSTRG.222159	gene14726	0.9833
MSTRG.222159	gene14730	0.9667
MSTRG.222159	gene16188	-0.95
MSTRG.222159	gene16365	0.9667
MSTRG.222159	gene16811	0.9833
MSTRG.222159	gene17707	0.95
MSTRG.222159	gene17894	0.95
MSTRG.222159	gene20095	0.9667
MSTRG.222159	gene20509	-0.9667
MSTRG.222159	gene20521	0.95
MSTRG.222159	gene22212	0.95
MSTRG.222159	gene2233	0.9667
MSTRG.222159	gene22505	0.9667
MSTRG.222159	gene23358	0.9833
MSTRG.222159	gene23890	0.9667
MSTRG.222159	gene24078	0.95
MSTRG.222159	gene24814	0.9667
MSTRG.222159	gene2518	0.95
MSTRG.222159	gene25403	0.95
MSTRG.222159	gene26079	-0.9667
MSTRG.222159	gene26594	-0.9667
MSTRG.222159	gene27230	-0.9667
MSTRG.222159	gene3408	-0.9667
MSTRG.222159	gene366	0.9833
MSTRG.222159	gene4015	-0.9667
MSTRG.222159	gene4410	-0.95
MSTRG.222159	gene5891	-0.9833
MSTRG.222159	gene592	-0.9667
MSTRG.222159	gene7311	0.95
MSTRG.222159	gene7888	0.95
MSTRG.222159	gene9835	-0.95
MSTRG.223128	gene20377	0.9574
MSTRG.223128	gene25962	-0.9574
MSTRG.249151	gene11706	-0.95
MSTRG.249151	gene20672	0.95
MSTRG.249151	gene2760	0.9667
MSTRG.249151	gene3510	0.95
MSTRG.249151	gene4549	-0.95
MSTRG.35463	gene10066	0.95
MSTRG.35463	gene10217	0.95
MSTRG.35463	gene10313	-0.9667
MSTRG.35463	gene10513	0.95
MSTRG.35463	gene10823	0.9667
MSTRG.35463	gene11633	0.95
MSTRG.35463	gene11879	-0.95
MSTRG.35463	gene11953	-0.95
MSTRG.35463	gene11993	-0.9667
MSTRG.35463	gene12406	-0.95
MSTRG.35463	gene12412	0.95
MSTRG.35463	gene12459	-0.95
MSTRG.35463	gene13270	0.95
MSTRG.35463	gene13319	0.9833
MSTRG.35463	gene14298	0.95
MSTRG.35463	gene14531	0.95
MSTRG.35463	gene1460	0.95
MSTRG.35463	gene14648	0.95
MSTRG.35463	gene15049	0.9667
MSTRG.35463	gene15050	0.95
MSTRG.35463	gene15056	0.9667
MSTRG.35463	gene15071	0.95
MSTRG.35463	gene15849	-0.95
MSTRG.35463	gene15905	0.9833
MSTRG.35463	gene16658	0.9667
MSTRG.35463	gene16946	0.9833
MSTRG.35463	gene1707	0.9667
MSTRG.35463	gene1714	0.95
MSTRG.35463	gene17771	0.95
MSTRG.35463	gene18581	0.9833
MSTRG.35463	gene20184	0.95
MSTRG.35463	gene20213	0.9833
MSTRG.35463	gene20310	-0.9667
MSTRG.35463	gene20584	-0.9833
MSTRG.35463	gene20585	0.95
MSTRG.35463	gene20897	-0.95
MSTRG.35463	gene20904	-0.9833
MSTRG.35463	gene21508	0.9833
MSTRG.35463	gene21579	-0.9833
MSTRG.35463	gene22777	0.9667
MSTRG.35463	gene23705	0.95
MSTRG.35463	gene23763	0.9667
MSTRG.35463	gene24235	0.95
MSTRG.35463	gene24330	0.95
MSTRG.35463	gene2457	-0.9667
MSTRG.35463	gene25201	0.95
MSTRG.35463	gene25292	-0.95
MSTRG.35463	gene2567	-0.95
MSTRG.35463	gene26284	0.95
MSTRG.35463	gene27007	0.95
MSTRG.35463	gene27242	0.95
MSTRG.35463	gene27783	-0.95
MSTRG.35463	gene28319	0.95
MSTRG.35463	gene3073	-0.95
MSTRG.35463	gene3092	-0.9833
MSTRG.35463	gene4319	0.95
MSTRG.35463	gene4419	-0.9667
MSTRG.35463	gene4421	-0.95
MSTRG.35463	gene4604	0.9667
MSTRG.35463	gene4816	0.9667
MSTRG.35463	gene572	0.9667
MSTRG.35463	gene5748	-0.9667
MSTRG.35463	gene5837	-0.95
MSTRG.35463	gene6214	-0.9833
MSTRG.35463	gene6434	-0.9667
MSTRG.35463	gene6521	0.9667
MSTRG.35463	gene6959	0.9667
MSTRG.35463	gene6965	-0.95
MSTRG.35463	gene7189	0.95
MSTRG.35463	gene7201	-0.9833
MSTRG.35463	gene7210	0.9833
MSTRG.35463	gene7255	0.9667
MSTRG.35463	gene7357	0.9667
MSTRG.35463	gene8388	-0.9667
MSTRG.35463	gene918	0.9667
MSTRG.357836	gene10425	-0.95
MSTRG.357836	gene11143	0.95
MSTRG.357836	gene13213	-0.95
MSTRG.357836	gene15830	0.9667
MSTRG.357836	gene1649	-0.95
MSTRG.357836	gene17034	-0.9667
MSTRG.357836	gene17187	0.95
MSTRG.357836	gene20521	0.95
MSTRG.357836	gene2305	-0.9833
MSTRG.357836	gene24741	0.95
MSTRG.357836	gene24917	0.95
MSTRG.357836	gene9866	0.9667
MSTRG.41591	gene19738	-0.9667
MSTRG.41591	gene7444	0.95
MSTRG.450850	gene11198	-0.954
MSTRG.450850	gene11601	-0.9624
MSTRG.450850	gene1251	-0.9707
MSTRG.450850	gene12520	-0.954
MSTRG.450850	gene12710	-0.9791
MSTRG.450850	gene13509	-0.9791
MSTRG.450850	gene13930	-0.9791
MSTRG.450850	gene14065	-0.954
MSTRG.450850	gene15846	-0.954
MSTRG.450850	gene16655	-0.954
MSTRG.450850	gene17172	-0.9707
MSTRG.450850	gene19125	-0.9624
MSTRG.450850	gene19225	0.9791
MSTRG.450850	gene19780	0.9791
MSTRG.450850	gene1987	0.954
MSTRG.450850	gene20401	0.9707
MSTRG.450850	gene21704	-0.954
MSTRG.450850	gene2512	-0.9624
MSTRG.450850	gene25130	-0.9624
MSTRG.450850	gene25203	-0.954
MSTRG.450850	gene25394	-0.9624
MSTRG.450850	gene26486	-0.9624
MSTRG.450850	gene28308	0.9624
MSTRG.450850	gene2915	-0.9624
MSTRG.450850	gene4093	0.9624
MSTRG.450850	gene4352	-0.9791
MSTRG.450850	gene441	0.9624
MSTRG.450850	gene5516	-0.9624
MSTRG.450850	gene6194	-0.9624
MSTRG.450850	gene766	0.954
MSTRG.450850	gene816	-0.954
MSTRG.450850	gene8320	-0.9624
MSTRG.450850	gene851	-0.954
MSTRG.503565	gene10414	0.9667
MSTRG.503565	gene10611	-0.9667
MSTRG.503565	gene1133	-0.95
MSTRG.503565	gene13423	-0.95
MSTRG.503565	gene13545	-0.95
MSTRG.503565	gene15034	0.9667
MSTRG.503565	gene1599	-0.9667
MSTRG.503565	gene1621	-0.95
MSTRG.503565	gene18626	-0.95
MSTRG.503565	gene24292	0.95
MSTRG.503565	gene243	-0.9667
MSTRG.503565	gene2560	0.95
MSTRG.503565	gene26598	-0.95
MSTRG.503565	gene27776	-0.95
MSTRG.503565	gene28181	-0.95
MSTRG.503565	gene28258	-0.95
MSTRG.503565	gene3726	-0.9667
MSTRG.503565	gene3983	-0.9667
MSTRG.503565	gene5435	-0.9667
MSTRG.503565	gene5639	-0.9667
MSTRG.503581	gene13664	0.9574
MSTRG.531038	gene13189	0.95
MSTRG.531038	gene13380	0.9833
MSTRG.531038	gene13509	-0.95
MSTRG.531038	gene13607	-0.9667
MSTRG.531038	gene14276	-0.95
MSTRG.531038	gene14534	-0.9667
MSTRG.531038	gene15254	0.95
MSTRG.531038	gene15937	-0.9667
MSTRG.531038	gene16553	-0.95
MSTRG.531038	gene16603	-0.95
MSTRG.531038	gene17538	-0.95
MSTRG.531038	gene21500	-0.9833
MSTRG.531038	gene21704	-0.9667
MSTRG.531038	gene22303	-0.9667
MSTRG.531038	gene24776	-0.95
MSTRG.531038	gene25754	-0.95
MSTRG.531038	gene26077	-0.9667
MSTRG.531038	gene2673	-0.9667
MSTRG.531038	gene27084	-0.9833
MSTRG.531038	gene27446	-0.9833
MSTRG.531038	gene5908	-0.9667
MSTRG.531038	gene7223	-0.95
MSTRG.531038	gene7583	-0.95
MSTRG.531038	gene766	0.9667
MSTRG.531038	gene8233	-0.9667
MSTRG.531038	gene8414	-0.95
MSTRG.535466	gene10310	1
MSTRG.535466	gene10351	0.95
MSTRG.535466	gene10603	1
MSTRG.535466	gene10889	0.95
MSTRG.535466	gene10974	0.9667
MSTRG.535466	gene11802	0.9667
MSTRG.535466	gene12491	0.95
MSTRG.535466	gene13386	-0.9667
MSTRG.535466	gene13683	0.95
MSTRG.535466	gene13806	0.9667
MSTRG.535466	gene13857	-0.9667
MSTRG.535466	gene14050	0.9667
MSTRG.535466	gene141	0.95
MSTRG.535466	gene14176	0.95
MSTRG.535466	gene15037	-0.95
MSTRG.535466	gene15039	-0.95
MSTRG.535466	gene15069	-0.95
MSTRG.535466	gene152	0.9667
MSTRG.535466	gene16693	0.95
MSTRG.535466	gene17198	-0.95
MSTRG.535466	gene17655	-0.95
MSTRG.535466	gene1925	0.95
MSTRG.535466	gene19362	0.9833
MSTRG.535466	gene20387	0.9667
MSTRG.535466	gene20592	0.9667
MSTRG.535466	gene209	0.95
MSTRG.535466	gene22396	-0.95
MSTRG.535466	gene22972	0.95
MSTRG.535466	gene2464	-0.95
MSTRG.535466	gene24666	-0.95
MSTRG.535466	gene25852	-0.95
MSTRG.535466	gene26592	-0.9833
MSTRG.535466	gene26685	0.95
MSTRG.535466	gene26784	0.95
MSTRG.535466	gene27150	0.9833
MSTRG.535466	gene27959	-0.95
MSTRG.535466	gene28068	-0.95
MSTRG.535466	gene2928	0.9667
MSTRG.535466	gene3293	-0.95
MSTRG.535466	gene3528	0.9667
MSTRG.535466	gene3543	0.95
MSTRG.535466	gene359	0.95
MSTRG.535466	gene389	-0.9667
MSTRG.535466	gene4103	0.95
MSTRG.535466	gene435	0.95
MSTRG.535466	gene5182	0.95
MSTRG.535466	gene5406	0.9667
MSTRG.535466	gene5863	0.95
MSTRG.535466	gene6291	-0.95
MSTRG.535466	gene748	0.9667
MSTRG.538872	gene10201	-0.954
MSTRG.538872	gene10853	-0.954
MSTRG.538872	gene11001	-0.9791
MSTRG.538872	gene11638	0.954
MSTRG.538872	gene11888	-0.9791
MSTRG.538872	gene11916	0.9791
MSTRG.538872	gene12746	-0.9791
MSTRG.538872	gene12753	-0.9791
MSTRG.538872	gene13189	0.9958
MSTRG.538872	gene13380	0.9791
MSTRG.538872	gene13607	-0.9791
MSTRG.538872	gene1362	-0.9624
MSTRG.538872	gene14276	-0.9958
MSTRG.538872	gene14534	-0.9791
MSTRG.538872	gene15276	-0.9791
MSTRG.538872	gene15796	0.9624
MSTRG.538872	gene15937	-0.9791
MSTRG.538872	gene16553	-0.9624
MSTRG.538872	gene16603	-0.9624
MSTRG.538872	gene16715	-0.9624
MSTRG.538872	gene17068	-0.9624
MSTRG.538872	gene18673	-0.9624
MSTRG.538872	gene20155	-0.9624
MSTRG.538872	gene20199	0.9624
MSTRG.538872	gene20808	0.9624
MSTRG.538872	gene20944	-0.9624
MSTRG.538872	gene2095	-0.9624
MSTRG.538872	gene20965	-0.954
MSTRG.538872	gene20975	-0.954
MSTRG.538872	gene21079	-0.9624
MSTRG.538872	gene21518	-0.9624
MSTRG.538872	gene21704	-0.9624
MSTRG.538872	gene21722	-0.9624
MSTRG.538872	gene21792	-0.9791
MSTRG.538872	gene2226	-0.9791
MSTRG.538872	gene23580	-0.9624
MSTRG.538872	gene23808	-0.9624
MSTRG.538872	gene23843	0.9624
MSTRG.538872	gene24761	-0.9791
MSTRG.538872	gene24776	-0.9958
MSTRG.538872	gene24995	-0.9624
MSTRG.538872	gene25232	-0.9624
MSTRG.538872	gene25884	0.9624
MSTRG.538872	gene26551	-0.9791
MSTRG.538872	gene26894	-0.9624
MSTRG.538872	gene27446	-0.9791
MSTRG.538872	gene27682	-0.954
MSTRG.538872	gene28269	-0.9624
MSTRG.538872	gene2958	-0.9791
MSTRG.538872	gene3133	0.9624
MSTRG.538872	gene3715	-0.9624
MSTRG.538872	gene379	-0.9791
MSTRG.538872	gene3795	-0.9791
MSTRG.538872	gene4275	0.9791
MSTRG.538872	gene5513	-0.9624
MSTRG.538872	gene5526	0.9791
MSTRG.538872	gene5908	-0.9791
MSTRG.538872	gene7024	-0.9624
MSTRG.538872	gene7223	-0.9624
MSTRG.538872	gene766	0.9624
MSTRG.538872	gene8699	0.9791
MSTRG.538872	gene870	-0.9791
MSTRG.542315	gene19043	-0.9574
MSTRG.542315	gene23362	0.9574
MSTRG.571405	gene10195	0.9667
MSTRG.571405	gene15262	0.9667
MSTRG.571405	gene16048	-0.9667
MSTRG.571405	gene21097	0.95
MSTRG.571405	gene22535	0.9667
MSTRG.596749	gene18411	-0.9662
MSTRG.596749	gene23704	-0.9662
MSTRG.596749	gene4030	-0.9662
MSTRG.652474	gene10916	-0.95
MSTRG.652474	gene14299	0.9667
MSTRG.652474	gene1758	-0.9667
MSTRG.652474	gene23010	-0.9833
MSTRG.652474	gene2404	-0.95
MSTRG.652474	gene4130	-0.95
MSTRG.652474	gene5433	0.9667
MSTRG.652474	gene7815	-0.9667
MSTRG.652474	gene8317	0.9667
MSTRG.653547	gene10749	-0.9624
MSTRG.653547	gene10933	0.954
MSTRG.653547	gene13738	-0.9791
MSTRG.653547	gene14448	-0.9958
MSTRG.653547	gene17034	-0.954
MSTRG.653547	gene20534	0.954
MSTRG.653547	gene22005	-0.9791
MSTRG.653547	gene23924	0.9791
MSTRG.653547	gene24621	-0.954
MSTRG.653547	gene26542	0.9958
MSTRG.653547	gene28068	-0.954
MSTRG.653547	gene3058	0.9624
MSTRG.653547	gene3299	0.9624
MSTRG.653547	gene360	0.9624
MSTRG.653547	gene9985	-0.9707
MSTRG.653547	gene9989	-0.9624
MSTRG.689946	gene13315	0.9662
MSTRG.689946	gene26594	-0.9662
MSTRG.689946	gene3511	0.9832
MSTRG.694430	gene1657	-0.9574
MSTRG.7071	gene10310	-0.95
MSTRG.7071	gene10351	-0.95
MSTRG.7071	gene10590	0.95
MSTRG.7071	gene10601	-0.9667
MSTRG.7071	gene10603	-0.95
MSTRG.7071	gene11000	0.9667
MSTRG.7071	gene1231	0.9833
MSTRG.7071	gene12491	-0.95
MSTRG.7071	gene12525	0.95
MSTRG.7071	gene13306	0.9667
MSTRG.7071	gene13386	0.95
MSTRG.7071	gene13459	0.95
MSTRG.7071	gene1360	-0.9667
MSTRG.7071	gene13781	-0.9833
MSTRG.7071	gene1395	-0.9833
MSTRG.7071	gene14050	-0.9667
MSTRG.7071	gene15037	0.95
MSTRG.7071	gene15039	0.9667
MSTRG.7071	gene15040	0.95
MSTRG.7071	gene15069	0.9667
MSTRG.7071	gene152	-0.95
MSTRG.7071	gene15849	-0.9833
MSTRG.7071	gene16302	-0.95
MSTRG.7071	gene16482	-0.95
MSTRG.7071	gene16693	-0.95
MSTRG.7071	gene16946	0.95
MSTRG.7071	gene1714	0.9833
MSTRG.7071	gene17198	0.9667
MSTRG.7071	gene17655	0.9667
MSTRG.7071	gene17730	0.9667
MSTRG.7071	gene18009	0.95
MSTRG.7071	gene18600	0.95
MSTRG.7071	gene1877	0.9667
MSTRG.7071	gene1925	-0.9667
MSTRG.7071	gene19707	0.95
MSTRG.7071	gene19740	0.9667
MSTRG.7071	gene19769	0.95
MSTRG.7071	gene20213	0.95
MSTRG.7071	gene20592	-0.95
MSTRG.7071	gene20659	0.95
MSTRG.7071	gene21508	0.95
MSTRG.7071	gene22396	0.9667
MSTRG.7071	gene232	-0.9833
MSTRG.7071	gene23643	-0.9667
MSTRG.7071	gene2464	0.9667
MSTRG.7071	gene24666	0.9667
MSTRG.7071	gene24804	0.9667
MSTRG.7071	gene24858	-0.95
MSTRG.7071	gene25419	0.95
MSTRG.7071	gene25471	0.95
MSTRG.7071	gene25847	0.95
MSTRG.7071	gene25852	0.9667
MSTRG.7071	gene26784	-0.95
MSTRG.7071	gene27150	-0.9833
MSTRG.7071	gene2809	-0.9833
MSTRG.7071	gene2928	-0.9667
MSTRG.7071	gene3140	0.95
MSTRG.7071	gene3293	0.9667
MSTRG.7071	gene3528	-0.95
MSTRG.7071	gene354	-0.95
MSTRG.7071	gene3543	-0.95
MSTRG.7071	gene359	-0.95
MSTRG.7071	gene3823	0.9667
MSTRG.7071	gene3837	0.9667
MSTRG.7071	gene389	0.95
MSTRG.7071	gene4070	0.95
MSTRG.7071	gene4103	-0.95
MSTRG.7071	gene4319	0.9833
MSTRG.7071	gene4546	0.9833
MSTRG.7071	gene5571	-0.9833
MSTRG.7071	gene5863	-0.95
MSTRG.7071	gene6214	-0.95
MSTRG.7071	gene6291	0.9667
MSTRG.7071	gene6378	0.95
MSTRG.7071	gene6668	-0.9667
MSTRG.7071	gene7201	-0.95
MSTRG.7071	gene7210	0.95
MSTRG.7071	gene748	-0.9667
MSTRG.7071	gene7894	-0.95
MSTRG.7071	gene8084	0.9667
MSTRG.714796	gene10153	0.9667
MSTRG.714796	gene10313	0.9667
MSTRG.714796	gene10351	0.95
MSTRG.714796	gene10693	0.95
MSTRG.714796	gene11142	0.95
MSTRG.714796	gene11190	0.95
MSTRG.714796	gene11640	0.9667
MSTRG.714796	gene11709	0.9667
MSTRG.714796	gene11753	0.9667
MSTRG.714796	gene11877	0.9667
MSTRG.714796	gene11899	0.95
MSTRG.714796	gene12007	0.95
MSTRG.714796	gene12246	-0.95
MSTRG.714796	gene12459	0.9833
MSTRG.714796	gene12816	0.95
MSTRG.714796	gene12992	0.9667
MSTRG.714796	gene13935	0.95
MSTRG.714796	gene13963	-0.95
MSTRG.714796	gene13995	0.95
MSTRG.714796	gene14098	0.95
MSTRG.714796	gene1460	-0.9833
MSTRG.714796	gene14682	0.95
MSTRG.714796	gene15037	-0.95
MSTRG.714796	gene15156	0.9667
MSTRG.714796	gene15772	0.9833
MSTRG.714796	gene15918	0.9667
MSTRG.714796	gene16197	0.95
MSTRG.714796	gene16693	0.95
MSTRG.714796	gene17094	0.95
MSTRG.714796	gene17806	0.9667
MSTRG.714796	gene1783	0.9667
MSTRG.714796	gene17894	0.9667
MSTRG.714796	gene17964	0.95
MSTRG.714796	gene18581	-0.95
MSTRG.714796	gene1881	0.9667
MSTRG.714796	gene18930	0.95
MSTRG.714796	gene19244	0.95
MSTRG.714796	gene20184	-0.9833
MSTRG.714796	gene20279	0.9667
MSTRG.714796	gene20707	0.9667
MSTRG.714796	gene20897	0.9833
MSTRG.714796	gene21344	0.9667
MSTRG.714796	gene21795	1
MSTRG.714796	gene22250	0.9833
MSTRG.714796	gene23623	0.95
MSTRG.714796	gene23804	0.95
MSTRG.714796	gene25007	0.95
MSTRG.714796	gene25170	0.95
MSTRG.714796	gene25202	-0.95
MSTRG.714796	gene25292	0.9833
MSTRG.714796	gene25438	-1
MSTRG.714796	gene26986	-0.95
MSTRG.714796	gene27670	0.95
MSTRG.714796	gene28377	0.9667
MSTRG.714796	gene3082	-0.95
MSTRG.714796	gene3459	-0.9667
MSTRG.714796	gene3543	0.95
MSTRG.714796	gene3750	0.95
MSTRG.714796	gene3921	0.9833
MSTRG.714796	gene4103	0.95
MSTRG.714796	gene4154	0.9667
MSTRG.714796	gene4302	0.9833
MSTRG.714796	gene4562	0.9833
MSTRG.714796	gene4604	-0.9667
MSTRG.714796	gene559	0.9833
MSTRG.714796	gene5786	0.95
MSTRG.714796	gene5837	0.9833
MSTRG.714796	gene5853	0.9667
MSTRG.714796	gene5863	0.95
MSTRG.714796	gene6917	-0.95
MSTRG.714796	gene6965	0.9833
MSTRG.714796	gene7001	0.9833
MSTRG.714796	gene7311	0.9667
MSTRG.714796	gene7936	0.95
MSTRG.714796	gene7982	0.9667
MSTRG.714796	gene8388	0.9667
MSTRG.714796	gene848	0.9667
MSTRG.714796	gene8701	0.9667
MSTRG.714796	gene9785	0.95
MSTRG.714796	gene9880	0.95
MSTRG.722949	gene11865	-0.95
MSTRG.722949	gene11963	0.9833
MSTRG.722949	gene12011	-0.9667
MSTRG.722949	gene12269	0.95
MSTRG.722949	gene12294	-0.9667
MSTRG.722949	gene12412	-0.95
MSTRG.722949	gene13270	-0.95
MSTRG.722949	gene13389	-0.95
MSTRG.722949	gene13548	-0.95
MSTRG.722949	gene13721	-0.95
MSTRG.722949	gene14448	-0.9667
MSTRG.722949	gene14531	-0.95
MSTRG.722949	gene18009	-0.9667
MSTRG.722949	gene18011	-0.95
MSTRG.722949	gene18407	0.9667
MSTRG.722949	gene1873	-0.9667
MSTRG.722949	gene19009	-0.95
MSTRG.722949	gene19182	-0.9667
MSTRG.722949	gene1961	0.95
MSTRG.722949	gene2038	-0.95
MSTRG.722949	gene20659	-0.9667
MSTRG.722949	gene22205	-0.95
MSTRG.722949	gene23003	0.95
MSTRG.722949	gene23223	-0.95
MSTRG.722949	gene23671	-0.95
MSTRG.722949	gene23924	0.9833
MSTRG.722949	gene2431	-0.95
MSTRG.722949	gene24346	0.9833
MSTRG.722949	gene25160	-0.9667
MSTRG.722949	gene25419	-0.9667
MSTRG.722949	gene26542	0.95
MSTRG.722949	gene26581	-0.95
MSTRG.722949	gene26950	-0.95
MSTRG.722949	gene27276	0.95
MSTRG.722949	gene27674	0.95
MSTRG.722949	gene27828	-0.95
MSTRG.722949	gene2916	-0.95
MSTRG.722949	gene3058	0.95
MSTRG.722949	gene3299	1
MSTRG.722949	gene3434	-0.9667
MSTRG.722949	gene3472	0.95
MSTRG.722949	gene360	0.9833
MSTRG.722949	gene4010	-0.9667
MSTRG.722949	gene4085	0.95
MSTRG.722949	gene4279	-0.9667
MSTRG.722949	gene4284	-0.9833
MSTRG.722949	gene4325	-0.9667
MSTRG.722949	gene5618	0.95
MSTRG.722949	gene7110	-0.95
MSTRG.722949	gene77	0.95
MSTRG.722949	gene8252	-0.95
MSTRG.722949	gene8659	-0.95
MSTRG.722949	gene9804	-0.9667
MSTRG.722949	gene9982	-0.95
MSTRG.722949	gene9985	-0.95
MSTRG.722949	gene9989	-1
gene1786	gene11689	0.9667
gene1786	gene143	0.9667
gene1786	gene15924	0.9667
gene1786	gene25397	0.9667
gene1786	gene4291	0.9667
gene1786	gene5699	0.95
gene1786	gene9493	-0.95
gene18015	gene10189	0.9624
gene18015	gene11310	0.9624
gene18015	gene11916	-0.954
gene18015	gene12746	0.954
gene18015	gene13194	-0.9791
gene18015	gene13206	-0.9791
gene18015	gene13707	-0.9958
gene18015	gene14103	0.954
gene18015	gene16325	-0.9624
gene18015	gene1650	0.954
gene18015	gene17068	0.9624
gene18015	gene20156	0.954
gene18015	gene20199	-0.9791
gene18015	gene20944	0.9624
gene18015	gene21722	0.9624
gene18015	gene21792	0.954
gene18015	gene23632	0.9624
gene18015	gene24761	0.954
gene18015	gene2606	-0.9624
gene18015	gene26551	0.954
gene18015	gene2675	0.9707
gene18015	gene28188	0.954
gene18015	gene3191	0.954
gene18015	gene3385	0.9791
gene18015	gene379	0.954
gene18015	gene3795	0.954
gene18015	gene3820	0.954
gene18015	gene440	-0.9958
gene18015	gene5526	-0.954
gene18015	gene6951	0.9791
gene18015	gene7195	0.9624
gene18015	gene824	-0.954

## Sheet: Birth-E120d
Prediction results of cis target of differentially expressed lncRNA in Birth-E120d
Lnc_id	Gene_id	Distance
gene24735	gene24737	24004
MSTRG.439165	gene15977	4259
MSTRG.439165	gene15976	23976
MSTRG.439165	gene15978	1000
MSTRG.439165	gene15980	18713
MSTRG.620133	gene24545	44113
MSTRG.620133	gene24552	32401
MSTRG.620133	gene24549	4506
MSTRG.620133	gene24546	34579
MSTRG.620133	gene24547	4127
MSTRG.670758	gene26628	46037
MSTRG.125269	gene4159	30267
MSTRG.125269	gene4161	45614
MSTRG.249373	gene9268	26533
MSTRG.313133	gene11290	43694
MSTRG.313133	gene11287	311
MSTRG.313133	gene11289	24813
gene27281	gene27282	7770
gene27281	gene27283	38752
MSTRG.474537	gene17537	41956
MSTRG.474537	gene17536	9831
MSTRG.120302	gene4082	41327
MSTRG.291248	gene10582	107
MSTRG.2339	gene108	19903
MSTRG.2339	gene109	14304
MSTRG.474533	gene17536	1414
MSTRG.123486	gene4159	18426
MSTRG.76367	gene2775	29472
MSTRG.624411	gene24688	2632
MSTRG.624411	gene24689	18707
MSTRG.624411	gene24686	33332
MSTRG.623738	gene24657	42722
MSTRG.369460	gene13217	20381
gene1242	gene1243	7547
gene1242	gene1241	13951
gene1242	gene1244	23349
MSTRG.587303	gene22605	44991
MSTRG.587303	gene22607	577
MSTRG.587303	gene22608	16225
gene3211	gene3210	22014
MSTRG.53702	gene2127	16178
MSTRG.53702	gene2128	32960
MSTRG.631006	gene24923	17038
MSTRG.411827	gene14299	22875
MSTRG.572939	gene22032	1648
MSTRG.572939	gene22033	25957
MSTRG.572939	gene22030	40544
MSTRG.572939	gene22031	20813
MSTRG.572939	gene22034	35132
MSTRG.572939	gene22035	36321
MSTRG.145434	gene4928	20110
MSTRG.145434	gene4925	41886
MSTRG.617505	gene24362	26466
MSTRG.70758	gene2551	215
MSTRG.153038	gene5344	1134
MSTRG.421537	gene15066	33360
MSTRG.421537	gene15064	1816
MSTRG.421537	gene15049	45908
MSTRG.421537	gene15065	16105
MSTRG.421537	gene15050	39284
MSTRG.421537	gene15051	26332
MSTRG.421537	gene15052	699
MSTRG.598432	gene23197	16317
MSTRG.598432	gene23196	5286
MSTRG.598432	gene23195	3459
MSTRG.598432	gene23200	42966
MSTRG.598432	gene23198	23373
MSTRG.598432	gene23199	39391
MSTRG.203663	gene7406	505
MSTRG.203663	gene7405	34575
MSTRG.649071	gene25457	21706
MSTRG.617489	gene24362	11089
MSTRG.652473	gene25748	7635
gene1246	gene1248	49337
gene1246	gene1247	21539
gene1246	gene1245	21447
MSTRG.421324	gene15070	40299
MSTRG.421324	gene15071	22609
MSTRG.421324	gene15076	11279
MSTRG.421324	gene15077	28958
MSTRG.421324	gene15072	2509
MSTRG.421324	gene15078	41892
MSTRG.276918	gene10276	6975
MSTRG.268510	gene10115	22431
MSTRG.263752	gene10020	787
MSTRG.263752	gene10019	9158
MSTRG.263752	gene10018	47573
MSTRG.139847	gene4578	23180
MSTRG.447490	gene16361	46979
MSTRG.447490	gene16362	31646
MSTRG.7361	gene403	20059
MSTRG.7361	gene402	6354
MSTRG.722889	gene28344	17069
MSTRG.35463	gene1706	13287
MSTRG.313250	gene11297	30930
MSTRG.313250	gene11302	41093
MSTRG.681734	gene26987	26243
MSTRG.5824	gene302	48414
MSTRG.5824	gene303	44859
MSTRG.5824	gene304	25440
MSTRG.486437	gene18009	22234
MSTRG.486437	gene18011	15095
MSTRG.486437	gene18010	15668
MSTRG.537739	gene20659	1113
MSTRG.145440	gene4929	39485
MSTRG.145440	gene4928	6833
MSTRG.631238	gene24939	27348
MSTRG.631238	gene24941	4815
MSTRG.631238	gene24942	24971
MSTRG.520182	gene20287	512
MSTRG.322705	gene11853	22903
MSTRG.322705	gene11854	4624
MSTRG.491650	gene18644	33548
MSTRG.491650	gene18640	39318
MSTRG.491650	gene18643	6401
MSTRG.411762	gene14297	43112
MSTRG.411762	gene14298	4392
MSTRG.642103	gene25239	31438
MSTRG.496966	gene19007	310
MSTRG.496966	gene19008	17133
MSTRG.437735	gene15922	1019
MSTRG.437735	gene15923	9110
MSTRG.500854	gene19171	38226
MSTRG.649604	gene25469	13421
MSTRG.649604	gene25470	42794
MSTRG.649604	gene25471	20458
MSTRG.371421	gene13280	2794
MSTRG.371421	gene13279	299
MSTRG.53714	gene2127	23216
MSTRG.53714	gene2128	39998
gene12929	gene12928	1966
gene12929	gene12930	21552
MSTRG.29463	gene1249	11250
MSTRG.29463	gene1247	8211
MSTRG.598647	gene23228	45138
MSTRG.598647	gene23223	41072
MSTRG.598647	gene23226	12455
MSTRG.598647	gene23227	38901
MSTRG.598647	gene23224	26400
MSTRG.552486	gene21200	26904
MSTRG.552486	gene21203	19908
MSTRG.421196	gene15066	1121
MSTRG.421196	gene15064	33657
MSTRG.421196	gene15063	40680
MSTRG.421196	gene15068	31443
MSTRG.421196	gene15067	23814
MSTRG.421196	gene15065	19622
MSTRG.450058	gene16468	47459
MSTRG.450058	gene16466	42066
MSTRG.618380	gene24476	16424
MSTRG.421193	gene15066	301
MSTRG.421193	gene15064	29467
MSTRG.421193	gene15063	36490
MSTRG.421193	gene15068	35518
MSTRG.421193	gene15067	27889
MSTRG.421193	gene15065	15432
MSTRG.421193	gene15062	46355
MSTRG.264028	gene10032	16889
MSTRG.422199	gene15189	46373
MSTRG.422199	gene15188	21519
MSTRG.422199	gene15184	18356
MSTRG.422199	gene15185	6534
MSTRG.422199	gene15187	3919
MSTRG.422199	gene15182	30419
MSTRG.652474	gene25748	9043
MSTRG.171181	gene5944	3399
MSTRG.171181	gene5943	200
MSTRG.503565	gene19256	4139
MSTRG.44954	gene1874	11258
MSTRG.44954	gene1876	21746
MSTRG.44954	gene1873	37737
MSTRG.397674	gene13941	20218
Prediction results of trans target of differentially expressed lncRNA in Birth-E120d
LncRNA	Gene_id	Correlation
MSTRG.10739	gene21365	0.9624
MSTRG.10739	gene7914	-0.9791
MSTRG.120302	gene14206	-0.9574
MSTRG.120302	gene24120	0.9574
MSTRG.120302	gene4042	-0.9574
MSTRG.125269	gene12021	-0.95
MSTRG.125269	gene26487	-0.95
MSTRG.125269	gene28613	-0.9833
MSTRG.136182	gene10565	-0.954
MSTRG.136182	gene11974	-0.954
MSTRG.136182	gene14784	-0.9624
MSTRG.136182	gene16355	-0.9791
MSTRG.136182	gene16419	0.9791
MSTRG.136182	gene22172	-0.9624
MSTRG.136182	gene26536	-0.954
MSTRG.136252	gene110	-0.95
MSTRG.136252	gene11784	-0.95
MSTRG.136252	gene12187	-0.9667
MSTRG.136252	gene12194	-0.95
MSTRG.136252	gene12202	-0.95
MSTRG.136252	gene1232	0.9833
MSTRG.136252	gene13210	-0.9667
MSTRG.136252	gene13280	0.9833
MSTRG.136252	gene13340	-0.95
MSTRG.136252	gene13404	-0.95
MSTRG.136252	gene13445	0.9833
MSTRG.136252	gene13591	0.9833
MSTRG.136252	gene13906	-0.95
MSTRG.136252	gene13977	1
MSTRG.136252	gene14158	-0.9667
MSTRG.136252	gene14213	-1
MSTRG.136252	gene14472	-0.9833
MSTRG.136252	gene14952	-0.9833
MSTRG.136252	gene14985	-0.95
MSTRG.136252	gene1513	-0.9833
MSTRG.136252	gene154	-0.95
MSTRG.136252	gene15413	-0.9833
MSTRG.136252	gene15709	-0.9667
MSTRG.136252	gene15799	0.9667
MSTRG.136252	gene15955	-0.9667
MSTRG.136252	gene16337	-0.95
MSTRG.136252	gene16676	-0.9667
MSTRG.136252	gene17022	-0.9667
MSTRG.136252	gene17095	-0.9833
MSTRG.136252	gene17234	-0.95
MSTRG.136252	gene17288	-0.9833
MSTRG.136252	gene17936	-0.9833
MSTRG.136252	gene1822	0.95
MSTRG.136252	gene19137	-0.9833
MSTRG.136252	gene1959	0.95
MSTRG.136252	gene19761	-0.95
MSTRG.136252	gene20394	-0.95
MSTRG.136252	gene20925	-0.9833
MSTRG.136252	gene21339	-0.9833
MSTRG.136252	gene22224	-0.9833
MSTRG.136252	gene22238	-0.95
MSTRG.136252	gene22383	-0.95
MSTRG.136252	gene2295	-0.95
MSTRG.136252	gene23029	-0.95
MSTRG.136252	gene23107	-0.95
MSTRG.136252	gene23221	-0.95
MSTRG.136252	gene23590	0.95
MSTRG.136252	gene24215	-0.95
MSTRG.136252	gene24996	-0.95
MSTRG.136252	gene25290	-0.95
MSTRG.136252	gene25807	0.95
MSTRG.136252	gene25856	-0.95
MSTRG.136252	gene26075	-0.9833
MSTRG.136252	gene2704	-1
MSTRG.136252	gene27513	-0.95
MSTRG.136252	gene2892	-0.9667
MSTRG.136252	gene3115	-0.95
MSTRG.136252	gene4119	-0.9667
MSTRG.136252	gene4555	-0.95
MSTRG.136252	gene457	-0.95
MSTRG.136252	gene4774	-0.9667
MSTRG.136252	gene4781	-0.95
MSTRG.136252	gene4793	-0.9667
MSTRG.136252	gene4858	-0.9833
MSTRG.136252	gene521	0.95
MSTRG.136252	gene5316	-0.95
MSTRG.136252	gene5418	-0.95
MSTRG.136252	gene562	-0.95
MSTRG.136252	gene595	-0.95
MSTRG.136252	gene634	-0.9667
MSTRG.136252	gene6757	-0.95
MSTRG.136252	gene6967	-0.95
MSTRG.136252	gene7085	0.9667
MSTRG.136252	gene7387	-0.95
MSTRG.136252	gene7724	-0.95
MSTRG.136252	gene775	0.95
MSTRG.136252	gene7765	-0.95
MSTRG.136252	gene783	-1
MSTRG.136252	gene7874	-0.95
MSTRG.136252	gene7932	0.95
MSTRG.136252	gene807	-0.95
MSTRG.136252	gene8105	-0.95
MSTRG.136252	gene8386	-0.95
MSTRG.136252	gene8415	-0.9667
MSTRG.136252	gene8681	-0.9667
MSTRG.136252	gene8825	-0.95
MSTRG.136252	gene9369	-0.9667
MSTRG.139847	gene10633	0.9662
MSTRG.139872	gene10066	0.95
MSTRG.139872	gene10217	0.9833
MSTRG.139872	gene10513	0.9667
MSTRG.139872	gene10517	-0.9667
MSTRG.139872	gene10664	0.9667
MSTRG.139872	gene10823	0.95
MSTRG.139872	gene11662	-0.9833
MSTRG.139872	gene11716	0.95
MSTRG.139872	gene1203	0.9667
MSTRG.139872	gene12056	0.9667
MSTRG.139872	gene12406	-0.95
MSTRG.139872	gene13319	0.95
MSTRG.139872	gene13604	0.9667
MSTRG.139872	gene14298	0.9667
MSTRG.139872	gene14356	0.9667
MSTRG.139872	gene15030	-0.95
MSTRG.139872	gene15041	0.9667
MSTRG.139872	gene15049	0.9667
MSTRG.139872	gene15050	0.9833
MSTRG.139872	gene15051	0.9667
MSTRG.139872	gene15056	0.9667
MSTRG.139872	gene15071	0.9833
MSTRG.139872	gene15081	0.9667
MSTRG.139872	gene15905	0.95
MSTRG.139872	gene16658	0.9667
MSTRG.139872	gene16887	0.95
MSTRG.139872	gene16946	0.9833
MSTRG.139872	gene1707	0.9667
MSTRG.139872	gene1714	0.95
MSTRG.139872	gene18581	0.95
MSTRG.139872	gene19015	-0.9667
MSTRG.139872	gene19261	0.95
MSTRG.139872	gene19708	0.9667
MSTRG.139872	gene20213	0.9833
MSTRG.139872	gene20256	0.9833
MSTRG.139872	gene20585	0.95
MSTRG.139872	gene20904	-0.95
MSTRG.139872	gene21497	-0.95
MSTRG.139872	gene21508	0.9833
MSTRG.139872	gene21579	-0.9833
MSTRG.139872	gene23705	0.9833
MSTRG.139872	gene23763	0.9667
MSTRG.139872	gene23831	0.95
MSTRG.139872	gene24330	0.95
MSTRG.139872	gene24430	0.9667
MSTRG.139872	gene24525	-0.95
MSTRG.139872	gene2457	-0.9667
MSTRG.139872	gene24630	0.95
MSTRG.139872	gene24698	0.95
MSTRG.139872	gene26284	0.95
MSTRG.139872	gene26772	0.9667
MSTRG.139872	gene26876	-0.95
MSTRG.139872	gene27242	0.95
MSTRG.139872	gene27783	-0.9833
MSTRG.139872	gene3045	0.95
MSTRG.139872	gene3071	0.95
MSTRG.139872	gene3073	-0.9667
MSTRG.139872	gene3092	-0.95
MSTRG.139872	gene4004	-0.95
MSTRG.139872	gene4319	0.95
MSTRG.139872	gene4816	0.95
MSTRG.139872	gene572	0.9667
MSTRG.139872	gene5748	-0.9667
MSTRG.139872	gene607	0.95
MSTRG.139872	gene6214	-0.9833
MSTRG.139872	gene6242	0.95
MSTRG.139872	gene6377	0.9667
MSTRG.139872	gene6379	0.9667
MSTRG.139872	gene6380	0.95
MSTRG.139872	gene6521	0.9667
MSTRG.139872	gene6959	0.9667
MSTRG.139872	gene7210	0.9833
MSTRG.139872	gene7255	0.9667
MSTRG.139872	gene982	-0.9667
MSTRG.151812	gene10216	0.95
MSTRG.151812	gene11010	0.9667
MSTRG.151812	gene13438	-0.9667
MSTRG.151812	gene13790	-0.95
MSTRG.151812	gene23017	0.9667
MSTRG.151812	gene24525	-0.95
MSTRG.151812	gene25294	1
MSTRG.151812	gene5673	0.9667
MSTRG.151812	gene803	0.95
MSTRG.153038	gene19711	0.95
MSTRG.153038	gene2035	0.9667
MSTRG.171181	gene15739	0.9667
MSTRG.171181	gene16549	-0.95
MSTRG.171181	gene16619	-0.95
MSTRG.171181	gene17162	-0.9667
MSTRG.171181	gene24861	0.9833
MSTRG.171181	gene26165	0.95
MSTRG.171181	gene26540	-0.9667
MSTRG.171181	gene27069	-0.9667
MSTRG.171181	gene2979	-0.9667
MSTRG.171181	gene3911	-0.9667
MSTRG.171181	gene4016	-0.9667
MSTRG.171181	gene5426	0.9667
MSTRG.171181	gene6155	0.9667
MSTRG.172759	gene10153	0.9833
MSTRG.172759	gene10185	-0.9667
MSTRG.172759	gene10351	0.95
MSTRG.172759	gene10385	0.95
MSTRG.172759	gene10693	0.9667
MSTRG.172759	gene10725	0.95
MSTRG.172759	gene10871	0.95
MSTRG.172759	gene11142	0.9667
MSTRG.172759	gene11190	0.9667
MSTRG.172759	gene11877	0.95
MSTRG.172759	gene11899	0.9667
MSTRG.172759	gene12320	-0.9667
MSTRG.172759	gene12454	0.95
MSTRG.172759	gene12459	0.9667
MSTRG.172759	gene12764	0.9667
MSTRG.172759	gene12816	0.9667
MSTRG.172759	gene12875	0.95
MSTRG.172759	gene12974	0.9667
MSTRG.172759	gene12992	0.9833
MSTRG.172759	gene13230	-0.95
MSTRG.172759	gene13935	0.9667
MSTRG.172759	gene13953	0.95
MSTRG.172759	gene14098	0.95
MSTRG.172759	gene14247	0.9667
MSTRG.172759	gene1460	-0.9667
MSTRG.172759	gene15037	-0.95
MSTRG.172759	gene15156	0.95
MSTRG.172759	gene15918	0.9833
MSTRG.172759	gene1601	0.95
MSTRG.172759	gene1612	0.9667
MSTRG.172759	gene16197	0.9667
MSTRG.172759	gene16201	-0.9667
MSTRG.172759	gene16693	0.95
MSTRG.172759	gene16697	0.95
MSTRG.172759	gene16747	0.95
MSTRG.172759	gene17047	0.95
MSTRG.172759	gene17094	0.9667
MSTRG.172759	gene17175	-0.95
MSTRG.172759	gene17806	0.9833
MSTRG.172759	gene17884	0.95
MSTRG.172759	gene17964	1
MSTRG.172759	gene1881	0.9833
MSTRG.172759	gene18868	0.95
MSTRG.172759	gene18930	0.95
MSTRG.172759	gene19061	0.95
MSTRG.172759	gene19283	-0.95
MSTRG.172759	gene19726	0.9833
MSTRG.172759	gene19734	0.9667
MSTRG.172759	gene20184	-0.9667
MSTRG.172759	gene20670	0.95
MSTRG.172759	gene20702	0.9667
MSTRG.172759	gene20707	0.95
MSTRG.172759	gene20897	0.9667
MSTRG.172759	gene2124	-0.9667
MSTRG.172759	gene21507	0.95
MSTRG.172759	gene21795	0.95
MSTRG.172759	gene2196	-0.9667
MSTRG.172759	gene22757	0.95
MSTRG.172759	gene2296	0.9667
MSTRG.172759	gene23804	0.9667
MSTRG.172759	gene2393	0.9667
MSTRG.172759	gene24840	-0.95
MSTRG.172759	gene25007	0.9667
MSTRG.172759	gene2502	0.9833
MSTRG.172759	gene25125	0.95
MSTRG.172759	gene25202	-0.9667
MSTRG.172759	gene2521	-0.9667
MSTRG.172759	gene25269	0.9667
MSTRG.172759	gene25284	0.9667
MSTRG.172759	gene25289	0.95
MSTRG.172759	gene25292	0.9667
MSTRG.172759	gene25306	0.9667
MSTRG.172759	gene25321	-0.95
MSTRG.172759	gene25438	-0.95
MSTRG.172759	gene25569	0.95
MSTRG.172759	gene26058	0.95
MSTRG.172759	gene26373	0.95
MSTRG.172759	gene26880	0.9667
MSTRG.172759	gene26986	-0.9667
MSTRG.172759	gene27227	0.9833
MSTRG.172759	gene28157	0.9667
MSTRG.172759	gene28264	0.9833
MSTRG.172759	gene28377	0.95
MSTRG.172759	gene2944	0.9833
MSTRG.172759	gene3082	-0.9667
MSTRG.172759	gene3459	-0.95
MSTRG.172759	gene3543	0.95
MSTRG.172759	gene3833	-0.95
MSTRG.172759	gene3842	0.9833
MSTRG.172759	gene4103	0.95
MSTRG.172759	gene4302	0.9667
MSTRG.172759	gene445	0.95
MSTRG.172759	gene4562	0.9667
MSTRG.172759	gene475	0.95
MSTRG.172759	gene5786	0.9667
MSTRG.172759	gene5837	0.9667
MSTRG.172759	gene5853	0.9833
MSTRG.172759	gene5863	0.95
MSTRG.172759	gene6050	-0.9667
MSTRG.172759	gene6187	0.95
MSTRG.172759	gene6216	0.9667
MSTRG.172759	gene6946	-0.9833
MSTRG.172759	gene6965	0.9667
MSTRG.172759	gene701	0.9833
MSTRG.172759	gene7547	0.9667
MSTRG.172759	gene756	0.95
MSTRG.172759	gene7895	0.95
MSTRG.172759	gene7936	1
MSTRG.172759	gene7982	0.9833
MSTRG.172759	gene8198	-0.95
MSTRG.172759	gene8303	0.95
MSTRG.172759	gene8395	0.95
MSTRG.172759	gene9402	-0.9833
MSTRG.172759	gene9403	0.9667
MSTRG.172759	gene9785	0.9667
MSTRG.183846	gene10430	-0.9667
MSTRG.183846	gene10666	-0.9667
MSTRG.183846	gene10758	-0.9833
MSTRG.183846	gene10835	0.9833
MSTRG.183846	gene10867	-0.95
MSTRG.183846	gene10897	0.95
MSTRG.183846	gene11146	1
MSTRG.183846	gene11244	0.9833
MSTRG.183846	gene11963	0.9667
MSTRG.183846	gene12011	-0.95
MSTRG.183846	gene12269	0.9667
MSTRG.183846	gene12297	-0.9833
MSTRG.183846	gene12337	-0.9667
MSTRG.183846	gene12875	0.95
MSTRG.183846	gene13187	-0.9667
MSTRG.183846	gene13683	0.9667
MSTRG.183846	gene13731	0.9667
MSTRG.183846	gene13979	-0.95
MSTRG.183846	gene14051	-0.95
MSTRG.183846	gene14088	-0.9667
MSTRG.183846	gene15052	-0.95
MSTRG.183846	gene15728	-0.95
MSTRG.183846	gene16854	-0.95
MSTRG.183846	gene1759	-0.9833
MSTRG.183846	gene18083	0.95
MSTRG.183846	gene1873	-0.95
MSTRG.183846	gene19009	-0.9833
MSTRG.183846	gene19061	0.95
MSTRG.183846	gene19182	-0.9833
MSTRG.183846	gene19283	-0.95
MSTRG.183846	gene20318	0.95
MSTRG.183846	gene2038	-0.95
MSTRG.183846	gene20413	-0.9833
MSTRG.183846	gene20481	0.95
MSTRG.183846	gene21690	-0.9667
MSTRG.183846	gene2202	0.9667
MSTRG.183846	gene23003	0.95
MSTRG.183846	gene25160	-0.95
MSTRG.183846	gene2518	0.9667
MSTRG.183846	gene25321	-0.95
MSTRG.183846	gene26520	0.95
MSTRG.183846	gene27526	0.95
MSTRG.183846	gene28239	-0.9667
MSTRG.183846	gene2916	-0.9667
MSTRG.183846	gene3140	-0.9667
MSTRG.183846	gene3330	0.95
MSTRG.183846	gene3833	-0.95
MSTRG.183846	gene4182	0.95
MSTRG.183846	gene4284	-0.9667
MSTRG.183846	gene4301	-0.95
MSTRG.183846	gene4331	-0.9833
MSTRG.183846	gene5182	0.9667
MSTRG.183846	gene5357	0.95
MSTRG.183846	gene5951	-0.9833
MSTRG.183846	gene600	1
MSTRG.183846	gene6188	0.9833
MSTRG.183846	gene6753	0.95
MSTRG.183846	gene7081	-0.95
MSTRG.183846	gene7092	-0.95
MSTRG.183846	gene7888	0.9667
MSTRG.183846	gene7895	0.95
MSTRG.183846	gene8252	-0.9667
MSTRG.183846	gene8586	-0.95
MSTRG.203663	gene1674	-0.9667
MSTRG.203663	gene3088	0.95
MSTRG.225490	gene10153	-0.9832
MSTRG.225490	gene10175	-0.9832
MSTRG.225490	gene10313	-0.9662
MSTRG.225490	gene10351	-0.9662
MSTRG.225490	gene10725	-0.9662
MSTRG.225490	gene11190	-0.9662
MSTRG.225490	gene11877	-0.9662
MSTRG.225490	gene12006	-0.9662
MSTRG.225490	gene12320	0.9662
MSTRG.225490	gene12459	-0.9832
MSTRG.225490	gene12816	-0.9662
MSTRG.225490	gene12974	-0.9662
MSTRG.225490	gene12992	-0.9832
MSTRG.225490	gene13552	-0.9662
MSTRG.225490	gene14098	-0.9662
MSTRG.225490	gene1460	0.9832
MSTRG.225490	gene15037	0.9662
MSTRG.225490	gene15156	-0.9662
MSTRG.225490	gene15367	0.9662
MSTRG.225490	gene15918	-0.9832
MSTRG.225490	gene1612	-0.9662
MSTRG.225490	gene16197	-0.9662
MSTRG.225490	gene16302	-0.9662
MSTRG.225490	gene16693	-0.9662
MSTRG.225490	gene17806	-0.9832
MSTRG.225490	gene17964	-0.9662
MSTRG.225490	gene1881	-0.9832
MSTRG.225490	gene18815	-0.9662
MSTRG.225490	gene20184	0.9832
MSTRG.225490	gene20310	-0.9662
MSTRG.225490	gene20702	-0.9662
MSTRG.225490	gene20897	-0.9832
MSTRG.225490	gene2124	0.9662
MSTRG.225490	gene22757	-0.9662
MSTRG.225490	gene24235	0.9832
MSTRG.225490	gene25007	-0.9662
MSTRG.225490	gene25201	0.9832
MSTRG.225490	gene25202	0.9662
MSTRG.225490	gene25256	-0.9662
MSTRG.225490	gene25284	-0.9662
MSTRG.225490	gene25292	-0.9832
MSTRG.225490	gene25306	-0.9662
MSTRG.225490	gene26986	0.9662
MSTRG.225490	gene2774	-0.9662
MSTRG.225490	gene28377	-0.9662
MSTRG.225490	gene3195	-0.9662
MSTRG.225490	gene3459	0.9662
MSTRG.225490	gene3543	-0.9662
MSTRG.225490	gene4103	-0.9662
MSTRG.225490	gene4419	-0.9662
MSTRG.225490	gene4604	0.9662
MSTRG.225490	gene5837	-0.9832
MSTRG.225490	gene5853	-0.9662
MSTRG.225490	gene5863	-0.9662
MSTRG.225490	gene6050	0.9662
MSTRG.225490	gene6216	-0.9662
MSTRG.225490	gene6965	-0.9832
MSTRG.225490	gene7201	-0.9662
MSTRG.225490	gene756	-0.9662
MSTRG.225490	gene7936	-0.9662
MSTRG.225490	gene7982	-0.9832
MSTRG.225490	gene8303	-0.9662
MSTRG.225490	gene8388	-0.9662
MSTRG.225490	gene918	0.9662
MSTRG.225490	gene9403	-0.9662
MSTRG.225491	gene10069	-0.95
MSTRG.225491	gene10153	-0.95
MSTRG.225491	gene10313	-0.9833
MSTRG.225491	gene10666	0.95
MSTRG.225491	gene10823	0.95
MSTRG.225491	gene11142	-0.95
MSTRG.225491	gene11190	-0.9667
MSTRG.225491	gene11877	-0.9833
MSTRG.225491	gene11899	-0.95
MSTRG.225491	gene11918	-0.95
MSTRG.225491	gene11953	-0.95
MSTRG.225491	gene11963	-0.95
MSTRG.225491	gene12006	-0.9667
MSTRG.225491	gene12246	1
MSTRG.225491	gene1226	0.95
MSTRG.225491	gene12412	0.9667
MSTRG.225491	gene12459	-0.9667
MSTRG.225491	gene12816	-0.9667
MSTRG.225491	gene12992	-0.95
MSTRG.225491	gene13270	0.9667
MSTRG.225491	gene13582	0.95
MSTRG.225491	gene13963	1
MSTRG.225491	gene14098	-0.9667
MSTRG.225491	gene14531	0.9667
MSTRG.225491	gene1460	0.9667
MSTRG.225491	gene15052	0.9667
MSTRG.225491	gene15156	-0.9833
MSTRG.225491	gene15367	0.9667
MSTRG.225491	gene15918	-0.95
MSTRG.225491	gene16197	-0.9667
MSTRG.225491	gene17806	-0.95
MSTRG.225491	gene18111	-0.95
MSTRG.225491	gene18581	0.95
MSTRG.225491	gene1881	-0.95
MSTRG.225491	gene18871	-0.95
MSTRG.225491	gene19680	0.9833
MSTRG.225491	gene20184	0.9667
MSTRG.225491	gene20318	-0.9667
MSTRG.225491	gene2038	0.9667
MSTRG.225491	gene20422	0.9833
MSTRG.225491	gene20897	-0.9667
MSTRG.225491	gene21059	0.95
MSTRG.225491	gene21580	-0.95
MSTRG.225491	gene21690	0.95
MSTRG.225491	gene217	-0.95
MSTRG.225491	gene21724	0.9833
MSTRG.225491	gene21795	-0.95
MSTRG.225491	gene21851	-0.95
MSTRG.225491	gene22250	-0.9667
MSTRG.225491	gene22292	-0.95
MSTRG.225491	gene22751	-0.95
MSTRG.225491	gene23025	0.9833
MSTRG.225491	gene23671	0.9667
MSTRG.225491	gene23804	-0.95
MSTRG.225491	gene25007	-0.9667
MSTRG.225491	gene25128	-0.95
MSTRG.225491	gene25202	0.9667
MSTRG.225491	gene25292	-0.9667
MSTRG.225491	gene25401	0.9833
MSTRG.225491	gene25438	0.95
MSTRG.225491	gene26986	0.9667
MSTRG.225491	gene27099	0.95
MSTRG.225491	gene28377	-0.9833
MSTRG.225491	gene3082	0.95
MSTRG.225491	gene3195	-0.9667
MSTRG.225491	gene3330	-0.9667
MSTRG.225491	gene3434	0.9833
MSTRG.225491	gene3446	0.95
MSTRG.225491	gene3459	0.9833
MSTRG.225491	gene3843	-0.95
MSTRG.225491	gene4037	0.9667
MSTRG.225491	gene4164	-0.95
MSTRG.225491	gene4279	0.9833
MSTRG.225491	gene4284	0.95
MSTRG.225491	gene4568	-0.95
MSTRG.225491	gene4604	0.9833
MSTRG.225491	gene4816	0.95
MSTRG.225491	gene5357	-0.9667
MSTRG.225491	gene559	-0.9667
MSTRG.225491	gene5772	-0.9667
MSTRG.225491	gene5802	0.95
MSTRG.225491	gene5837	-0.9667
MSTRG.225491	gene632	-0.95
MSTRG.225491	gene6580	0.95
MSTRG.225491	gene6917	0.95
MSTRG.225491	gene6965	-0.9667
MSTRG.225491	gene7982	-0.95
MSTRG.225491	gene8031	0.95
MSTRG.225491	gene848	-0.95
MSTRG.225491	gene8701	-0.9833
MSTRG.225491	gene9880	-1
MSTRG.2339	gene10816	-0.9833
MSTRG.2339	gene21022	-0.9833
MSTRG.239279	gene11958	-0.9574
MSTRG.239279	gene16665	0.9574
MSTRG.249373	gene10227	0.95
MSTRG.249373	gene10582	0.95
MSTRG.249373	gene12359	-0.95
MSTRG.249373	gene13406	0.95
MSTRG.249373	gene13537	-0.9833
MSTRG.249373	gene15009	0.95
MSTRG.249373	gene15312	0.95
MSTRG.249373	gene16601	0.9667
MSTRG.249373	gene1715	0.9667
MSTRG.249373	gene18947	0.9667
MSTRG.249373	gene19057	0.95
MSTRG.249373	gene1946	0.95
MSTRG.249373	gene1975	0.95
MSTRG.249373	gene22009	0.95
MSTRG.249373	gene2361	-0.95
MSTRG.249373	gene24616	0.95
MSTRG.249373	gene24816	-0.9667
MSTRG.249373	gene24868	0.95
MSTRG.249373	gene26550	0.95
MSTRG.249373	gene26867	-0.95
MSTRG.249373	gene26886	-0.9833
MSTRG.249373	gene28200	-0.95
MSTRG.249373	gene28239	0.95
MSTRG.249373	gene412	0.95
MSTRG.249373	gene6226	0.95
MSTRG.249373	gene7136	-0.9833
MSTRG.249373	gene7840	0.9667
MSTRG.249373	gene7856	0.9667
MSTRG.249373	gene8410	0.9667
MSTRG.249373	gene9387	0.95
MSTRG.263752	gene10066	0.9833
MSTRG.263752	gene1052	0.9667
MSTRG.263752	gene10719	0.95
MSTRG.263752	gene10929	0.95
MSTRG.263752	gene11000	0.9833
MSTRG.263752	gene11160	0.9833
MSTRG.263752	gene11198	0.95
MSTRG.263752	gene11913	-0.9833
MSTRG.263752	gene12056	0.95
MSTRG.263752	gene12163	-0.9667
MSTRG.263752	gene12367	0.95
MSTRG.263752	gene12406	-0.9833
MSTRG.263752	gene12520	0.95
MSTRG.263752	gene12525	0.9667
MSTRG.263752	gene12722	0.9833
MSTRG.263752	gene13166	0.95
MSTRG.263752	gene13306	0.95
MSTRG.263752	gene13459	0.9667
MSTRG.263752	gene1360	-0.9833
MSTRG.263752	gene13604	0.95
MSTRG.263752	gene13781	-0.9667
MSTRG.263752	gene1395	-0.9667
MSTRG.263752	gene14065	0.95
MSTRG.263752	gene14356	0.95
MSTRG.263752	gene15691	0.9667
MSTRG.263752	gene16362	0.9667
MSTRG.263752	gene16655	0.95
MSTRG.263752	gene16658	0.9667
MSTRG.263752	gene16887	0.95
MSTRG.263752	gene16946	0.95
MSTRG.263752	gene1714	0.9667
MSTRG.263752	gene17730	0.95
MSTRG.263752	gene18600	1
MSTRG.263752	gene1877	0.9833
MSTRG.263752	gene19057	0.95
MSTRG.263752	gene1946	0.9667
MSTRG.263752	gene19708	0.95
MSTRG.263752	gene19740	0.9833
MSTRG.263752	gene1975	0.95
MSTRG.263752	gene19769	0.9667
MSTRG.263752	gene20213	0.95
MSTRG.263752	gene20808	-0.95
MSTRG.263752	gene2122	0.9833
MSTRG.263752	gene21508	0.95
MSTRG.263752	gene22009	0.95
MSTRG.263752	gene23580	0.95
MSTRG.263752	gene2445	0.95
MSTRG.263752	gene24616	0.95
MSTRG.263752	gene24804	0.95
MSTRG.263752	gene24858	-0.9667
MSTRG.263752	gene24870	0.9667
MSTRG.263752	gene25204	0.9667
MSTRG.263752	gene25266	-0.9833
MSTRG.263752	gene25471	0.95
MSTRG.263752	gene25847	0.95
MSTRG.263752	gene26284	0.9833
MSTRG.263752	gene27242	0.9833
MSTRG.263752	gene2809	-0.9667
MSTRG.263752	gene28209	0.9667
MSTRG.263752	gene3071	0.95
MSTRG.263752	gene354	-1
MSTRG.263752	gene3823	0.9833
MSTRG.263752	gene3837	0.9833
MSTRG.263752	gene4070	1
MSTRG.263752	gene412	0.95
MSTRG.263752	gene4319	0.9667
MSTRG.263752	gene4448	0.95
MSTRG.263752	gene447	0.95
MSTRG.263752	gene4546	0.9667
MSTRG.263752	gene5302	0.95
MSTRG.263752	gene5323	0.9667
MSTRG.263752	gene572	0.9667
MSTRG.263752	gene6214	-0.95
MSTRG.263752	gene6371	0.9667
MSTRG.263752	gene6378	0.9667
MSTRG.263752	gene6521	0.9667
MSTRG.263752	gene6886	-0.95
MSTRG.263752	gene705	0.9667
MSTRG.263752	gene7210	0.95
MSTRG.263752	gene7894	-0.95
MSTRG.263752	gene7968	-0.95
MSTRG.263752	gene8084	0.9833
MSTRG.263752	gene851	0.95
MSTRG.276918	gene13210	0.95
MSTRG.276918	gene17236	0.9667
MSTRG.276918	gene20925	0.95
MSTRG.276918	gene22224	0.95
MSTRG.276918	gene22608	-0.9667
MSTRG.276918	gene4589	0.9667
MSTRG.276918	gene8106	0.95
MSTRG.291248	gene12782	-0.9667
MSTRG.29463	gene10175	-0.9624
MSTRG.29463	gene11190	-0.954
MSTRG.29463	gene1248	0.9958
MSTRG.29463	gene12710	0.9791
MSTRG.29463	gene12816	-0.954
MSTRG.29463	gene13552	-0.9791
MSTRG.29463	gene14098	-0.954
MSTRG.29463	gene16197	-0.954
MSTRG.29463	gene19225	-0.9791
MSTRG.29463	gene19780	-0.9791
MSTRG.29463	gene20310	-0.954
MSTRG.29463	gene20422	0.9707
MSTRG.29463	gene21851	-0.9958
MSTRG.29463	gene22751	-0.9958
MSTRG.29463	gene23025	0.9707
MSTRG.29463	gene23671	0.954
MSTRG.29463	gene24976	-0.9791
MSTRG.29463	gene25007	-0.954
MSTRG.29463	gene25128	-0.9958
MSTRG.29463	gene25190	0.9624
MSTRG.29463	gene25202	0.954
MSTRG.29463	gene25256	-0.9791
MSTRG.29463	gene26986	0.954
MSTRG.29463	gene2774	-0.9791
MSTRG.29463	gene3940	-0.954
MSTRG.29463	gene4164	-0.9958
MSTRG.29463	gene441	-0.9624
MSTRG.29463	gene5772	-0.954
MSTRG.29463	gene6194	0.9624
MSTRG.29463	gene632	-0.9707
MSTRG.29463	gene8142	-0.9791
MSTRG.29463	gene9413	0.954
MSTRG.297679	gene9370	0.9662
MSTRG.313133	gene10069	0.9667
MSTRG.313133	gene10090	0.95
MSTRG.313133	gene10153	0.9667
MSTRG.313133	gene10351	0.9667
MSTRG.313133	gene1038	0.95
MSTRG.313133	gene10666	-0.9833
MSTRG.313133	gene10758	-0.9667
MSTRG.313133	gene10835	0.9667
MSTRG.313133	gene10867	-0.95
MSTRG.313133	gene10871	0.9667
MSTRG.313133	gene10889	0.95
MSTRG.313133	gene11006	-0.95
MSTRG.313133	gene11142	0.95
MSTRG.313133	gene11146	0.95
MSTRG.313133	gene11190	0.9833
MSTRG.313133	gene11877	0.9667
MSTRG.313133	gene11899	0.95
MSTRG.313133	gene11918	0.9667
MSTRG.313133	gene12011	-0.95
MSTRG.313133	gene12320	-0.9833
MSTRG.313133	gene12459	0.95
MSTRG.313133	gene12816	0.9833
MSTRG.313133	gene12875	1
MSTRG.313133	gene12887	0.95
MSTRG.313133	gene12974	0.9833
MSTRG.313133	gene12992	0.9667
MSTRG.313133	gene13683	0.95
MSTRG.313133	gene13731	0.95
MSTRG.313133	gene13857	-0.95
MSTRG.313133	gene13883	0.9667
MSTRG.313133	gene13953	0.9667
MSTRG.313133	gene13979	-0.9667
MSTRG.313133	gene14051	-0.9667
MSTRG.313133	gene14176	0.95
MSTRG.313133	gene1460	-0.95
MSTRG.313133	gene15037	-0.9667
MSTRG.313133	gene15052	-0.95
MSTRG.313133	gene15156	0.9667
MSTRG.313133	gene15728	-0.9667
MSTRG.313133	gene15918	0.9667
MSTRG.313133	gene1612	0.9833
MSTRG.313133	gene16197	0.9833
MSTRG.313133	gene16201	-0.9833
MSTRG.313133	gene16693	0.9667
MSTRG.313133	gene16697	0.95
MSTRG.313133	gene16747	0.9667
MSTRG.313133	gene16862	-0.95
MSTRG.313133	gene17046	0.9833
MSTRG.313133	gene1759	-0.9667
MSTRG.313133	gene17707	0.95
MSTRG.313133	gene17806	0.9667
MSTRG.313133	gene17964	0.95
MSTRG.313133	gene18083	0.9667
MSTRG.313133	gene1873	-0.95
MSTRG.313133	gene1881	0.9667
MSTRG.313133	gene19009	-0.9667
MSTRG.313133	gene19061	1
MSTRG.313133	gene19283	-1
MSTRG.313133	gene19726	0.9667
MSTRG.313133	gene20184	-0.95
MSTRG.313133	gene20318	0.95
MSTRG.313133	gene20413	-0.9667
MSTRG.313133	gene20422	-0.95
MSTRG.313133	gene20702	0.9833
MSTRG.313133	gene20738	-0.95
MSTRG.313133	gene20818	0.95
MSTRG.313133	gene20897	0.95
MSTRG.313133	gene2124	-0.9833
MSTRG.313133	gene21690	-0.9833
MSTRG.313133	gene2202	0.9833
MSTRG.313133	gene22292	0.9667
MSTRG.313133	gene2296	0.95
MSTRG.313133	gene23025	-0.95
MSTRG.313133	gene23804	0.95
MSTRG.313133	gene24076	-0.95
MSTRG.313133	gene24078	0.95
MSTRG.313133	gene24657	-0.95
MSTRG.313133	gene25007	0.9833
MSTRG.313133	gene2502	0.9667
MSTRG.313133	gene25160	-0.95
MSTRG.313133	gene2518	0.95
MSTRG.313133	gene25202	-0.9833
MSTRG.313133	gene2521	-0.9833
MSTRG.313133	gene25269	0.9833
MSTRG.313133	gene25284	0.9833
MSTRG.313133	gene25292	0.95
MSTRG.313133	gene25306	0.9833
MSTRG.313133	gene25321	-1
MSTRG.313133	gene25569	0.9667
MSTRG.313133	gene26520	0.9667
MSTRG.313133	gene26880	0.9833
MSTRG.313133	gene26986	-0.9833
MSTRG.313133	gene27096	-0.95
MSTRG.313133	gene27489	0.95
MSTRG.313133	gene27526	0.9667
MSTRG.313133	gene27959	-0.9667
MSTRG.313133	gene28264	0.9667
MSTRG.313133	gene28311	0.95
MSTRG.313133	gene28377	0.9667
MSTRG.313133	gene2936	0.95
MSTRG.313133	gene3082	-0.95
MSTRG.313133	gene3330	0.95
MSTRG.313133	gene3459	-0.9667
MSTRG.313133	gene3543	0.9667
MSTRG.313133	gene3569	0.95
MSTRG.313133	gene3833	-1
MSTRG.313133	gene3842	0.9667
MSTRG.313133	gene4103	0.9667
MSTRG.313133	gene4219	0.9667
MSTRG.313133	gene4560	-0.95
MSTRG.313133	gene4568	0.9667
MSTRG.313133	gene5182	0.95
MSTRG.313133	gene5184	0.95
MSTRG.313133	gene5357	0.95
MSTRG.313133	gene5837	0.95
MSTRG.313133	gene5863	0.9667
MSTRG.313133	gene5951	-0.9667
MSTRG.313133	gene600	0.95
MSTRG.313133	gene6050	-0.9833
MSTRG.313133	gene6188	0.9667
MSTRG.313133	gene6216	0.9833
MSTRG.313133	gene6625	-0.95
MSTRG.313133	gene6753	0.9667
MSTRG.313133	gene6946	-0.9667
MSTRG.313133	gene6965	0.95
MSTRG.313133	gene7547	0.9833
MSTRG.313133	gene776	-0.95
MSTRG.313133	gene7763	0.95
MSTRG.313133	gene7888	0.95
MSTRG.313133	gene7895	1
MSTRG.313133	gene7918	0.9833
MSTRG.313133	gene7936	0.95
MSTRG.313133	gene7982	0.9667
MSTRG.313133	gene8586	-0.9667
MSTRG.313133	gene9402	-0.9667
MSTRG.313133	gene9403	0.9833
MSTRG.317550	gene12564	0.9833
MSTRG.317550	gene26487	-0.95
MSTRG.317550	gene6552	-0.9833
MSTRG.317550	gene7914	-0.9667
MSTRG.317551	gene7914	-0.9833
MSTRG.35463	gene10066	0.95
MSTRG.35463	gene10217	0.95
MSTRG.35463	gene10313	-0.9667
MSTRG.35463	gene10513	0.95
MSTRG.35463	gene10823	0.9667
MSTRG.35463	gene11633	0.95
MSTRG.35463	gene11879	-0.95
MSTRG.35463	gene11953	-0.95
MSTRG.35463	gene11993	-0.9667
MSTRG.35463	gene12406	-0.95
MSTRG.35463	gene12412	0.95
MSTRG.35463	gene12459	-0.95
MSTRG.35463	gene13270	0.95
MSTRG.35463	gene13319	0.9833
MSTRG.35463	gene14298	0.95
MSTRG.35463	gene14531	0.95
MSTRG.35463	gene1460	0.95
MSTRG.35463	gene14648	0.95
MSTRG.35463	gene15049	0.9667
MSTRG.35463	gene15050	0.95
MSTRG.35463	gene15056	0.9667
MSTRG.35463	gene15071	0.95
MSTRG.35463	gene15849	-0.95
MSTRG.35463	gene15905	0.9833
MSTRG.35463	gene16658	0.9667
MSTRG.35463	gene16946	0.9833
MSTRG.35463	gene1707	0.9667
MSTRG.35463	gene1714	0.95
MSTRG.35463	gene17771	0.95
MSTRG.35463	gene18581	0.9833
MSTRG.35463	gene20184	0.95
MSTRG.35463	gene20213	0.9833
MSTRG.35463	gene20310	-0.9667
MSTRG.35463	gene20584	-0.9833
MSTRG.35463	gene20585	0.95
MSTRG.35463	gene20897	-0.95
MSTRG.35463	gene20904	-0.9833
MSTRG.35463	gene21508	0.9833
MSTRG.35463	gene21579	-0.9833
MSTRG.35463	gene22777	0.9667
MSTRG.35463	gene23705	0.95
MSTRG.35463	gene23763	0.9667
MSTRG.35463	gene24235	0.95
MSTRG.35463	gene24330	0.95
MSTRG.35463	gene2457	-0.9667
MSTRG.35463	gene25201	0.95
MSTRG.35463	gene25292	-0.95
MSTRG.35463	gene2567	-0.95
MSTRG.35463	gene26284	0.95
MSTRG.35463	gene27007	0.95
MSTRG.35463	gene27242	0.95
MSTRG.35463	gene27783	-0.95
MSTRG.35463	gene28319	0.95
MSTRG.35463	gene3073	-0.95
MSTRG.35463	gene3092	-0.9833
MSTRG.35463	gene4319	0.95
MSTRG.35463	gene4419	-0.9667
MSTRG.35463	gene4421	-0.95
MSTRG.35463	gene4604	0.9667
MSTRG.35463	gene4816	0.9667
MSTRG.35463	gene572	0.9667
MSTRG.35463	gene5748	-0.9667
MSTRG.35463	gene5837	-0.95
MSTRG.35463	gene6214	-0.9833
MSTRG.35463	gene6434	-0.9667
MSTRG.35463	gene6521	0.9667
MSTRG.35463	gene6959	0.9667
MSTRG.35463	gene6965	-0.95
MSTRG.35463	gene7189	0.95
MSTRG.35463	gene7201	-0.9833
MSTRG.35463	gene7210	0.9833
MSTRG.35463	gene7255	0.9667
MSTRG.35463	gene7357	0.9667
MSTRG.35463	gene8388	-0.9667
MSTRG.35463	gene918	0.9667
MSTRG.35576	gene4225	-0.9574
MSTRG.367295	gene10864	-0.9667
MSTRG.367295	gene11193	-0.9667
MSTRG.367295	gene14370	-0.95
MSTRG.367295	gene14479	0.9833
MSTRG.367295	gene1474	0.9667
MSTRG.367295	gene16289	-0.95
MSTRG.367295	gene16590	0.9667
MSTRG.367295	gene16595	-0.95
MSTRG.367295	gene1749	0.95
MSTRG.367295	gene22237	-0.9667
MSTRG.367295	gene2345	-0.95
MSTRG.367295	gene23540	-0.9667
MSTRG.367295	gene2644	0.95
MSTRG.367295	gene27486	-0.95
MSTRG.367295	gene28579	0.95
MSTRG.367295	gene330	-0.95
MSTRG.367295	gene367	-0.95
MSTRG.367295	gene5300	-0.9667
MSTRG.367295	gene5390	0.9667
MSTRG.367295	gene5402	0.9667
MSTRG.367295	gene5643	-0.9667
MSTRG.367295	gene6068	0.9833
MSTRG.367295	gene7907	-0.95
MSTRG.367295	gene8848	-0.95
MSTRG.367295	gene9756	-0.9667
MSTRG.367295	gene9927	-0.95
MSTRG.371421	gene10227	0.9667
MSTRG.371421	gene10556	-0.9667
MSTRG.371421	gene10582	0.9833
MSTRG.371421	gene12359	-0.9833
MSTRG.371421	gene12763	-0.9667
MSTRG.371421	gene12860	0.95
MSTRG.371421	gene13406	0.9667
MSTRG.371421	gene13485	0.95
MSTRG.371421	gene13537	-0.9667
MSTRG.371421	gene13883	-0.9667
MSTRG.371421	gene15312	0.9833
MSTRG.371421	gene16601	0.95
MSTRG.371421	gene1715	0.95
MSTRG.371421	gene1759	0.95
MSTRG.371421	gene18947	0.95
MSTRG.371421	gene19057	0.9667
MSTRG.371421	gene1946	0.9667
MSTRG.371421	gene1975	0.9667
MSTRG.371421	gene20411	-0.9667
MSTRG.371421	gene2111	0.9667
MSTRG.371421	gene22009	0.9667
MSTRG.371421	gene22075	-0.95
MSTRG.371421	gene22251	-0.95
MSTRG.371421	gene22300	0.95
MSTRG.371421	gene24868	0.9833
MSTRG.371421	gene25130	0.9667
MSTRG.371421	gene26497	-0.95
MSTRG.371421	gene26867	-0.9833
MSTRG.371421	gene26886	-0.9667
MSTRG.371421	gene27096	0.9667
MSTRG.371421	gene28099	-0.9667
MSTRG.371421	gene28200	-0.9833
MSTRG.371421	gene28311	-0.9667
MSTRG.371421	gene412	0.9667
MSTRG.371421	gene4220	0.95
MSTRG.371421	gene4323	0.95
MSTRG.371421	gene4331	0.95
MSTRG.371421	gene5797	-0.95
MSTRG.371421	gene7136	-1
MSTRG.371421	gene7761	-0.95
MSTRG.371421	gene7856	0.9833
MSTRG.371421	gene8410	0.95
MSTRG.371421	gene9387	0.9833
MSTRG.375584	gene10812	0.954
MSTRG.375584	gene11048	0.9791
MSTRG.375584	gene11912	0.954
MSTRG.375584	gene13889	0.954
MSTRG.375584	gene15318	0.954
MSTRG.375584	gene22059	0.9958
MSTRG.375584	gene23896	0.9624
MSTRG.375584	gene27283	0.954
MSTRG.375584	gene27502	0.954
MSTRG.375584	gene2769	0.954
MSTRG.375584	gene3160	0.9791
MSTRG.39383	gene5899	0.9662
MSTRG.39383	gene7984	0.9662
MSTRG.397674	gene10313	-0.9662
MSTRG.397674	gene11190	-0.9662
MSTRG.397674	gene11877	-0.9662
MSTRG.397674	gene12006	-0.9662
MSTRG.397674	gene12246	0.9832
MSTRG.397674	gene1248	0.9832
MSTRG.397674	gene12710	0.9662
MSTRG.397674	gene12816	-0.9662
MSTRG.397674	gene13552	-0.9662
MSTRG.397674	gene13963	0.9832
MSTRG.397674	gene14098	-0.9662
MSTRG.397674	gene15156	-0.9662
MSTRG.397674	gene15367	0.9662
MSTRG.397674	gene16197	-0.9662
MSTRG.397674	gene19225	-0.9662
MSTRG.397674	gene19680	0.9662
MSTRG.397674	gene19780	-0.9662
MSTRG.397674	gene20310	-0.9662
MSTRG.397674	gene20422	0.9832
MSTRG.397674	gene21724	0.9662
MSTRG.397674	gene21851	-0.9832
MSTRG.397674	gene22751	-0.9832
MSTRG.397674	gene23025	0.9832
MSTRG.397674	gene23671	0.9662
MSTRG.397674	gene24976	-0.9662
MSTRG.397674	gene25007	-0.9662
MSTRG.397674	gene25128	-0.9832
MSTRG.397674	gene25202	0.9662
MSTRG.397674	gene25256	-0.9662
MSTRG.397674	gene25401	0.9662
MSTRG.397674	gene26986	0.9662
MSTRG.397674	gene2774	-0.9662
MSTRG.397674	gene28377	-0.9662
MSTRG.397674	gene3195	-0.9662
MSTRG.397674	gene3434	0.9662
MSTRG.397674	gene3459	0.9662
MSTRG.397674	gene3940	-0.9662
MSTRG.397674	gene4164	-0.9832
MSTRG.397674	gene4279	0.9662
MSTRG.397674	gene4604	0.9662
MSTRG.397674	gene5772	-0.9662
MSTRG.397674	gene632	-0.9832
MSTRG.397674	gene8142	-0.9662
MSTRG.397674	gene9413	0.9662
MSTRG.397674	gene9880	-0.9832
MSTRG.404162	gene10478	-0.9667
MSTRG.404162	gene12669	-0.9833
MSTRG.404162	gene13513	-0.9667
MSTRG.404162	gene16646	-0.95
MSTRG.404162	gene20933	-0.95
MSTRG.404162	gene22898	-0.95
MSTRG.404162	gene6704	0.95
MSTRG.404162	gene8672	-0.95
MSTRG.407603	gene10313	-0.9662
MSTRG.407603	gene11190	-0.9662
MSTRG.407603	gene11877	-0.9662
MSTRG.407603	gene12006	-0.9662
MSTRG.407603	gene12246	0.9832
MSTRG.407603	gene1248	0.9832
MSTRG.407603	gene12710	0.9662
MSTRG.407603	gene12816	-0.9662
MSTRG.407603	gene13552	-0.9662
MSTRG.407603	gene13963	0.9832
MSTRG.407603	gene14098	-0.9662
MSTRG.407603	gene15156	-0.9662
MSTRG.407603	gene15367	0.9662
MSTRG.407603	gene16197	-0.9662
MSTRG.407603	gene19225	-0.9662
MSTRG.407603	gene19680	0.9662
MSTRG.407603	gene19780	-0.9662
MSTRG.407603	gene20310	-0.9662
MSTRG.407603	gene20422	0.9832
MSTRG.407603	gene21724	0.9662
MSTRG.407603	gene21851	-0.9832
MSTRG.407603	gene22751	-0.9832
MSTRG.407603	gene23025	0.9832
MSTRG.407603	gene23671	0.9662
MSTRG.407603	gene24976	-0.9662
MSTRG.407603	gene25007	-0.9662
MSTRG.407603	gene25128	-0.9832
MSTRG.407603	gene25202	0.9662
MSTRG.407603	gene25256	-0.9662
MSTRG.407603	gene25401	0.9662
MSTRG.407603	gene26986	0.9662
MSTRG.407603	gene2774	-0.9662
MSTRG.407603	gene28377	-0.9662
MSTRG.407603	gene3195	-0.9662
MSTRG.407603	gene3434	0.9662
MSTRG.407603	gene3459	0.9662
MSTRG.407603	gene3940	-0.9662
MSTRG.407603	gene4164	-0.9832
MSTRG.407603	gene4279	0.9662
MSTRG.407603	gene4604	0.9662
MSTRG.407603	gene5772	-0.9662
MSTRG.407603	gene632	-0.9832
MSTRG.407603	gene8142	-0.9662
MSTRG.407603	gene9413	0.9662
MSTRG.407603	gene9880	-0.9832
MSTRG.411471	gene10389	-0.9833
MSTRG.411471	gene10762	0.95
MSTRG.411471	gene14370	-0.9667
MSTRG.411471	gene1474	0.95
MSTRG.411471	gene18366	-0.95
MSTRG.411471	gene20919	-0.9667
MSTRG.411471	gene2156	-0.95
MSTRG.411471	gene2345	-0.95
MSTRG.411471	gene2644	0.95
MSTRG.411471	gene26644	-0.95
MSTRG.411471	gene27423	-0.95
MSTRG.411471	gene28279	-0.9667
MSTRG.411471	gene367	-0.95
MSTRG.411471	gene561	-0.95
MSTRG.411471	gene6268	-0.9833
MSTRG.411471	gene7649	0.95
MSTRG.411471	gene7907	-0.95
MSTRG.411471	gene9908	-0.95
MSTRG.411471	gene9927	-0.95
MSTRG.411762	gene11953	-0.9833
MSTRG.411762	gene15032	0.9667
MSTRG.411762	gene15761	-0.95
MSTRG.411762	gene21579	-0.95
MSTRG.411762	gene23786	-0.9833
MSTRG.411762	gene26544	-0.95
MSTRG.411762	gene5802	0.95
MSTRG.411762	gene5991	0.95
MSTRG.411762	gene982	-0.95
MSTRG.411827	gene10455	-0.9791
MSTRG.411827	gene10699	-0.9791
MSTRG.411827	gene11952	-0.9791
MSTRG.411827	gene12714	-0.9958
MSTRG.411827	gene13680	0.9624
MSTRG.411827	gene14370	-0.9707
MSTRG.411827	gene1474	0.9791
MSTRG.411827	gene15235	-0.9624
MSTRG.411827	gene15439	-0.9624
MSTRG.411827	gene16077	-0.9791
MSTRG.411827	gene16364	-0.9624
MSTRG.411827	gene1865	-0.9624
MSTRG.411827	gene18998	-0.9624
MSTRG.411827	gene20439	-0.9624
MSTRG.411827	gene20951	-0.9624
MSTRG.411827	gene22102	-0.9791
MSTRG.411827	gene23001	-0.954
MSTRG.411827	gene2409	-0.9624
MSTRG.411827	gene4218	-0.9791
MSTRG.411827	gene644	-0.9791
MSTRG.411827	gene7813	-0.954
MSTRG.411827	gene8800	-0.9791
MSTRG.411827	gene9467	-0.9791
MSTRG.421193	gene10153	-0.9791
MSTRG.421193	gene10185	0.9624
MSTRG.421193	gene10351	-0.9624
MSTRG.421193	gene10693	-0.9624
MSTRG.421193	gene10871	-0.9624
MSTRG.421193	gene11142	-0.9791
MSTRG.421193	gene11190	-0.9624
MSTRG.421193	gene11877	-0.9624
MSTRG.421193	gene11899	-0.9791
MSTRG.421193	gene12320	0.9624
MSTRG.421193	gene12459	-0.9791
MSTRG.421193	gene12764	-0.954
MSTRG.421193	gene12816	-0.9624
MSTRG.421193	gene12974	-0.9624
MSTRG.421193	gene12992	-0.9791
MSTRG.421193	gene13935	-0.9624
MSTRG.421193	gene13953	-0.9624
MSTRG.421193	gene14247	-0.9624
MSTRG.421193	gene1460	0.9791
MSTRG.421193	gene15037	0.9624
MSTRG.421193	gene15156	-0.9624
MSTRG.421193	gene15918	-0.9791
MSTRG.421193	gene1612	-0.9624
MSTRG.421193	gene16197	-0.9624
MSTRG.421193	gene16201	0.9624
MSTRG.421193	gene16693	-0.9624
MSTRG.421193	gene16747	-0.9624
MSTRG.421193	gene17094	-0.9624
MSTRG.421193	gene17806	-0.9791
MSTRG.421193	gene17964	-0.9958
MSTRG.421193	gene1881	-0.9791
MSTRG.421193	gene19726	-0.9791
MSTRG.421193	gene19734	-0.954
MSTRG.421193	gene20184	0.9791
MSTRG.421193	gene20670	-0.9624
MSTRG.421193	gene20702	-0.9624
MSTRG.421193	gene20707	-0.9624
MSTRG.421193	gene20897	-0.9791
MSTRG.421193	gene2124	0.9624
MSTRG.421193	gene21795	-0.9624
MSTRG.421193	gene2196	0.954
MSTRG.421193	gene2296	-0.954
MSTRG.421193	gene23804	-0.9791
MSTRG.421193	gene2393	-0.9791
MSTRG.421193	gene25007	-0.9624
MSTRG.421193	gene2502	-0.9791
MSTRG.421193	gene25202	0.9624
MSTRG.421193	gene2521	0.9624
MSTRG.421193	gene25269	-0.9624
MSTRG.421193	gene25284	-0.9624
MSTRG.421193	gene25292	-0.9791
MSTRG.421193	gene25306	-0.9624
MSTRG.421193	gene25438	0.9624
MSTRG.421193	gene25569	-0.9624
MSTRG.421193	gene26880	-0.9624
MSTRG.421193	gene26986	0.9624
MSTRG.421193	gene27227	-0.9791
MSTRG.421193	gene28157	-0.9624
MSTRG.421193	gene28264	-0.9791
MSTRG.421193	gene28377	-0.9624
MSTRG.421193	gene2944	-0.9791
MSTRG.421193	gene3082	0.9791
MSTRG.421193	gene3459	0.9624
MSTRG.421193	gene3543	-0.9624
MSTRG.421193	gene3842	-0.9791
MSTRG.421193	gene4103	-0.9624
MSTRG.421193	gene4302	-0.9791
MSTRG.421193	gene4562	-0.9791
MSTRG.421193	gene5786	-0.9624
MSTRG.421193	gene5837	-0.9791
MSTRG.421193	gene5853	-0.9958
MSTRG.421193	gene5863	-0.9624
MSTRG.421193	gene6050	0.9624
MSTRG.421193	gene6187	-0.9624
MSTRG.421193	gene6216	-0.9624
MSTRG.421193	gene6946	0.9791
MSTRG.421193	gene6965	-0.9791
MSTRG.421193	gene701	-0.9791
MSTRG.421193	gene7547	-0.9624
MSTRG.421193	gene7936	-0.9958
MSTRG.421193	gene7982	-0.9791
MSTRG.421193	gene9402	0.9791
MSTRG.421193	gene9403	-0.9624
MSTRG.421193	gene9785	-0.9624
MSTRG.421196	gene10508	-0.9662
MSTRG.421196	gene11266	-0.9662
MSTRG.421196	gene13721	0.9662
MSTRG.421196	gene15009	0.9662
MSTRG.421196	gene2361	-0.9662
MSTRG.421196	gene24816	-0.9662
MSTRG.421196	gene26950	0.9662
MSTRG.421196	gene6445	-0.9662
MSTRG.421196	gene7110	0.9662
MSTRG.421324	gene1008	-0.9833
MSTRG.421324	gene10217	0.9833
MSTRG.421324	gene10313	-0.9667
MSTRG.421324	gene10513	0.95
MSTRG.421324	gene1057	0.95
MSTRG.421324	gene10590	0.95
MSTRG.421324	gene10823	0.9667
MSTRG.421324	gene11287	-0.9667
MSTRG.421324	gene11833	0.95
MSTRG.421324	gene11865	0.95
MSTRG.421324	gene12050	0.9667
MSTRG.421324	gene1226	0.9667
MSTRG.421324	gene12412	0.9833
MSTRG.421324	gene13270	0.9833
MSTRG.421324	gene13389	0.95
MSTRG.421324	gene13548	0.95
MSTRG.421324	gene14098	-0.95
MSTRG.421324	gene14298	0.95
MSTRG.421324	gene14531	0.9833
MSTRG.421324	gene15039	0.9833
MSTRG.421324	gene15040	0.95
MSTRG.421324	gene15041	0.95
MSTRG.421324	gene15045	0.9667
MSTRG.421324	gene15049	1
MSTRG.421324	gene15050	0.9833
MSTRG.421324	gene15051	0.95
MSTRG.421324	gene15056	1
MSTRG.421324	gene15069	0.9833
MSTRG.421324	gene15071	0.9833
MSTRG.421324	gene16658	0.95
MSTRG.421324	gene16946	0.9833
MSTRG.421324	gene1707	1
MSTRG.421324	gene1712	0.9833
MSTRG.421324	gene1714	0.9667
MSTRG.421324	gene17198	0.9833
MSTRG.421324	gene17655	0.9833
MSTRG.421324	gene18009	0.9667
MSTRG.421324	gene18010	0.9667
MSTRG.421324	gene18011	0.95
MSTRG.421324	gene18174	0.9667
MSTRG.421324	gene18581	0.9833
MSTRG.421324	gene1896	0.9667
MSTRG.421324	gene1925	-0.9833
MSTRG.421324	gene1961	-0.95
MSTRG.421324	gene20213	0.9833
MSTRG.421324	gene20585	0.9833
MSTRG.421324	gene20659	0.9667
MSTRG.421324	gene20904	-0.95
MSTRG.421324	gene2133	0.9833
MSTRG.421324	gene21508	0.9833
MSTRG.421324	gene21579	-0.95
MSTRG.421324	gene22205	0.9667
MSTRG.421324	gene22396	0.9833
MSTRG.421324	gene22777	0.9667
MSTRG.421324	gene23223	0.95
MSTRG.421324	gene2357	0.9667
MSTRG.421324	gene23763	1
MSTRG.421324	gene23831	0.9667
MSTRG.421324	gene2428	0.9667
MSTRG.421324	gene2431	0.95
MSTRG.421324	gene2457	-1
MSTRG.421324	gene24621	0.95
MSTRG.421324	gene2464	0.9833
MSTRG.421324	gene24666	0.9833
MSTRG.421324	gene24698	0.9667
MSTRG.421324	gene25419	0.9667
MSTRG.421324	gene25847	0.9667
MSTRG.421324	gene25852	0.9833
MSTRG.421324	gene2611	0.95
MSTRG.421324	gene26681	0.95
MSTRG.421324	gene26772	0.95
MSTRG.421324	gene27099	0.9667
MSTRG.421324	gene27150	-0.95
MSTRG.421324	gene27276	-0.95
MSTRG.421324	gene27674	-0.9667
MSTRG.421324	gene27828	0.95
MSTRG.421324	gene28211	0.95
MSTRG.421324	gene3073	-0.95
MSTRG.421324	gene3092	-0.95
MSTRG.421324	gene3293	0.9833
MSTRG.421324	gene3410	0.95
MSTRG.421324	gene3434	0.95
MSTRG.421324	gene3446	0.9667
MSTRG.421324	gene3472	-0.9667
MSTRG.421324	gene360	-0.95
MSTRG.421324	gene3843	-0.9667
MSTRG.421324	gene4010	0.9667
MSTRG.421324	gene4279	0.95
MSTRG.421324	gene4319	0.9667
MSTRG.421324	gene4604	0.9667
MSTRG.421324	gene4816	0.9667
MSTRG.421324	gene572	0.95
MSTRG.421324	gene5748	-1
MSTRG.421324	gene5802	0.95
MSTRG.421324	gene6142	-0.9667
MSTRG.421324	gene6151	0.95
MSTRG.421324	gene6214	-0.9833
MSTRG.421324	gene6291	0.9833
MSTRG.421324	gene6379	0.95
MSTRG.421324	gene6380	0.9667
MSTRG.421324	gene6434	-0.9667
MSTRG.421324	gene6521	0.95
MSTRG.421324	gene6602	0.9833
MSTRG.421324	gene6641	0.9833
MSTRG.421324	gene6959	1
MSTRG.421324	gene7210	0.9833
MSTRG.421324	gene7255	0.9667
MSTRG.421324	gene7357	0.9667
MSTRG.421324	gene780	0.95
MSTRG.421324	gene785	0.95
MSTRG.421324	gene7894	-0.9667
MSTRG.421324	gene8031	0.9667
MSTRG.421324	gene8133	0.9667
MSTRG.421324	gene8388	-0.95
MSTRG.421324	gene8659	0.9667
MSTRG.421324	gene9420	0.9833
MSTRG.421324	gene9804	0.9667
MSTRG.421324	gene982	-0.95
MSTRG.421324	gene9982	0.95
MSTRG.421537	gene21797	0.9624
MSTRG.421537	gene24628	0.9624
MSTRG.421537	gene6051	0.9624
MSTRG.427451	gene13303	-0.9574
MSTRG.427451	gene1876	-0.9574
MSTRG.427451	gene23625	-0.9574
MSTRG.427451	gene28153	-0.9574
MSTRG.427451	gene4232	0.9574
MSTRG.427451	gene4445	-0.9574
MSTRG.427451	gene5322	0.9574
MSTRG.427451	gene5536	-0.9574
MSTRG.427451	gene6958	-0.9574
MSTRG.437735	gene11341	-0.95
MSTRG.437735	gene12194	-0.9667
MSTRG.437735	gene12313	-0.95
MSTRG.437735	gene1232	0.9667
MSTRG.437735	gene13210	-0.95
MSTRG.437735	gene13280	0.9667
MSTRG.437735	gene13340	-0.9667
MSTRG.437735	gene13398	-0.95
MSTRG.437735	gene13445	0.9667
MSTRG.437735	gene13464	0.95
MSTRG.437735	gene13591	0.9667
MSTRG.437735	gene13977	0.95
MSTRG.437735	gene14213	-0.95
MSTRG.437735	gene14414	-0.95
MSTRG.437735	gene14472	-0.9667
MSTRG.437735	gene14985	-0.9667
MSTRG.437735	gene15709	-0.95
MSTRG.437735	gene16612	0.95
MSTRG.437735	gene16951	-0.95
MSTRG.437735	gene17095	-0.9667
MSTRG.437735	gene17288	-0.9667
MSTRG.437735	gene17463	-0.9833
MSTRG.437735	gene19137	-0.9667
MSTRG.437735	gene21096	-0.9667
MSTRG.437735	gene21339	-0.9667
MSTRG.437735	gene22006	-0.9667
MSTRG.437735	gene22374	-0.95
MSTRG.437735	gene23029	-0.9667
MSTRG.437735	gene23112	-0.95
MSTRG.437735	gene24215	-0.95
MSTRG.437735	gene256	-0.9667
MSTRG.437735	gene25706	-0.95
MSTRG.437735	gene25856	-0.9667
MSTRG.437735	gene25898	-0.9833
MSTRG.437735	gene26075	-0.9667
MSTRG.437735	gene26388	-0.9833
MSTRG.437735	gene2704	-0.95
MSTRG.437735	gene27722	-0.9833
MSTRG.437735	gene2892	-0.95
MSTRG.437735	gene3713	-0.9667
MSTRG.437735	gene3899	-0.95
MSTRG.437735	gene4555	-0.95
MSTRG.437735	gene457	-0.9667
MSTRG.437735	gene4673	-0.95
MSTRG.437735	gene4774	-0.95
MSTRG.437735	gene4858	-0.9667
MSTRG.437735	gene595	-1
MSTRG.437735	gene6196	0.95
MSTRG.437735	gene6967	-0.9667
MSTRG.437735	gene775	0.95
MSTRG.437735	gene783	-0.95
MSTRG.437735	gene8105	-0.95
MSTRG.437735	gene8169	-0.95
MSTRG.437735	gene8372	-0.9667
MSTRG.437735	gene8386	-0.9667
MSTRG.437735	gene8681	-0.9833
MSTRG.437735	gene9138	-0.95
MSTRG.439165	gene11188	-0.9667
MSTRG.439165	gene12156	-0.9667
MSTRG.439165	gene14667	-0.95
MSTRG.439165	gene20979	-0.95
MSTRG.439165	gene24901	-0.9667
MSTRG.439165	gene6632	-0.95
MSTRG.439165	gene7757	-0.95
MSTRG.447490	gene10590	0.9662
MSTRG.447490	gene10664	0.9662
MSTRG.447490	gene10719	0.9662
MSTRG.447490	gene10929	0.9662
MSTRG.447490	gene11821	0.9662
MSTRG.447490	gene11853	0.9662
MSTRG.447490	gene1203	0.9662
MSTRG.447490	gene1229	0.9832
MSTRG.447490	gene1233	0.9832
MSTRG.447490	gene12525	0.9662
MSTRG.447490	gene1263	0.9832
MSTRG.447490	gene13306	0.9662
MSTRG.447490	gene13459	0.9662
MSTRG.447490	gene13913	0.9662
MSTRG.447490	gene15040	0.9662
MSTRG.447490	gene15041	0.9662
MSTRG.447490	gene15051	0.9662
MSTRG.447490	gene15072	0.9662
MSTRG.447490	gene15081	0.9662
MSTRG.447490	gene15299	0.9662
MSTRG.447490	gene15576	0.9662
MSTRG.447490	gene15578	0.9832
MSTRG.447490	gene1703	0.9662
MSTRG.447490	gene17730	0.9662
MSTRG.447490	gene19769	0.9662
MSTRG.447490	gene20256	0.9662
MSTRG.447490	gene21210	0.9662
MSTRG.447490	gene2138	0.9832
MSTRG.447490	gene23027	0.9832
MSTRG.447490	gene24430	0.9662
MSTRG.447490	gene24525	-0.9832
MSTRG.447490	gene24804	0.9662
MSTRG.447490	gene24858	-0.9662
MSTRG.447490	gene25129	0.9832
MSTRG.447490	gene25472	0.9832
MSTRG.447490	gene26772	0.9662
MSTRG.447490	gene3878	0.9662
MSTRG.447490	gene4250	0.9662
MSTRG.447490	gene4441	0.9662
MSTRG.447490	gene4448	0.9662
MSTRG.447490	gene447	0.9662
MSTRG.447490	gene5315	0.9832
MSTRG.447490	gene5352	0.9832
MSTRG.447490	gene5673	0.9662
MSTRG.447490	gene6126	0.9662
MSTRG.447490	gene6304	-0.9662
MSTRG.447490	gene6358	0.9662
MSTRG.447490	gene6369	0.9832
MSTRG.447490	gene6378	0.9662
MSTRG.447490	gene6379	0.9662
MSTRG.44954	gene1008	-0.9667
MSTRG.44954	gene10153	-0.95
MSTRG.44954	gene10217	0.9667
MSTRG.44954	gene10313	-0.9833
MSTRG.44954	gene10823	0.95
MSTRG.44954	gene11857	-0.95
MSTRG.44954	gene12246	0.95
MSTRG.44954	gene1226	0.95
MSTRG.44954	gene12370	-0.95
MSTRG.44954	gene12412	0.9667
MSTRG.44954	gene12459	-0.9667
MSTRG.44954	gene12992	-0.95
MSTRG.44954	gene13270	0.9667
MSTRG.44954	gene13319	0.95
MSTRG.44954	gene13963	0.95
MSTRG.44954	gene14050	-0.95
MSTRG.44954	gene14098	-0.9667
MSTRG.44954	gene14531	0.9667
MSTRG.44954	gene1460	0.9667
MSTRG.44954	gene15039	0.95
MSTRG.44954	gene15049	0.9833
MSTRG.44954	gene15050	0.9667
MSTRG.44954	gene15056	0.9833
MSTRG.44954	gene15069	0.95
MSTRG.44954	gene15071	0.9667
MSTRG.44954	gene15905	0.95
MSTRG.44954	gene15918	-0.95
MSTRG.44954	gene16946	0.9667
MSTRG.44954	gene1707	0.9833
MSTRG.44954	gene1712	0.9667
MSTRG.44954	gene17198	0.95
MSTRG.44954	gene17655	0.95
MSTRG.44954	gene17806	-0.95
MSTRG.44954	gene18581	1
MSTRG.44954	gene1881	-0.95
MSTRG.44954	gene1925	-0.95
MSTRG.44954	gene20184	0.9667
MSTRG.44954	gene20213	0.9667
MSTRG.44954	gene20265	-0.95
MSTRG.44954	gene20339	-0.95
MSTRG.44954	gene20449	-0.95
MSTRG.44954	gene20584	-0.95
MSTRG.44954	gene20585	0.9667
MSTRG.44954	gene20897	-0.9667
MSTRG.44954	gene20904	-0.9667
MSTRG.44954	gene2133	0.9667
MSTRG.44954	gene21344	-0.95
MSTRG.44954	gene21508	0.9667
MSTRG.44954	gene21579	-0.9667
MSTRG.44954	gene21795	-0.95
MSTRG.44954	gene22396	0.95
MSTRG.44954	gene22777	0.9833
MSTRG.44954	gene23763	0.9833
MSTRG.44954	gene2457	-0.9833
MSTRG.44954	gene2464	0.95
MSTRG.44954	gene24666	0.95
MSTRG.44954	gene25292	-0.9667
MSTRG.44954	gene25438	0.95
MSTRG.44954	gene25852	0.95
MSTRG.44954	gene27099	0.95
MSTRG.44954	gene2928	-0.95
MSTRG.44954	gene3092	-0.9667
MSTRG.44954	gene3293	0.95
MSTRG.44954	gene3446	0.95
MSTRG.44954	gene3843	-0.95
MSTRG.44954	gene4421	-0.9667
MSTRG.44954	gene4604	0.9833
MSTRG.44954	gene4816	0.95
MSTRG.44954	gene559	-0.9667
MSTRG.44954	gene5748	-0.9833
MSTRG.44954	gene5837	-0.9667
MSTRG.44954	gene6214	-0.9667
MSTRG.44954	gene6291	0.95
MSTRG.44954	gene6380	0.95
MSTRG.44954	gene6434	-0.9833
MSTRG.44954	gene6602	0.9667
MSTRG.44954	gene6641	0.95
MSTRG.44954	gene6959	0.9833
MSTRG.44954	gene6965	-0.9667
MSTRG.44954	gene7189	0.9667
MSTRG.44954	gene7201	-0.9667
MSTRG.44954	gene7210	0.9667
MSTRG.44954	gene7255	0.9833
MSTRG.44954	gene7357	0.9833
MSTRG.44954	gene748	-0.95
MSTRG.44954	gene7982	-0.95
MSTRG.44954	gene8031	0.95
MSTRG.44954	gene8133	0.95
MSTRG.44954	gene8388	-0.9833
MSTRG.44954	gene848	-0.95
MSTRG.44954	gene939	0.95
MSTRG.44954	gene9420	0.9667
MSTRG.44954	gene9880	-0.95
MSTRG.450058	gene11681	0.9662
MSTRG.450058	gene22959	0.9662
MSTRG.450058	gene3824	0.9832
MSTRG.458413	gene10066	0.9832
MSTRG.458413	gene1008	-0.9662
MSTRG.458413	gene1057	0.9662
MSTRG.458413	gene11198	0.9662
MSTRG.458413	gene11833	0.9662
MSTRG.458413	gene12056	0.9662
MSTRG.458413	gene12163	-0.9832
MSTRG.458413	gene12406	-0.9832
MSTRG.458413	gene12520	0.9662
MSTRG.458413	gene12719	0.9662
MSTRG.458413	gene12722	0.9662
MSTRG.458413	gene13604	0.9662
MSTRG.458413	gene14065	0.9662
MSTRG.458413	gene14356	0.9662
MSTRG.458413	gene15049	0.9662
MSTRG.458413	gene15056	0.9662
MSTRG.458413	gene16655	0.9662
MSTRG.458413	gene16658	0.9662
MSTRG.458413	gene16946	0.9662
MSTRG.458413	gene1707	0.9662
MSTRG.458413	gene1712	0.9662
MSTRG.458413	gene17705	0.9832
MSTRG.458413	gene18600	0.9662
MSTRG.458413	gene19708	0.9662
MSTRG.458413	gene20213	0.9662
MSTRG.458413	gene20585	0.9832
MSTRG.458413	gene20904	-0.9662
MSTRG.458413	gene2122	0.9662
MSTRG.458413	gene2133	0.9662
MSTRG.458413	gene21508	0.9662
MSTRG.458413	gene22777	0.9662
MSTRG.458413	gene23763	0.9662
MSTRG.458413	gene2457	-0.9662
MSTRG.458413	gene25076	0.9662
MSTRG.458413	gene25847	0.9662
MSTRG.458413	gene2611	0.9662
MSTRG.458413	gene26284	0.9832
MSTRG.458413	gene27242	0.9832
MSTRG.458413	gene28211	0.9662
MSTRG.458413	gene3092	-0.9662
MSTRG.458413	gene354	-0.9662
MSTRG.458413	gene4070	0.9662
MSTRG.458413	gene572	0.9662
MSTRG.458413	gene5748	-0.9662
MSTRG.458413	gene6151	0.9662
MSTRG.458413	gene6214	-0.9662
MSTRG.458413	gene6371	0.9832
MSTRG.458413	gene6434	-0.9662
MSTRG.458413	gene6521	0.9662
MSTRG.458413	gene6602	0.9662
MSTRG.458413	gene6959	0.9662
MSTRG.458413	gene6974	0.9662
MSTRG.458413	gene7210	0.9662
MSTRG.458413	gene7357	0.9662
MSTRG.458413	gene785	0.9662
MSTRG.458413	gene7894	-0.9662
MSTRG.458413	gene8133	0.9832
MSTRG.458413	gene851	0.9662
MSTRG.458413	gene9420	0.9662
MSTRG.474533	gene11498	-0.95
MSTRG.474533	gene14868	-0.95
MSTRG.474533	gene1966	-0.95
MSTRG.474533	gene20349	-0.95
MSTRG.474533	gene2345	-0.9667
MSTRG.474533	gene24407	-1
MSTRG.474533	gene3328	-0.95
MSTRG.474533	gene367	-0.9667
MSTRG.474533	gene5468	-0.95
MSTRG.474533	gene5879	-0.95
MSTRG.474533	gene6255	-0.95
MSTRG.474533	gene7108	-1
MSTRG.474533	gene7312	-0.95
MSTRG.474537	gene10185	0.95
MSTRG.474537	gene10313	-0.95
MSTRG.474537	gene11190	-0.95
MSTRG.474537	gene11992	-0.95
MSTRG.474537	gene12246	0.9667
MSTRG.474537	gene1226	0.95
MSTRG.474537	gene12816	-0.95
MSTRG.474537	gene12817	-0.95
MSTRG.474537	gene13	-0.9833
MSTRG.474537	gene13552	-0.95
MSTRG.474537	gene13926	-0.95
MSTRG.474537	gene13963	0.9667
MSTRG.474537	gene14098	-0.9667
MSTRG.474537	gene15761	-0.95
MSTRG.474537	gene16197	-0.95
MSTRG.474537	gene18111	-0.9667
MSTRG.474537	gene18164	-0.9833
MSTRG.474537	gene18190	-0.9667
MSTRG.474537	gene18871	-0.9833
MSTRG.474537	gene20422	0.9833
MSTRG.474537	gene217	-0.9833
MSTRG.474537	gene21724	0.9833
MSTRG.474537	gene21851	-0.9667
MSTRG.474537	gene22751	-0.9667
MSTRG.474537	gene23025	0.9833
MSTRG.474537	gene23671	0.9667
MSTRG.474537	gene24976	-0.95
MSTRG.474537	gene25007	-0.95
MSTRG.474537	gene25128	-0.9667
MSTRG.474537	gene25202	0.95
MSTRG.474537	gene26544	-0.95
MSTRG.474537	gene26986	0.95
MSTRG.474537	gene27012	0.95
MSTRG.474537	gene27099	0.95
MSTRG.474537	gene28157	-0.95
MSTRG.474537	gene3434	0.95
MSTRG.474537	gene3446	0.95
MSTRG.474537	gene3843	-0.95
MSTRG.474537	gene4037	0.9667
MSTRG.474537	gene4164	-0.9667
MSTRG.474537	gene4279	0.95
MSTRG.474537	gene4604	0.95
MSTRG.474537	gene5772	-0.95
MSTRG.474537	gene5802	0.95
MSTRG.474537	gene6917	0.95
MSTRG.474537	gene8031	0.95
MSTRG.474537	gene8142	-0.95
MSTRG.474537	gene848	-0.95
MSTRG.474537	gene8701	-0.95
MSTRG.474537	gene9880	-0.9667
MSTRG.475702	gene12060	0.954
MSTRG.475702	gene12422	0.9624
MSTRG.475702	gene16393	0.9624
MSTRG.475702	gene16884	0.9624
MSTRG.475702	gene17390	0.9791
MSTRG.475702	gene19091	0.9624
MSTRG.475702	gene24634	0.954
MSTRG.475702	gene26593	-0.9791
MSTRG.475702	gene27916	0.9791
MSTRG.475702	gene3460	0.9624
MSTRG.475702	gene6403	0.9624
MSTRG.475702	gene8083	0.9624
MSTRG.486437	gene10185	0.9662
MSTRG.486437	gene10725	-0.9662
MSTRG.486437	gene10871	-0.9662
MSTRG.486437	gene11142	-0.9832
MSTRG.486437	gene11190	-0.9662
MSTRG.486437	gene11877	-0.9662
MSTRG.486437	gene11899	-0.9832
MSTRG.486437	gene12006	-0.9662
MSTRG.486437	gene12816	-0.9662
MSTRG.486437	gene13230	0.9662
MSTRG.486437	gene13458	-0.9662
MSTRG.486437	gene13953	-0.9662
MSTRG.486437	gene15156	-0.9662
MSTRG.486437	gene15367	0.9662
MSTRG.486437	gene1601	-0.9662
MSTRG.486437	gene16197	-0.9662
MSTRG.486437	gene16201	0.9662
MSTRG.486437	gene16747	-0.9662
MSTRG.486437	gene17039	-0.9662
MSTRG.486437	gene17964	-0.9662
MSTRG.486437	gene18102	-0.9832
MSTRG.486437	gene18109	-0.9662
MSTRG.486437	gene18868	-0.9662
MSTRG.486437	gene19726	-0.9832
MSTRG.486437	gene21507	-0.9662
MSTRG.486437	gene22757	-0.9662
MSTRG.486437	gene2296	-0.9832
MSTRG.486437	gene23804	-0.9832
MSTRG.486437	gene2441	-0.9662
MSTRG.486437	gene24840	0.9662
MSTRG.486437	gene25007	-0.9662
MSTRG.486437	gene2502	-0.9832
MSTRG.486437	gene25125	-0.9662
MSTRG.486437	gene25202	0.9662
MSTRG.486437	gene2521	0.9662
MSTRG.486437	gene25256	-0.9662
MSTRG.486437	gene25269	-0.9662
MSTRG.486437	gene25289	-0.9662
MSTRG.486437	gene25569	-0.9662
MSTRG.486437	gene26058	-0.9662
MSTRG.486437	gene26373	-0.9662
MSTRG.486437	gene26880	-0.9662
MSTRG.486437	gene26986	0.9662
MSTRG.486437	gene27552	-0.9662
MSTRG.486437	gene2774	-0.9662
MSTRG.486437	gene28157	-0.9662
MSTRG.486437	gene28377	-0.9662
MSTRG.486437	gene3082	0.9832
MSTRG.486437	gene3195	-0.9662
MSTRG.486437	gene3459	0.9662
MSTRG.486437	gene3842	-0.9832
MSTRG.486437	gene475	-0.9662
MSTRG.486437	gene5853	-0.9662
MSTRG.486437	gene6946	0.9832
MSTRG.486437	gene7547	-0.9662
MSTRG.486437	gene756	-0.9662
MSTRG.486437	gene7936	-0.9662
MSTRG.486437	gene8107	-0.9662
MSTRG.486437	gene8198	0.9662
MSTRG.486437	gene8303	-0.9662
MSTRG.486437	gene8395	-0.9662
MSTRG.48889	gene12343	0.9574
MSTRG.48889	gene21696	-0.9574
MSTRG.48889	gene26265	-0.9574
MSTRG.495055	gene12701	-0.9574
MSTRG.496966	gene1031	-0.9662
MSTRG.496966	gene1038	-0.9662
MSTRG.496966	gene10698	-0.9662
MSTRG.496966	gene11142	-0.9662
MSTRG.496966	gene11145	-0.9662
MSTRG.496966	gene11623	-0.9662
MSTRG.496966	gene11899	-0.9662
MSTRG.496966	gene12033	-0.9662
MSTRG.496966	gene12757	-0.9662
MSTRG.496966	gene12887	-0.9662
MSTRG.496966	gene12935	-0.9662
MSTRG.496966	gene13230	0.9832
MSTRG.496966	gene13286	-0.9662
MSTRG.496966	gene13544	-0.9662
MSTRG.496966	gene13726	-0.9662
MSTRG.496966	gene1601	-0.9832
MSTRG.496966	gene16395	-0.9662
MSTRG.496966	gene16513	-0.9662
MSTRG.496966	gene17039	-0.9832
MSTRG.496966	gene17227	-0.9662
MSTRG.496966	gene1739	-0.9662
MSTRG.496966	gene18102	-0.9662
MSTRG.496966	gene18868	-0.9832
MSTRG.496966	gene19201	-0.9662
MSTRG.496966	gene19726	-0.9662
MSTRG.496966	gene2099	-0.9662
MSTRG.496966	gene21336	-0.9662
MSTRG.496966	gene21507	-0.9832
MSTRG.496966	gene22079	-0.9662
MSTRG.496966	gene2296	-0.9662
MSTRG.496966	gene23804	-0.9662
MSTRG.496966	gene24840	0.9832
MSTRG.496966	gene24886	-0.9662
MSTRG.496966	gene2502	-0.9662
MSTRG.496966	gene25125	-0.9832
MSTRG.496966	gene25158	-0.9662
MSTRG.496966	gene25289	-0.9832
MSTRG.496966	gene25384	-0.9662
MSTRG.496966	gene26058	-0.9832
MSTRG.496966	gene26373	-0.9832
MSTRG.496966	gene26652	-0.9662
MSTRG.496966	gene26792	-0.9662
MSTRG.496966	gene27552	-0.9832
MSTRG.496966	gene28074	-0.9662
MSTRG.496966	gene3082	0.9662
MSTRG.496966	gene3569	-0.9662
MSTRG.496966	gene3842	-0.9662
MSTRG.496966	gene3968	-0.9662
[truncated: 1,262 more rows]

## Sheet: E120d-E90d
Prediction results of cis target of differentially expressed lncRNA in E120d-E90d
Lnc_id	Gene_id	Distance
MSTRG.664550	gene26438	3147
MSTRG.146552	gene4989	38926
MSTRG.254755	gene9453	9805
MSTRG.191433	gene6743	3198
MSTRG.191433	gene6741	14703
MSTRG.191433	gene6740	15449
MSTRG.191433	gene6746	47389
MSTRG.191433	gene6745	38286
MSTRG.191433	gene6744	14898
MSTRG.191433	gene6738	49557
MSTRG.191433	gene6739	31093
MSTRG.502249	gene19188	39632
MSTRG.502249	gene19189	1514
MSTRG.70758	gene2551	215
gene12672	gene12670	33442
MSTRG.371421	gene13280	2794
MSTRG.371421	gene13279	299
gene26380	gene26381	49096
gene26380	gene26379	23986
MSTRG.719074	gene28209	27488
MSTRG.520182	gene20287	512
MSTRG.173186	gene6051	580
MSTRG.419658	gene14892	33862
gene22170	gene22171	541
MSTRG.393515	gene13804	12
MSTRG.135698	gene4441	11971
MSTRG.570602	gene21892	237
MSTRG.159547	gene5591	30637
MSTRG.35406	gene1705	18294
MSTRG.256654	gene9577	20379
gene1242	gene1243	7547
gene1242	gene1241	13951
gene1242	gene1244	23349
MSTRG.411762	gene14298	4392
MSTRG.411762	gene14297	43112
MSTRG.223165	gene7951	34214
MSTRG.308950	gene11145	14894
MSTRG.308950	gene11143	41199
MSTRG.308950	gene11144	591
MSTRG.570854	gene21898	30865
MSTRG.570854	gene21900	18784
MSTRG.535466	gene20592	1328
MSTRG.186393	gene6568	17890
MSTRG.125269	gene4159	30267
MSTRG.125269	gene4161	45614
MSTRG.246325	gene8868	2632
MSTRG.246323	gene8868	20415
MSTRG.246323	gene8867	8170
MSTRG.263752	gene10019	9158
MSTRG.263752	gene10018	47573
MSTRG.263752	gene10020	787
MSTRG.313133	gene11289	24813
MSTRG.313133	gene11287	311
MSTRG.313133	gene11290	43694
MSTRG.76264	gene2770	45837
MSTRG.411827	gene14299	22875
gene20673	gene20672	1010
gene20673	gene20671	49566
MSTRG.501378	gene19188	5686
MSTRG.501378	gene19189	34419
MSTRG.649627	gene25473	27065
MSTRG.649627	gene25471	25004
MSTRG.649627	gene25472	466
MSTRG.610044	gene23872	41706
MSTRG.610044	gene23874	20622
MSTRG.610044	gene23876	18633
MSTRG.610044	gene23873	26779
MSTRG.504986	gene19329	2842
MSTRG.713665	gene28030	4114
MSTRG.650617	gene25565	9984
MSTRG.650617	gene25563	21700
MSTRG.650617	gene25562	25230
MSTRG.650617	gene25569	27897
MSTRG.650617	gene25567	1740
MSTRG.650617	gene25561	29399
MSTRG.650617	gene25564	16382
MSTRG.650617	gene25568	13907
MSTRG.653547	gene25785	29769
MSTRG.291248	gene10582	107
MSTRG.205743	gene7503	10947
MSTRG.205743	gene7502	6009
MSTRG.205743	gene7501	13395
MSTRG.39542	gene1701	14958
gene8030	gene8029	31089
MSTRG.35463	gene1706	13287
MSTRG.35589	gene1707	47823
MSTRG.596749	gene23029	6603
MSTRG.614087	gene24103	47883
MSTRG.59898	gene2299	11728
MSTRG.59898	gene2298	269
MSTRG.222885	gene7936	8694
gene17757	gene17755	43959
gene17757	gene17756	13311
MSTRG.593715	gene22884	21986
gene3530	gene3529	25910
MSTRG.100905	gene3543	6697
gene9748	gene9749	43493
gene9748	gene9746	30762
gene9748	gene9747	16714
gene9748	gene9745	44674
MSTRG.421324	gene15078	41892
MSTRG.421324	gene15076	11279
MSTRG.421324	gene15077	28958
MSTRG.421324	gene15070	40299
MSTRG.421324	gene15071	22609
MSTRG.421324	gene15072	2509
MSTRG.28343	gene1135	41012
MSTRG.28343	gene1134	40424
MSTRG.28343	gene1131	16512
MSTRG.28343	gene1130	4769
MSTRG.28343	gene1133	37871
MSTRG.28343	gene1132	18468
MSTRG.28343	gene1126	14181
MSTRG.28343	gene1127	12710
MSTRG.28343	gene1125	39057
MSTRG.28343	gene1129	4036
MSTRG.681710	gene26986	35749
MSTRG.681710	gene26987	45832
MSTRG.382711	gene13509	2195
MSTRG.382711	gene13510	28302
MSTRG.100219	gene3541	2756
MSTRG.669753	gene26555	677
MSTRG.82877	gene2962	29428
MSTRG.53714	gene2127	23216
MSTRG.53714	gene2128	39998
MSTRG.542711	gene20750	39519
MSTRG.475531	gene17572	1093
gene21918	gene21923	26724
gene21918	gene21922	5299
gene21918	gene21938	42956
gene21918	gene21932	31661
gene21918	gene21933	34551
gene21918	gene21930	30649
gene21918	gene21935	36878
gene21918	gene21936	38314
gene21918	gene21927	29833
gene21918	gene21916	2229
gene21918	gene21917	1129
gene21918	gene21943	44442
gene21918	gene21942	44074
gene21918	gene21940	43692
gene21918	gene21913	7397
gene21918	gene21931	31346
gene21918	gene21937	40277
gene21918	gene21924	27988
MSTRG.722949	gene28354	38631
MSTRG.722949	gene28352	37026
MSTRG.722949	gene28353	398
gene698	gene700	21336
gene698	gene697	28252
MSTRG.438521	gene15953	36371
MSTRG.438521	gene15955	7504
MSTRG.399091	gene13962	1048
MSTRG.399091	gene13963	480
MSTRG.310493	gene11188	33594
MSTRG.310493	gene11190	27303
MSTRG.662675	gene26345	32242
MSTRG.662675	gene26344	5342
MSTRG.662675	gene26346	43272
MSTRG.439165	gene15978	1000
MSTRG.439165	gene15977	4259
MSTRG.439165	gene15976	23976
MSTRG.439165	gene15980	18713
MSTRG.443811	gene16235	39808
MSTRG.443811	gene16234	49879
MSTRG.443811	gene16236	2645
MSTRG.595233	gene22973	37327
MSTRG.595233	gene22972	3620
MSTRG.595233	gene22971	7979
MSTRG.595233	gene22970	12128
MSTRG.595233	gene22969	24869
MSTRG.439752	gene16008	16459
gene10279	gene10280	22380
MSTRG.551690	gene21179	39541
MSTRG.551690	gene21180	47718
MSTRG.551690	gene21178	13938
MSTRG.551690	gene21176	6546
MSTRG.551690	gene21177	847
MSTRG.551690	gene21174	46609
MSTRG.551690	gene21175	18950
gene9397	gene9399	27444
gene9397	gene9398	3209
MSTRG.390182	gene13707	264
MSTRG.598432	gene23200	42966
MSTRG.598432	gene23199	39391
MSTRG.598432	gene23198	23373
MSTRG.598432	gene23196	5286
MSTRG.598432	gene23197	16317
MSTRG.598432	gene23195	3459
MSTRG.136259	gene4458	41495
MSTRG.642103	gene25239	31438
MSTRG.572939	gene22033	25957
MSTRG.572939	gene22034	35132
MSTRG.572939	gene22035	36321
MSTRG.572939	gene22032	1648
MSTRG.572939	gene22030	40544
MSTRG.572939	gene22031	20813
MSTRG.405191	gene14082	13890
MSTRG.405191	gene14084	47592
MSTRG.153038	gene5344	1134
MSTRG.249373	gene9268	26533
MSTRG.481169	gene17806	14308
MSTRG.394936	gene13879	30287
MSTRG.486868	gene18072	44203
MSTRG.486868	gene18071	25536
MSTRG.486868	gene18063	11962
MSTRG.486868	gene18062	13467
MSTRG.486868	gene18064	8045
MSTRG.486868	gene18065	6587
MSTRG.486868	gene18066	78
MSTRG.486868	gene18068	4748
MSTRG.486868	gene18069	6153
MSTRG.486868	gene18061	35007
MSTRG.139847	gene4578	23180
MSTRG.276918	gene10276	6975
gene12929	gene12928	1966
gene12929	gene12930	21552
MSTRG.399589	gene13978	21461
MSTRG.399589	gene13977	4420
MSTRG.276913	gene10278	11730
MSTRG.276913	gene10277	11226
MSTRG.30700	gene1410	8094
MSTRG.643596	gene25289	25030
MSTRG.685588	gene27116	48927
MSTRG.101210	gene3551	4337
MSTRG.273111	gene10216	18078
MSTRG.273111	gene10215	10559
gene24735	gene24737	24004
gene18015	gene18014	7
gene18015	gene18012	43020
MSTRG.249151	gene9250	26164
MSTRG.123416	gene4154	26358
MSTRG.584720	gene22388	24173
MSTRG.577084	gene22205	2254
MSTRG.84716	gene3053	11467
MSTRG.84716	gene3051	48413
MSTRG.84716	gene3052	15186
MSTRG.571405	gene21914	48957
MSTRG.571405	gene21913	45685
MSTRG.447490	gene16362	31646
MSTRG.447490	gene16361	46979
MSTRG.617505	gene24362	26466
MSTRG.562573	gene21620	43267
MSTRG.552486	gene21200	26904
MSTRG.552486	gene21203	19908
MSTRG.525687	gene20426	28318
MSTRG.35075	gene1687	17170
MSTRG.35075	gene1686	42901
MSTRG.35075	gene1689	31600
MSTRG.35075	gene1688	28174
MSTRG.618111	gene24432	13366
MSTRG.618111	gene24433	18156
MSTRG.151965	gene5313	15386
MSTRG.502246	gene19188	30278
MSTRG.502246	gene19189	14147
MSTRG.217466	gene7849	6885
MSTRG.355880	gene12779	6379
MSTRG.355880	gene12780	29870
MSTRG.32236	gene1575	30034
MSTRG.32236	gene1574	19660
MSTRG.32236	gene1569	26982
MSTRG.370473	gene13257	45271
MSTRG.29463	gene1247	8211
MSTRG.29463	gene1249	11250
MSTRG.182247	gene6323	3024
MSTRG.182247	gene6322	2093
MSTRG.182247	gene6324	13265
MSTRG.182247	gene6318	32080
MSTRG.182247	gene6316	46533
MSTRG.356895	gene12813	48744
MSTRG.78883	gene2853	27456
MSTRG.300500	gene10871	27903
MSTRG.300500	gene10870	43778
MSTRG.300500	gene10872	48946
MSTRG.132736	gene4350	32673
MSTRG.252032	gene9414	11056
MSTRG.252032	gene9415	44345
MSTRG.252032	gene9413	7592
MSTRG.670758	gene26628	46037
MSTRG.501383	gene19188	1248
MSTRG.501383	gene19189	46945
MSTRG.43893	gene1783	169
MSTRG.670816	gene26629	12679
MSTRG.670816	gene26628	338
MSTRG.649071	gene25457	21706
MSTRG.663728	gene26379	13442
MSTRG.663728	gene26378	46143
MSTRG.17509	gene670	18163
MSTRG.344157	gene12497	47633
MSTRG.674621	gene26782	46326
MSTRG.674621	gene26781	30908
MSTRG.171181	gene5944	3399
MSTRG.171181	gene5943	200
MSTRG.663694	gene26373	16159
MSTRG.537739	gene20659	1113
MSTRG.571817	gene21923	22840
MSTRG.571817	gene21922	1415
MSTRG.571817	gene21938	39072
MSTRG.571817	gene21932	27777
MSTRG.571817	gene21933	30667
MSTRG.571817	gene21930	26765
MSTRG.571817	gene21935	32994
MSTRG.571817	gene21936	34430
MSTRG.571817	gene21927	25949
MSTRG.571817	gene21943	40558
MSTRG.571817	gene21942	40190
MSTRG.571817	gene21940	39808
MSTRG.571817	gene21949	47070
MSTRG.571817	gene21931	27462
MSTRG.571817	gene21937	36393
MSTRG.571817	gene21924	24104
MSTRG.571817	gene21950	47974
MSTRG.344412	gene12508	35842
MSTRG.136597	gene4491	25744
MSTRG.136597	gene4492	5998
MSTRG.295822	gene10700	11729
MSTRG.225005	gene8014	2154
MSTRG.7071	gene389	5989
MSTRG.7071	gene390	15746
MSTRG.7071	gene391	42709
MSTRG.341858	gene12444	4617
MSTRG.44954	gene1873	37737
MSTRG.44954	gene1874	11258
MSTRG.44954	gene1876	21746
gene1246	gene1247	21539
gene1246	gene1245	21447
gene1246	gene1248	49337
MSTRG.573875	gene22086	1071
MSTRG.194569	gene6968	25485
MSTRG.714796	gene28069	42328
MSTRG.714796	gene28068	27736
MSTRG.714796	gene28067	1190
MSTRG.714796	gene28066	16505
MSTRG.146824	gene5003	46276
MSTRG.228139	gene8094	3638
MSTRG.228139	gene8093	1318
gene3211	gene3210	22014
MSTRG.18147	gene705	38
MSTRG.18147	gene706	16308
MSTRG.123457	gene4154	171
gene11191	gene11188	38049
gene11191	gene11190	31758
MSTRG.655280	gene25847	18606
MSTRG.300486	gene10870	28633
MSTRG.152489	gene5323	2095
MSTRG.683406	gene27023	49975
MSTRG.683406	gene27024	40811
MSTRG.683406	gene27026	9488
MSTRG.683406	gene27025	573
MSTRG.63734	gene2404	25081
MSTRG.63734	gene2405	40637
gene28604	gene28605	2429
MSTRG.450850	gene16489	11600
MSTRG.450850	gene16488	42396
MSTRG.146511	gene4989	10280
MSTRG.146511	gene4988	18160
MSTRG.107746	gene3754	44472
MSTRG.700949	gene27489	12708
gene23049	gene23048	49516
MSTRG.53702	gene2127	16178
MSTRG.53702	gene2128	32960
MSTRG.421196	gene15063	40680
MSTRG.421196	gene15066	1121
MSTRG.421196	gene15064	33657
MSTRG.421196	gene15068	31443
MSTRG.421196	gene15067	23814
MSTRG.421196	gene15065	19622
MSTRG.341702	gene12436	38295
MSTRG.421193	gene15063	36490
MSTRG.421193	gene15062	46355
MSTRG.421193	gene15066	301
MSTRG.421193	gene15064	29467
MSTRG.421193	gene15068	35518
MSTRG.421193	gene15067	27889
MSTRG.421193	gene15065	15432
MSTRG.76367	gene2775	29472
gene11973	gene11974	28558
MSTRG.580289	gene22292	91
MSTRG.580289	gene22291	18128
MSTRG.310482	gene11188	11020
MSTRG.310482	gene11190	4729
gene27196	gene27197	3
MSTRG.229516	gene8126	47397
MSTRG.249115	gene9243	26085
MSTRG.249115	gene9241	31964
MSTRG.249115	gene9247	37904
MSTRG.249115	gene9246	2599
MSTRG.249115	gene9245	16885
MSTRG.649604	gene25471	20458
MSTRG.649604	gene25470	42794
MSTRG.649604	gene25469	13421
MSTRG.421824	gene15148	20596
MSTRG.421824	gene15149	11643
MSTRG.421824	gene15152	8463
MSTRG.421824	gene15153	11377
MSTRG.421824	gene15151	3876
MSTRG.421824	gene15150	2586
MSTRG.421824	gene15156	46772
MSTRG.421824	gene15155	27505
MSTRG.421824	gene15154	22019
MSTRG.93350	gene3364	25051
MSTRG.93350	gene3363	23450
MSTRG.181944	gene6291	37302
MSTRG.225405	gene8028	21085
MSTRG.225405	gene8029	3390
MSTRG.96383	gene3425	2133
gene6256	gene6255	20344
MSTRG.474533	gene17536	1414
MSTRG.35327	gene1703	16027
MSTRG.474537	gene17536	9831
MSTRG.474537	gene17537	41956
MSTRG.263632	gene10019	14171
MSTRG.263632	gene10018	11802
MSTRG.263632	gene10017	1360
MSTRG.437735	gene15922	1019
MSTRG.437735	gene15923	9110
MSTRG.585170	gene22400	28491
MSTRG.585170	gene22398	831
MSTRG.585170	gene22401	43886
MSTRG.585170	gene22399	10912
MSTRG.443071	gene16217	1968
MSTRG.443071	gene16216	18181
MSTRG.230179	gene8157	13833
MSTRG.632781	gene25001	21216
MSTRG.632781	gene25000	13555
gene3415	gene3414	9706
MSTRG.182592	gene6381	39093
MSTRG.182592	gene6380	10768
MSTRG.182592	gene6376	42384
MSTRG.182592	gene6377	23727
MSTRG.182592	gene6378	18
MSTRG.182592	gene6379	3428
MSTRG.496966	gene19008	17133
MSTRG.496966	gene19007	310
MSTRG.617489	gene24362	11089
MSTRG.535533	gene20592	48793
MSTRG.617526	gene24363	44250
MSTRG.397674	gene13941	20218
MSTRG.269599	gene10147	7351
MSTRG.30837	gene1420	22561
MSTRG.30837	gene1418	13790
MSTRG.315202	id254291	10022
MSTRG.315202	gene11428	46972
gene23185	gene23190	49367
gene23185	gene23187	7436
gene23185	gene23183	39208
gene23185	gene23182	43625
MSTRG.118784	gene4052	479
gene18013	gene18014	1320
gene18013	gene18012	36536
MSTRG.505300	gene19374	1872
MSTRG.498198	gene19057	31158
MSTRG.498198	gene19058	7978
MSTRG.474387	gene17525	26913
MSTRG.325000	gene11905	18674
MSTRG.96362	gene3423	35538
MSTRG.412412	gene14356	45510
MSTRG.412412	gene14355	424
MSTRG.629877	gene24892	38653
MSTRG.629877	gene24893	12984
MSTRG.629877	gene24895	35205
MSTRG.421537	gene15066	33360
MSTRG.421537	gene15064	1816
MSTRG.421537	gene15065	16105
MSTRG.421537	gene15049	45908
MSTRG.421537	gene15052	699
MSTRG.421537	gene15050	39284
MSTRG.421537	gene15051	26332
gene22020	gene22018	45651
gene22020	gene22019	3922
MSTRG.681596	gene26984	15845
MSTRG.68360	gene2500	45288
MSTRG.486437	gene18011	15095
MSTRG.486437	gene18010	15668
MSTRG.486437	gene18009	22234
MSTRG.322705	gene11853	22903
MSTRG.322705	gene11854	4624
Prediction results of trans target of differentially expressed lncRNA in E120d-E90d
LncRNA	Gene_id	Correlation
MSTRG.100905	gene10489	0.9833
MSTRG.100905	gene10645	0.95
MSTRG.100905	gene10905	0.9667
MSTRG.100905	gene11364	0.95
MSTRG.100905	gene12007	0.9667
MSTRG.100905	gene12659	1
MSTRG.100905	gene12754	0.95
MSTRG.100905	gene13129	0.9667
MSTRG.100905	gene13995	0.9667
MSTRG.100905	gene141	0.9833
MSTRG.100905	gene143	0.95
MSTRG.100905	gene14682	0.9667
MSTRG.100905	gene14756	0.95
MSTRG.100905	gene14969	0.9667
MSTRG.100905	gene15772	0.95
MSTRG.100905	gene1610	0.95
MSTRG.100905	gene16188	-0.9833
MSTRG.100905	gene16569	0.9667
MSTRG.100905	gene16811	0.95
MSTRG.100905	gene19362	0.95
MSTRG.100905	gene19624	0.9667
MSTRG.100905	gene20404	0.9833
MSTRG.100905	gene20962	1
MSTRG.100905	gene21796	0.95
MSTRG.100905	gene22347	0.9833
MSTRG.100905	gene22972	0.9833
MSTRG.100905	gene2532	0.9667
MSTRG.100905	gene25348	0.9833
MSTRG.100905	gene2583	0.95
MSTRG.100905	gene26685	0.9833
MSTRG.100905	gene268	0.9667
MSTRG.100905	gene27009	-0.95
MSTRG.100905	gene27059	0.95
MSTRG.100905	gene2760	0.9667
MSTRG.100905	gene27670	0.95
MSTRG.100905	gene2852	0.95
MSTRG.100905	gene3750	0.9667
MSTRG.100905	gene3921	0.95
MSTRG.100905	gene4154	0.9667
MSTRG.100905	gene4181	0.95
MSTRG.100905	gene4291	0.95
MSTRG.100905	gene435	0.9833
MSTRG.100905	gene5194	-0.95
MSTRG.100905	gene534	0.95
MSTRG.100905	gene5722	0.9667
MSTRG.100905	gene5891	-0.95
MSTRG.100905	gene67	-0.9667
MSTRG.100905	gene7001	0.95
MSTRG.100905	gene7159	0.9833
MSTRG.100905	gene8153	0.95
MSTRG.100905	gene875	-0.9667
MSTRG.101037	gene10051	0.9662
MSTRG.101037	gene10385	0.9662
MSTRG.101037	gene11974	0.9662
MSTRG.101037	gene1225	-0.9662
MSTRG.101037	gene13892	0.9832
MSTRG.101037	gene14369	0.9662
MSTRG.101037	gene15274	-0.9662
MSTRG.101037	gene17067	0.9662
MSTRG.101037	gene17129	0.9662
MSTRG.101037	gene19020	0.9662
MSTRG.101037	gene20642	0.9832
MSTRG.101037	gene26536	0.9662
MSTRG.101037	gene28176	0.9832
MSTRG.101037	gene28235	0.9662
MSTRG.101037	gene695	0.9662
MSTRG.101037	gene9752	0.9832
MSTRG.101210	gene11211	0.95
MSTRG.101210	gene13754	0.95
MSTRG.101210	gene19372	-0.95
MSTRG.101210	gene20894	0.9833
MSTRG.101210	gene21822	0.95
MSTRG.101210	gene27313	1
MSTRG.101210	gene27515	0.9667
MSTRG.101210	gene28179	0.9833
MSTRG.101210	gene3816	0.95
MSTRG.101210	gene3869	0.95
MSTRG.101210	gene3966	0.9667
MSTRG.101210	gene4418	0.95
MSTRG.101210	gene5425	0.95
MSTRG.107746	gene10408	0.9624
MSTRG.107746	gene1141	0.954
MSTRG.107746	gene13343	0.9624
MSTRG.107746	gene13866	0.9624
MSTRG.107746	gene3124	0.9791
MSTRG.107746	gene3845	0.9624
MSTRG.107746	gene9398	0.9791
MSTRG.123416	gene1038	0.95
MSTRG.123416	gene10385	0.95
MSTRG.123416	gene10464	0.9667
MSTRG.123416	gene10684	0.95
MSTRG.123416	gene10698	0.9667
MSTRG.123416	gene10817	0.95
MSTRG.123416	gene11184	0.9667
MSTRG.123416	gene11764	0.9667
MSTRG.123416	gene1195	0.9667
MSTRG.123416	gene12454	0.9833
MSTRG.123416	gene12554	0.95
MSTRG.123416	gene12764	0.95
MSTRG.123416	gene12887	0.95
MSTRG.123416	gene13286	0.9667
MSTRG.123416	gene13475	0.95
MSTRG.123416	gene13544	0.95
MSTRG.123416	gene13670	0.95
MSTRG.123416	gene13726	0.9667
MSTRG.123416	gene13728	1
MSTRG.123416	gene13892	0.9833
MSTRG.123416	gene14369	0.9667
MSTRG.123416	gene14746	0.9667
MSTRG.123416	gene15872	0.95
MSTRG.123416	gene1598	0.9667
MSTRG.123416	gene16561	0.9833
MSTRG.123416	gene17047	0.9833
MSTRG.123416	gene17067	0.9667
MSTRG.123416	gene17129	0.95
MSTRG.123416	gene17139	0.95
MSTRG.123416	gene1739	0.9667
MSTRG.123416	gene17808	0.9667
MSTRG.123416	gene17884	0.9833
MSTRG.123416	gene17936	0.95
MSTRG.123416	gene1822	-0.9833
MSTRG.123416	gene19201	0.95
MSTRG.123416	gene19641	0.95
MSTRG.123416	gene19761	0.9833
MSTRG.123416	gene20269	0.9667
MSTRG.123416	gene20394	0.9833
MSTRG.123416	gene20642	0.95
MSTRG.123416	gene20670	0.9667
MSTRG.123416	gene21600	0.95
MSTRG.123416	gene2196	-0.95
MSTRG.123416	gene22577	0.95
MSTRG.123416	gene2260	0.9667
MSTRG.123416	gene22821	0.9667
MSTRG.123416	gene2295	0.9833
MSTRG.123416	gene23107	0.9833
MSTRG.123416	gene23896	0.9833
MSTRG.123416	gene2393	0.95
MSTRG.123416	gene24095	0.95
MSTRG.123416	gene24105	0.9667
MSTRG.123416	gene24635	0.9667
MSTRG.123416	gene24886	0.95
MSTRG.123416	gene25174	0.9667
MSTRG.123416	gene25290	0.9833
MSTRG.123416	gene25384	0.95
MSTRG.123416	gene27227	0.9667
MSTRG.123416	gene27269	0.95
MSTRG.123416	gene27283	0.95
MSTRG.123416	gene27522	0.9667
MSTRG.123416	gene27553	0.9667
MSTRG.123416	gene2769	0.95
MSTRG.123416	gene27707	0.95
MSTRG.123416	gene27929	0.9667
MSTRG.123416	gene27951	0.9667
MSTRG.123416	gene28176	0.9833
MSTRG.123416	gene28264	0.95
MSTRG.123416	gene2944	0.9667
MSTRG.123416	gene3115	0.9833
MSTRG.123416	gene3124	0.95
MSTRG.123416	gene3160	0.95
MSTRG.123416	gene3401	0.95
MSTRG.123416	gene3485	0.95
MSTRG.123416	gene3569	0.95
MSTRG.123416	gene3901	0.95
MSTRG.123416	gene3926	0.9667
MSTRG.123416	gene3968	0.9667
MSTRG.123416	gene4139	0.9667
MSTRG.123416	gene4366	0.9667
MSTRG.123416	gene4781	0.9833
MSTRG.123416	gene5184	0.95
MSTRG.123416	gene5466	0.9667
MSTRG.123416	gene549	0.95
MSTRG.123416	gene5878	0.9667
MSTRG.123416	gene5923	0.9667
MSTRG.123416	gene6131	0.95
MSTRG.123416	gene6187	0.9667
MSTRG.123416	gene701	0.9667
MSTRG.123416	gene7229	0.9667
MSTRG.123416	gene7724	0.9833
MSTRG.123416	gene776	-0.95
MSTRG.123416	gene789	0.95
MSTRG.123416	gene7932	-0.9833
MSTRG.123416	gene9402	-0.95
MSTRG.123416	gene9437	0.95
MSTRG.123416	gene9752	0.9833
MSTRG.123457	gene11739	0.95
MSTRG.123457	gene16575	0.9667
MSTRG.125269	gene12021	-0.95
MSTRG.125269	gene26487	-0.95
MSTRG.125269	gene28613	-0.9833
MSTRG.136182	gene10565	-0.954
MSTRG.136182	gene11974	-0.954
MSTRG.136182	gene14784	-0.9624
MSTRG.136182	gene16355	-0.9791
MSTRG.136182	gene16419	0.9791
MSTRG.136182	gene22172	-0.9624
MSTRG.136182	gene26536	-0.954
MSTRG.136252	gene110	-0.95
MSTRG.136252	gene11784	-0.95
MSTRG.136252	gene12187	-0.9667
MSTRG.136252	gene12194	-0.95
MSTRG.136252	gene12202	-0.95
MSTRG.136252	gene1232	0.9833
MSTRG.136252	gene13210	-0.9667
MSTRG.136252	gene13280	0.9833
MSTRG.136252	gene13340	-0.95
MSTRG.136252	gene13404	-0.95
MSTRG.136252	gene13445	0.9833
MSTRG.136252	gene13591	0.9833
MSTRG.136252	gene13906	-0.95
MSTRG.136252	gene13977	1
MSTRG.136252	gene14158	-0.9667
MSTRG.136252	gene14213	-1
MSTRG.136252	gene14472	-0.9833
MSTRG.136252	gene14952	-0.9833
MSTRG.136252	gene14985	-0.95
MSTRG.136252	gene1513	-0.9833
MSTRG.136252	gene154	-0.95
MSTRG.136252	gene15413	-0.9833
MSTRG.136252	gene15709	-0.9667
MSTRG.136252	gene15799	0.9667
MSTRG.136252	gene15955	-0.9667
MSTRG.136252	gene16337	-0.95
MSTRG.136252	gene16676	-0.9667
MSTRG.136252	gene17022	-0.9667
MSTRG.136252	gene17095	-0.9833
MSTRG.136252	gene17234	-0.95
MSTRG.136252	gene17288	-0.9833
MSTRG.136252	gene17936	-0.9833
MSTRG.136252	gene1822	0.95
MSTRG.136252	gene19137	-0.9833
MSTRG.136252	gene1959	0.95
MSTRG.136252	gene19761	-0.95
MSTRG.136252	gene20394	-0.95
MSTRG.136252	gene20925	-0.9833
MSTRG.136252	gene21339	-0.9833
MSTRG.136252	gene22224	-0.9833
MSTRG.136252	gene22238	-0.95
MSTRG.136252	gene22383	-0.95
MSTRG.136252	gene2295	-0.95
MSTRG.136252	gene23029	-0.95
MSTRG.136252	gene23107	-0.95
MSTRG.136252	gene23221	-0.95
MSTRG.136252	gene23590	0.95
MSTRG.136252	gene24215	-0.95
MSTRG.136252	gene24996	-0.95
MSTRG.136252	gene25290	-0.95
MSTRG.136252	gene25807	0.95
MSTRG.136252	gene25856	-0.95
MSTRG.136252	gene26075	-0.9833
MSTRG.136252	gene2704	-1
MSTRG.136252	gene27513	-0.95
MSTRG.136252	gene2892	-0.9667
MSTRG.136252	gene3115	-0.95
MSTRG.136252	gene4119	-0.9667
MSTRG.136252	gene4555	-0.95
MSTRG.136252	gene457	-0.95
MSTRG.136252	gene4774	-0.9667
MSTRG.136252	gene4781	-0.95
MSTRG.136252	gene4793	-0.9667
MSTRG.136252	gene4858	-0.9833
MSTRG.136252	gene521	0.95
MSTRG.136252	gene5316	-0.95
MSTRG.136252	gene5418	-0.95
MSTRG.136252	gene562	-0.95
MSTRG.136252	gene595	-0.95
MSTRG.136252	gene634	-0.9667
MSTRG.136252	gene6757	-0.95
MSTRG.136252	gene6967	-0.95
MSTRG.136252	gene7085	0.9667
MSTRG.136252	gene7387	-0.95
MSTRG.136252	gene7724	-0.95
MSTRG.136252	gene775	0.95
MSTRG.136252	gene7765	-0.95
MSTRG.136252	gene783	-1
MSTRG.136252	gene7874	-0.95
MSTRG.136252	gene7932	0.95
MSTRG.136252	gene807	-0.95
MSTRG.136252	gene8105	-0.95
MSTRG.136252	gene8386	-0.95
MSTRG.136252	gene8415	-0.9667
MSTRG.136252	gene8681	-0.9667
MSTRG.136252	gene8825	-0.95
MSTRG.136252	gene9369	-0.9667
MSTRG.139847	gene10633	0.9662
MSTRG.139872	gene10066	0.95
MSTRG.139872	gene10217	0.9833
MSTRG.139872	gene10513	0.9667
MSTRG.139872	gene10517	-0.9667
MSTRG.139872	gene10664	0.9667
MSTRG.139872	gene10823	0.95
MSTRG.139872	gene11662	-0.9833
MSTRG.139872	gene11716	0.95
MSTRG.139872	gene1203	0.9667
MSTRG.139872	gene12056	0.9667
MSTRG.139872	gene12406	-0.95
MSTRG.139872	gene13319	0.95
MSTRG.139872	gene13604	0.9667
MSTRG.139872	gene14298	0.9667
MSTRG.139872	gene14356	0.9667
MSTRG.139872	gene15030	-0.95
MSTRG.139872	gene15041	0.9667
MSTRG.139872	gene15049	0.9667
MSTRG.139872	gene15050	0.9833
MSTRG.139872	gene15051	0.9667
MSTRG.139872	gene15056	0.9667
MSTRG.139872	gene15071	0.9833
MSTRG.139872	gene15081	0.9667
MSTRG.139872	gene15905	0.95
MSTRG.139872	gene16658	0.9667
MSTRG.139872	gene16887	0.95
MSTRG.139872	gene16946	0.9833
MSTRG.139872	gene1707	0.9667
MSTRG.139872	gene1714	0.95
MSTRG.139872	gene18581	0.95
MSTRG.139872	gene19015	-0.9667
MSTRG.139872	gene19261	0.95
MSTRG.139872	gene19708	0.9667
MSTRG.139872	gene20213	0.9833
MSTRG.139872	gene20256	0.9833
MSTRG.139872	gene20585	0.95
MSTRG.139872	gene20904	-0.95
MSTRG.139872	gene21497	-0.95
MSTRG.139872	gene21508	0.9833
MSTRG.139872	gene21579	-0.9833
MSTRG.139872	gene23705	0.9833
MSTRG.139872	gene23763	0.9667
MSTRG.139872	gene23831	0.95
MSTRG.139872	gene24330	0.95
MSTRG.139872	gene24430	0.9667
MSTRG.139872	gene24525	-0.95
MSTRG.139872	gene2457	-0.9667
MSTRG.139872	gene24630	0.95
MSTRG.139872	gene24698	0.95
MSTRG.139872	gene26284	0.95
MSTRG.139872	gene26772	0.9667
MSTRG.139872	gene26876	-0.95
MSTRG.139872	gene27242	0.95
MSTRG.139872	gene27783	-0.9833
MSTRG.139872	gene3045	0.95
MSTRG.139872	gene3071	0.95
MSTRG.139872	gene3073	-0.9667
MSTRG.139872	gene3092	-0.95
MSTRG.139872	gene4004	-0.95
MSTRG.139872	gene4319	0.95
MSTRG.139872	gene4816	0.95
MSTRG.139872	gene572	0.9667
MSTRG.139872	gene5748	-0.9667
MSTRG.139872	gene607	0.95
MSTRG.139872	gene6214	-0.9833
MSTRG.139872	gene6242	0.95
MSTRG.139872	gene6377	0.9667
MSTRG.139872	gene6379	0.9667
MSTRG.139872	gene6380	0.95
MSTRG.139872	gene6521	0.9667
MSTRG.139872	gene6959	0.9667
MSTRG.139872	gene7210	0.9833
MSTRG.139872	gene7255	0.9667
MSTRG.139872	gene982	-0.9667
MSTRG.146511	gene1038	0.9833
MSTRG.146511	gene10464	0.9833
MSTRG.146511	gene1062	0.95
MSTRG.146511	gene10698	0.9833
MSTRG.146511	gene10812	0.95
MSTRG.146511	gene11120	0.95
MSTRG.146511	gene11145	0.95
MSTRG.146511	gene11184	0.95
MSTRG.146511	gene11764	0.9833
MSTRG.146511	gene11784	0.9667
MSTRG.146511	gene11912	0.95
MSTRG.146511	gene1195	0.9833
MSTRG.146511	gene11956	0.95
MSTRG.146511	gene12033	0.9667
MSTRG.146511	gene12187	0.95
MSTRG.146511	gene12202	0.95
MSTRG.146511	gene12454	0.9667
MSTRG.146511	gene12887	0.9833
MSTRG.146511	gene12935	0.95
MSTRG.146511	gene13230	-0.9667
MSTRG.146511	gene13286	0.9833
MSTRG.146511	gene13404	0.95
MSTRG.146511	gene13544	0.9667
MSTRG.146511	gene13726	0.9833
MSTRG.146511	gene13728	0.9833
MSTRG.146511	gene13889	0.95
MSTRG.146511	gene13892	0.95
MSTRG.146511	gene13977	-0.95
MSTRG.146511	gene14158	0.9667
MSTRG.146511	gene14213	0.95
MSTRG.146511	gene14446	0.95
MSTRG.146511	gene14746	0.9833
MSTRG.146511	gene15090	0.9667
MSTRG.146511	gene154	0.95
MSTRG.146511	gene15932	0.95
MSTRG.146511	gene1598	0.9833
MSTRG.146511	gene15990	0.95
MSTRG.146511	gene1601	0.9667
MSTRG.146511	gene16201	-0.95
MSTRG.146511	gene16337	0.95
MSTRG.146511	gene16395	0.95
MSTRG.146511	gene16513	0.9667
MSTRG.146511	gene16561	0.9667
MSTRG.146511	gene16676	0.9667
MSTRG.146511	gene17039	0.95
MSTRG.146511	gene17047	0.9667
MSTRG.146511	gene17139	0.9667
MSTRG.146511	gene1720	0.95
MSTRG.146511	gene17234	0.9667
MSTRG.146511	gene1739	0.9833
MSTRG.146511	gene17808	0.9833
MSTRG.146511	gene17884	0.9667
MSTRG.146511	gene17936	0.9833
MSTRG.146511	gene17980	0.95
MSTRG.146511	gene1822	-1
MSTRG.146511	gene18868	0.9667
MSTRG.146511	gene19201	0.9667
MSTRG.146511	gene1959	-0.95
MSTRG.146511	gene19641	0.9667
MSTRG.146511	gene19761	1
MSTRG.146511	gene19762	0.95
MSTRG.146511	gene2015	0.95
MSTRG.146511	gene20269	0.95
MSTRG.146511	gene20394	1
MSTRG.146511	gene21439	0.95
MSTRG.146511	gene21507	0.9667
MSTRG.146511	gene21664	0.95
MSTRG.146511	gene22079	0.9667
MSTRG.146511	gene22125	0.9667
MSTRG.146511	gene22383	0.95
MSTRG.146511	gene22577	0.9667
MSTRG.146511	gene2260	0.9833
MSTRG.146511	gene22821	0.9833
MSTRG.146511	gene2295	1
MSTRG.146511	gene23107	1
MSTRG.146511	gene23368	0.95
MSTRG.146511	gene23625	0.95
MSTRG.146511	gene23896	0.9667
MSTRG.146511	gene24095	0.9667
MSTRG.146511	gene24105	0.9833
MSTRG.146511	gene24635	0.9833
MSTRG.146511	gene24840	-0.9667
MSTRG.146511	gene24886	0.9667
MSTRG.146511	gene25125	0.9667
MSTRG.146511	gene25174	0.9833
MSTRG.146511	gene2521	-0.95
MSTRG.146511	gene25269	0.95
MSTRG.146511	gene25289	0.9667
MSTRG.146511	gene25290	1
MSTRG.146511	gene25384	0.9667
MSTRG.146511	gene25807	-0.9667
MSTRG.146511	gene2605	0.95
MSTRG.146511	gene26058	0.9667
MSTRG.146511	gene26373	0.9667
MSTRG.146511	gene26880	0.95
MSTRG.146511	gene26974	0.95
MSTRG.146511	gene2704	0.95
MSTRG.146511	gene27064	0.95
MSTRG.146511	gene27166	0.95
MSTRG.146511	gene27283	0.9667
MSTRG.146511	gene27502	0.95
MSTRG.146511	gene27513	0.95
MSTRG.146511	gene27522	0.9833
MSTRG.146511	gene27552	0.95
MSTRG.146511	gene27553	0.9833
MSTRG.146511	gene2769	0.9667
MSTRG.146511	gene27707	0.9667
MSTRG.146511	gene27929	0.95
MSTRG.146511	gene27951	0.95
MSTRG.146511	gene28153	0.9667
MSTRG.146511	gene28176	0.95
MSTRG.146511	gene305	0.95
MSTRG.146511	gene3115	1
MSTRG.146511	gene3401	0.9667
MSTRG.146511	gene3569	0.9833
MSTRG.146511	gene3926	0.95
MSTRG.146511	gene3953	0.95
MSTRG.146511	gene3968	0.9833
MSTRG.146511	gene4139	0.9833
MSTRG.146511	gene4232	-0.9667
MSTRG.146511	gene4366	0.9833
MSTRG.146511	gene4420	0.95
MSTRG.146511	gene4445	0.9667
MSTRG.146511	gene475	0.9667
MSTRG.146511	gene4781	1
MSTRG.146511	gene4793	0.9667
MSTRG.146511	gene5184	0.9833
MSTRG.146511	gene521	-0.95
MSTRG.146511	gene5316	0.9667
MSTRG.146511	gene5322	-0.9667
MSTRG.146511	gene5466	0.9833
MSTRG.146511	gene562	0.95
MSTRG.146511	gene5878	0.95
MSTRG.146511	gene5892	-0.9667
MSTRG.146511	gene5923	0.95
MSTRG.146511	gene6131	0.9667
MSTRG.146511	gene6608	0.95
MSTRG.146511	gene6958	0.9667
MSTRG.146511	gene7085	-0.9667
MSTRG.146511	gene7151	0.95
MSTRG.146511	gene7229	0.9833
MSTRG.146511	gene7387	0.95
MSTRG.146511	gene7547	0.95
MSTRG.146511	gene7724	1
MSTRG.146511	gene7745	0.9667
MSTRG.146511	gene776	-0.9833
MSTRG.146511	gene7765	0.9667
MSTRG.146511	gene783	0.95
MSTRG.146511	gene7874	0.9667
MSTRG.146511	gene7932	-1
MSTRG.146511	gene8008	0.95
MSTRG.146511	gene8198	-0.9667
MSTRG.146511	gene8395	0.9667
MSTRG.146511	gene8415	0.9667
MSTRG.146511	gene8825	0.9667
MSTRG.146511	gene9437	0.9667
MSTRG.146511	gene9439	0.9667
MSTRG.146511	gene9681	0.9667
MSTRG.146511	gene9752	0.95
MSTRG.146511	gene9881	0.9667
MSTRG.146511	gene9919	0.95
MSTRG.146552	gene11002	0.95
MSTRG.146552	gene11625	0.9667
MSTRG.146552	gene12206	0.9667
MSTRG.146552	gene12236	-0.9667
MSTRG.146552	gene12842	0.95
MSTRG.146552	gene13696	0.9667
MSTRG.146552	gene15855	0.9667
MSTRG.146552	gene16913	0.9667
MSTRG.146552	gene20244	-0.95
MSTRG.146552	gene20809	0.95
MSTRG.146552	gene20833	0.95
MSTRG.146552	gene21382	0.95
MSTRG.146552	gene21990	0.95
MSTRG.146552	gene23661	0.95
MSTRG.146552	gene26100	1
MSTRG.146552	gene28122	0.9667
MSTRG.146552	gene4410	-0.95
MSTRG.146552	gene5413	0.95
MSTRG.146552	gene5484	0.9667
MSTRG.146552	gene6417	-0.9667
MSTRG.146552	gene8535	0.95
MSTRG.151812	gene10216	0.95
MSTRG.151812	gene11010	0.9667
MSTRG.151812	gene13438	-0.9667
MSTRG.151812	gene13790	-0.95
MSTRG.151812	gene23017	0.9667
MSTRG.151812	gene24525	-0.95
MSTRG.151812	gene25294	1
MSTRG.151812	gene5673	0.9667
MSTRG.151812	gene803	0.95
MSTRG.151965	gene21755	0.9574
MSTRG.152489	gene10385	-0.9791
MSTRG.152489	gene12454	-0.9791
MSTRG.152489	gene12764	-0.9707
MSTRG.152489	gene13670	-0.9624
MSTRG.152489	gene13728	-0.9624
MSTRG.152489	gene13804	-0.9624
MSTRG.152489	gene14247	-0.9791
MSTRG.152489	gene15872	-0.9624
MSTRG.152489	gene16666	-0.9791
MSTRG.152489	gene17047	-0.9791
MSTRG.152489	gene17884	-0.9791
MSTRG.152489	gene17964	-0.9791
MSTRG.152489	gene20240	-0.9624
MSTRG.152489	gene20269	-0.9791
MSTRG.152489	gene20670	-0.9791
MSTRG.152489	gene2196	0.9707
MSTRG.152489	gene2393	-0.9958
MSTRG.152489	gene27227	-0.9958
MSTRG.152489	gene27337	-0.9791
MSTRG.152489	gene27951	-0.9791
MSTRG.152489	gene28264	-0.9624
MSTRG.152489	gene2944	-0.9958
MSTRG.152489	gene3485	-0.9624
MSTRG.152489	gene4274	-0.9624
MSTRG.152489	gene4288	-0.9624
MSTRG.152489	gene4302	-0.9624
MSTRG.152489	gene4562	-0.9624
MSTRG.152489	gene549	-0.9624
MSTRG.152489	gene5853	-0.9791
MSTRG.152489	gene6187	-0.9791
MSTRG.152489	gene701	-0.9958
MSTRG.152489	gene789	-0.9624
MSTRG.152489	gene7936	-0.9791
MSTRG.152489	gene9398	-0.954
MSTRG.152489	gene9402	0.9624
MSTRG.153038	gene19711	0.95
MSTRG.153038	gene2035	0.9667
MSTRG.167641	gene13246	-0.9791
MSTRG.167641	gene13464	0.954
MSTRG.167641	gene17556	-0.9791
MSTRG.167641	gene24912	0.9624
MSTRG.167641	gene3392	0.9707
MSTRG.167641	gene6327	-0.9624
MSTRG.167641	gene9820	-0.9624
MSTRG.171181	gene15739	0.9667
MSTRG.171181	gene16549	-0.95
MSTRG.171181	gene16619	-0.95
MSTRG.171181	gene17162	-0.9667
MSTRG.171181	gene24861	0.9833
MSTRG.171181	gene26165	0.95
MSTRG.171181	gene26540	-0.9667
MSTRG.171181	gene27069	-0.9667
MSTRG.171181	gene2979	-0.9667
MSTRG.171181	gene3911	-0.9667
MSTRG.171181	gene4016	-0.9667
MSTRG.171181	gene5426	0.9667
MSTRG.171181	gene6155	0.9667
MSTRG.172759	gene10153	0.9833
MSTRG.172759	gene10185	-0.9667
MSTRG.172759	gene10351	0.95
MSTRG.172759	gene10385	0.95
MSTRG.172759	gene10693	0.9667
MSTRG.172759	gene10725	0.95
MSTRG.172759	gene10871	0.95
MSTRG.172759	gene11142	0.9667
MSTRG.172759	gene11190	0.9667
MSTRG.172759	gene11877	0.95
MSTRG.172759	gene11899	0.9667
MSTRG.172759	gene12320	-0.9667
MSTRG.172759	gene12454	0.95
MSTRG.172759	gene12459	0.9667
MSTRG.172759	gene12764	0.9667
MSTRG.172759	gene12816	0.9667
MSTRG.172759	gene12875	0.95
MSTRG.172759	gene12974	0.9667
MSTRG.172759	gene12992	0.9833
MSTRG.172759	gene13230	-0.95
MSTRG.172759	gene13935	0.9667
MSTRG.172759	gene13953	0.95
MSTRG.172759	gene14098	0.95
MSTRG.172759	gene14247	0.9667
MSTRG.172759	gene1460	-0.9667
MSTRG.172759	gene15037	-0.95
MSTRG.172759	gene15156	0.95
MSTRG.172759	gene15918	0.9833
MSTRG.172759	gene1601	0.95
MSTRG.172759	gene1612	0.9667
MSTRG.172759	gene16197	0.9667
MSTRG.172759	gene16201	-0.9667
MSTRG.172759	gene16693	0.95
MSTRG.172759	gene16697	0.95
MSTRG.172759	gene16747	0.95
MSTRG.172759	gene17047	0.95
MSTRG.172759	gene17094	0.9667
MSTRG.172759	gene17175	-0.95
MSTRG.172759	gene17806	0.9833
MSTRG.172759	gene17884	0.95
MSTRG.172759	gene17964	1
MSTRG.172759	gene1881	0.9833
MSTRG.172759	gene18868	0.95
MSTRG.172759	gene18930	0.95
MSTRG.172759	gene19061	0.95
MSTRG.172759	gene19283	-0.95
MSTRG.172759	gene19726	0.9833
MSTRG.172759	gene19734	0.9667
MSTRG.172759	gene20184	-0.9667
MSTRG.172759	gene20670	0.95
MSTRG.172759	gene20702	0.9667
MSTRG.172759	gene20707	0.95
MSTRG.172759	gene20897	0.9667
MSTRG.172759	gene2124	-0.9667
MSTRG.172759	gene21507	0.95
MSTRG.172759	gene21795	0.95
MSTRG.172759	gene2196	-0.9667
MSTRG.172759	gene22757	0.95
MSTRG.172759	gene2296	0.9667
MSTRG.172759	gene23804	0.9667
MSTRG.172759	gene2393	0.9667
MSTRG.172759	gene24840	-0.95
MSTRG.172759	gene25007	0.9667
MSTRG.172759	gene2502	0.9833
MSTRG.172759	gene25125	0.95
MSTRG.172759	gene25202	-0.9667
MSTRG.172759	gene2521	-0.9667
MSTRG.172759	gene25269	0.9667
MSTRG.172759	gene25284	0.9667
MSTRG.172759	gene25289	0.95
MSTRG.172759	gene25292	0.9667
MSTRG.172759	gene25306	0.9667
MSTRG.172759	gene25321	-0.95
MSTRG.172759	gene25438	-0.95
MSTRG.172759	gene25569	0.95
MSTRG.172759	gene26058	0.95
MSTRG.172759	gene26373	0.95
MSTRG.172759	gene26880	0.9667
MSTRG.172759	gene26986	-0.9667
MSTRG.172759	gene27227	0.9833
MSTRG.172759	gene28157	0.9667
MSTRG.172759	gene28264	0.9833
MSTRG.172759	gene28377	0.95
MSTRG.172759	gene2944	0.9833
MSTRG.172759	gene3082	-0.9667
MSTRG.172759	gene3459	-0.95
MSTRG.172759	gene3543	0.95
MSTRG.172759	gene3833	-0.95
MSTRG.172759	gene3842	0.9833
MSTRG.172759	gene4103	0.95
MSTRG.172759	gene4302	0.9667
MSTRG.172759	gene445	0.95
MSTRG.172759	gene4562	0.9667
MSTRG.172759	gene475	0.95
MSTRG.172759	gene5786	0.9667
MSTRG.172759	gene5837	0.9667
MSTRG.172759	gene5853	0.9833
MSTRG.172759	gene5863	0.95
MSTRG.172759	gene6050	-0.9667
MSTRG.172759	gene6187	0.95
MSTRG.172759	gene6216	0.9667
MSTRG.172759	gene6946	-0.9833
MSTRG.172759	gene6965	0.9667
MSTRG.172759	gene701	0.9833
MSTRG.172759	gene7547	0.9667
MSTRG.172759	gene756	0.95
MSTRG.172759	gene7895	0.95
MSTRG.172759	gene7936	1
MSTRG.172759	gene7982	0.9833
MSTRG.172759	gene8198	-0.95
MSTRG.172759	gene8303	0.95
MSTRG.172759	gene8395	0.95
MSTRG.172759	gene9402	-0.9833
MSTRG.172759	gene9403	0.9667
MSTRG.172759	gene9785	0.9667
MSTRG.172760	gene11287	0.95
MSTRG.172760	gene11865	-0.9667
MSTRG.172760	gene11962	-0.9667
MSTRG.172760	gene11963	0.9667
MSTRG.172760	gene12011	-0.95
MSTRG.172760	gene12050	-0.95
MSTRG.172760	gene1226	-0.95
MSTRG.172760	gene12412	-0.9667
MSTRG.172760	gene12743	-0.95
MSTRG.172760	gene13270	-0.9667
MSTRG.172760	gene13311	0.9667
MSTRG.172760	gene13389	-0.9667
MSTRG.172760	gene13548	-0.9667
MSTRG.172760	gene14448	-0.95
MSTRG.172760	gene14531	-0.9667
MSTRG.172760	gene15039	-0.9667
MSTRG.172760	gene15045	-0.95
MSTRG.172760	gene15049	-0.95
MSTRG.172760	gene15056	-0.95
MSTRG.172760	gene15069	-0.9667
MSTRG.172760	gene16209	-0.95
MSTRG.172760	gene16570	0.95
MSTRG.172760	gene1707	-0.95
MSTRG.172760	gene17198	-0.9667
MSTRG.172760	gene17655	-0.9667
MSTRG.172760	gene18009	-0.9833
MSTRG.172760	gene18010	-0.95
MSTRG.172760	gene18011	-0.9667
MSTRG.172760	gene18407	0.95
MSTRG.172760	gene1873	-0.95
MSTRG.172760	gene1896	-0.95
MSTRG.172760	gene1925	0.9667
MSTRG.172760	gene1961	0.9667
MSTRG.172760	gene20659	-0.9833
MSTRG.172760	gene22205	-0.9833
MSTRG.172760	gene22396	-0.9667
MSTRG.172760	gene23223	-0.9667
MSTRG.172760	gene2357	-0.95
MSTRG.172760	gene23763	-0.95
MSTRG.172760	gene23924	0.9667
MSTRG.172760	gene2428	-0.95
MSTRG.172760	gene2431	-0.9667
MSTRG.172760	gene24346	0.9667
MSTRG.172760	gene2457	0.95
MSTRG.172760	gene24621	-0.9667
MSTRG.172760	gene2464	-0.9667
MSTRG.172760	gene24666	-0.9667
MSTRG.172760	gene25160	-0.95
MSTRG.172760	gene25419	-0.9833
MSTRG.172760	gene25852	-0.9667
MSTRG.172760	gene2606	0.95
MSTRG.172760	gene26542	0.9667
MSTRG.172760	gene26681	-0.95
MSTRG.172760	gene27099	-0.95
MSTRG.172760	gene27276	0.9667
MSTRG.172760	gene27674	0.9833
MSTRG.172760	gene27828	-0.9667
MSTRG.172760	gene28068	-0.9667
MSTRG.172760	gene28143	0.9667
MSTRG.172760	gene3293	-0.9667
MSTRG.172760	gene3299	0.9833
MSTRG.172760	gene3410	-0.95
MSTRG.172760	gene3434	-0.95
MSTRG.172760	gene3446	-0.95
MSTRG.172760	gene3472	0.9833
MSTRG.172760	gene360	1
MSTRG.172760	gene3843	0.95
MSTRG.172760	gene4010	-0.9833
MSTRG.172760	gene4279	-0.95
MSTRG.172760	gene4284	-0.9667
MSTRG.172760	gene4325	-0.9833
MSTRG.172760	gene5748	0.95
MSTRG.172760	gene6291	-0.9667
MSTRG.172760	gene6641	-0.9667
MSTRG.172760	gene6959	-0.95
MSTRG.172760	gene780	-0.95
MSTRG.172760	gene8031	-0.95
MSTRG.172760	gene8659	-0.9833
MSTRG.172760	gene9154	-0.95
MSTRG.172760	gene9804	-0.9833
MSTRG.172760	gene9982	-0.9667
MSTRG.172760	gene9989	-0.9833
MSTRG.173186	gene11157	0.9667
MSTRG.173186	gene11594	0.9667
MSTRG.173186	gene11904	-0.9833
MSTRG.173186	gene11908	0.95
MSTRG.173186	gene12075	0.9667
MSTRG.173186	gene12110	1
MSTRG.173186	gene12307	0.95
MSTRG.173186	gene12735	0.9833
MSTRG.173186	gene13393	0.9667
MSTRG.173186	gene14095	0.95
MSTRG.173186	gene14109	0.9667
MSTRG.173186	gene15801	0.95
MSTRG.173186	gene16500	0.9667
MSTRG.173186	gene16553	0.95
MSTRG.173186	gene19034	0.95
MSTRG.173186	gene19178	0.9667
MSTRG.173186	gene19633	0.95
MSTRG.173186	gene20164	0.9667
MSTRG.173186	gene20323	0.95
MSTRG.173186	gene20604	0.9833
MSTRG.173186	gene21392	0.95
MSTRG.173186	gene22109	0.9833
MSTRG.173186	gene24661	0.9833
MSTRG.173186	gene2484	-0.9833
MSTRG.173186	gene25121	-0.9833
MSTRG.173186	gene25191	0.95
MSTRG.173186	gene25958	0.9833
MSTRG.173186	gene27334	0.95
MSTRG.173186	gene28058	0.9833
MSTRG.173186	gene2942	0.9667
MSTRG.173186	gene3429	0.95
MSTRG.173186	gene3567	-0.95
MSTRG.173186	gene4540	0.9667
MSTRG.173186	gene4598	0.9833
MSTRG.173186	gene5219	0.9667
MSTRG.173186	gene5745	0.9667
MSTRG.173186	gene5887	0.9833
MSTRG.173186	gene5983	0.95
MSTRG.173186	gene6279	0.95
MSTRG.173186	gene6404	0.9667
MSTRG.173186	gene6896	0.9833
MSTRG.173186	gene7223	0.95
MSTRG.173186	gene781	0.95
MSTRG.173186	gene8419	0.95
MSTRG.173186	gene8501	-0.95
MSTRG.173186	gene873	0.95
MSTRG.173186	gene9983	0.9833
MSTRG.17509	gene10445	-0.9667
MSTRG.17509	gene11706	-0.9667
MSTRG.17509	gene13716	-0.95
MSTRG.17509	gene15885	-0.95
MSTRG.17509	gene17938	0.95
MSTRG.17509	gene21502	-0.9667
MSTRG.17509	gene25148	0.9667
MSTRG.17509	gene27430	0.95
MSTRG.17509	gene27742	0.9667
MSTRG.17509	gene2914	-0.9833
MSTRG.17509	gene3138	-0.95
MSTRG.17509	gene4713	-0.9667
MSTRG.17509	gene5992	-0.95
MSTRG.17509	gene9265	0.9833
MSTRG.17509	gene9805	-0.95
MSTRG.176976	gene14206	0.95
MSTRG.176976	gene18054	0.95
MSTRG.176976	gene18830	0.95
MSTRG.176976	gene24601	0.95
MSTRG.176976	gene28199	0.95
MSTRG.176976	gene392	0.9667
MSTRG.181944	gene11689	-0.95
MSTRG.181944	gene11753	-0.9667
MSTRG.181944	gene1202	0.9667
MSTRG.181944	gene14648	0.9667
MSTRG.181944	gene21129	-0.95
MSTRG.181944	gene25397	-0.95
MSTRG.183846	gene10430	-0.9667
MSTRG.183846	gene10666	-0.9667
MSTRG.183846	gene10758	-0.9833
MSTRG.183846	gene10835	0.9833
MSTRG.183846	gene10867	-0.95
MSTRG.183846	gene10897	0.95
MSTRG.183846	gene11146	1
MSTRG.183846	gene11244	0.9833
MSTRG.183846	gene11963	0.9667
MSTRG.183846	gene12011	-0.95
MSTRG.183846	gene12269	0.9667
MSTRG.183846	gene12297	-0.9833
MSTRG.183846	gene12337	-0.9667
MSTRG.183846	gene12875	0.95
MSTRG.183846	gene13187	-0.9667
MSTRG.183846	gene13683	0.9667
MSTRG.183846	gene13731	0.9667
MSTRG.183846	gene13979	-0.95
MSTRG.183846	gene14051	-0.95
MSTRG.183846	gene14088	-0.9667
MSTRG.183846	gene15052	-0.95
MSTRG.183846	gene15728	-0.95
MSTRG.183846	gene16854	-0.95
MSTRG.183846	gene1759	-0.9833
MSTRG.183846	gene18083	0.95
MSTRG.183846	gene1873	-0.95
MSTRG.183846	gene19009	-0.9833
MSTRG.183846	gene19061	0.95
MSTRG.183846	gene19182	-0.9833
MSTRG.183846	gene19283	-0.95
MSTRG.183846	gene20318	0.95
MSTRG.183846	gene2038	-0.95
MSTRG.183846	gene20413	-0.9833
MSTRG.183846	gene20481	0.95
MSTRG.183846	gene21690	-0.9667
MSTRG.183846	gene2202	0.9667
MSTRG.183846	gene23003	0.95
MSTRG.183846	gene25160	-0.95
MSTRG.183846	gene2518	0.9667
MSTRG.183846	gene25321	-0.95
MSTRG.183846	gene26520	0.95
MSTRG.183846	gene27526	0.95
MSTRG.183846	gene28239	-0.9667
MSTRG.183846	gene2916	-0.9667
MSTRG.183846	gene3140	-0.9667
MSTRG.183846	gene3330	0.95
MSTRG.183846	gene3833	-0.95
MSTRG.183846	gene4182	0.95
MSTRG.183846	gene4284	-0.9667
MSTRG.183846	gene4301	-0.95
MSTRG.183846	gene4331	-0.9833
MSTRG.183846	gene5182	0.9667
MSTRG.183846	gene5357	0.95
MSTRG.183846	gene5951	-0.9833
MSTRG.183846	gene600	1
MSTRG.183846	gene6188	0.9833
MSTRG.183846	gene6753	0.95
MSTRG.183846	gene7081	-0.95
MSTRG.183846	gene7092	-0.95
MSTRG.183846	gene7888	0.9667
MSTRG.183846	gene7895	0.95
MSTRG.183846	gene8252	-0.9667
MSTRG.183846	gene8586	-0.95
MSTRG.186393	gene10368	-0.9574
MSTRG.186393	gene16862	0.9574
MSTRG.186393	gene24657	0.9574
MSTRG.186393	gene2936	-0.9574
MSTRG.186393	gene4502	0.9574
MSTRG.186393	gene7761	-0.9574
MSTRG.186393	gene7854	0.9574
MSTRG.191433	gene10640	-0.9574
MSTRG.191433	gene11706	-0.9574
MSTRG.191433	gene11844	-0.9574
MSTRG.191433	gene17027	0.9574
MSTRG.191433	gene19564	0.9574
MSTRG.191433	gene25148	0.9574
MSTRG.191433	gene2914	-0.9574
MSTRG.191433	gene9265	0.9574
MSTRG.212222	gene10310	1
MSTRG.212222	gene10351	0.95
MSTRG.212222	gene10603	1
MSTRG.212222	gene10889	0.95
MSTRG.212222	gene10974	0.9667
MSTRG.212222	gene11802	0.9667
MSTRG.212222	gene12491	0.95
MSTRG.212222	gene13386	-0.9667
MSTRG.212222	gene13683	0.95
MSTRG.212222	gene13806	0.9667
MSTRG.212222	gene13857	-0.9667
MSTRG.212222	gene14050	0.9667
MSTRG.212222	gene141	0.95
MSTRG.212222	gene14176	0.95
MSTRG.212222	gene15037	-0.95
MSTRG.212222	gene15039	-0.95
MSTRG.212222	gene15069	-0.95
MSTRG.212222	gene152	0.9667
MSTRG.212222	gene16693	0.95
MSTRG.212222	gene17198	-0.95
MSTRG.212222	gene17655	-0.95
MSTRG.212222	gene1925	0.95
MSTRG.212222	gene19362	0.9833
MSTRG.212222	gene20387	0.9667
MSTRG.212222	gene20592	0.9667
MSTRG.212222	gene209	0.95
MSTRG.212222	gene22396	-0.95
MSTRG.212222	gene22972	0.95
MSTRG.212222	gene2464	-0.95
MSTRG.212222	gene24666	-0.95
MSTRG.212222	gene25852	-0.95
MSTRG.212222	gene26592	-0.9833
MSTRG.212222	gene26685	0.95
MSTRG.212222	gene26784	0.95
MSTRG.212222	gene27150	0.9833
MSTRG.212222	gene27959	-0.95
MSTRG.212222	gene28068	-0.95
MSTRG.212222	gene2928	0.9667
MSTRG.212222	gene3293	-0.95
MSTRG.212222	gene3528	0.9667
MSTRG.212222	gene3543	0.95
MSTRG.212222	gene359	0.95
MSTRG.212222	gene389	-0.9667
MSTRG.212222	gene4103	0.95
MSTRG.212222	gene435	0.95
MSTRG.212222	gene5182	0.95
MSTRG.212222	gene5406	0.9667
MSTRG.212222	gene5863	0.95
MSTRG.212222	gene6291	-0.95
MSTRG.212222	gene748	0.9667
MSTRG.212277	gene10721	0.95
MSTRG.212277	gene11273	0.95
MSTRG.212277	gene11800	-0.9667
MSTRG.212277	gene13129	0.95
MSTRG.212277	gene17187	0.95
MSTRG.212277	gene18174	-0.95
MSTRG.212277	gene196	-0.9667
MSTRG.212277	gene19718	0.9667
MSTRG.212277	gene20534	0.95
MSTRG.212277	gene20596	0.95
MSTRG.212277	gene20672	0.9667
MSTRG.212277	gene22217	0.95
MSTRG.212277	gene24741	0.9833
MSTRG.212277	gene24917	0.9833
MSTRG.212277	gene26063	-0.9667
MSTRG.212277	gene27467	-0.95
MSTRG.212277	gene28085	0.9667
MSTRG.212277	gene4181	0.9667
MSTRG.212277	gene5194	-0.9667
MSTRG.212277	gene5986	-0.95
MSTRG.212277	gene6142	0.95
MSTRG.212277	gene7933	-0.95
MSTRG.212277	gene8670	0.95
MSTRG.212277	gene9531	0.95
MSTRG.217423	gene10425	-0.95
MSTRG.217423	gene10459	-0.9667
MSTRG.217423	gene11143	0.95
MSTRG.217423	gene13569	0.95
MSTRG.217423	gene14367	-0.95
MSTRG.217423	gene14448	-0.95
MSTRG.217423	gene17034	-0.9833
MSTRG.217423	gene18649	0.9833
MSTRG.217423	gene20509	-0.9667
MSTRG.217423	gene20521	1
MSTRG.217423	gene22005	-0.9667
MSTRG.217423	gene22505	0.9667
MSTRG.217423	gene2305	-0.9667
MSTRG.217423	gene23924	0.9667
MSTRG.217423	gene24741	0.9667
MSTRG.217423	gene24814	0.9667
MSTRG.217423	gene24917	0.9667
MSTRG.217423	gene3058	0.95
MSTRG.217423	gene4015	-0.9667
MSTRG.217423	gene9985	-0.9667
MSTRG.217466	gene10323	0.9667
MSTRG.217466	gene10905	0.95
MSTRG.217466	gene13908	0.95
MSTRG.217466	gene15300	0.9667
MSTRG.217466	gene16960	0.9667
MSTRG.217466	gene19624	0.95
MSTRG.217466	gene1978	0.9667
MSTRG.217466	gene20115	0.95
MSTRG.217466	gene20404	0.9667
MSTRG.217466	gene22347	0.95
MSTRG.217466	gene2278	0.95
MSTRG.217466	gene25348	0.95
MSTRG.217466	gene268	0.95
MSTRG.217466	gene27009	-0.9833
MSTRG.217466	gene5722	0.95
MSTRG.217466	gene7742	-0.95
MSTRG.217466	gene9885	0.95
MSTRG.218627	gene11440	0.9574
MSTRG.218627	gene13908	0.9574
MSTRG.218627	gene1633	0.9574
MSTRG.218627	gene16960	0.9574
MSTRG.218627	gene20115	0.9574
MSTRG.218627	gene2198	0.9574
MSTRG.218627	gene24216	0.9574
MSTRG.218627	gene28119	0.9574
MSTRG.218627	gene3959	0.9574
MSTRG.219231	gene11273	0.9574
MSTRG.219231	gene25253	0.9574
MSTRG.219231	gene2621	0.9574
MSTRG.219231	gene7933	-0.9574
MSTRG.219231	gene8396	0.9574
MSTRG.222083	gene10310	0.9833
MSTRG.222083	gene10603	0.9833
MSTRG.222083	gene10974	0.95
MSTRG.222083	gene11244	0.95
MSTRG.222083	gene11802	0.9833
MSTRG.222083	gene12297	-0.9667
MSTRG.222083	gene12491	0.9667
MSTRG.222083	gene13386	-0.95
MSTRG.222083	gene13806	0.9833
MSTRG.222083	gene14050	0.95
MSTRG.222083	gene152	0.95
MSTRG.222083	gene16569	0.95
MSTRG.222083	gene19362	0.9667
MSTRG.222083	gene20387	0.95
MSTRG.222083	gene20592	0.95
MSTRG.222083	gene209	0.9667
MSTRG.222083	gene25847	-0.95
MSTRG.222083	gene26592	-0.9667
MSTRG.222083	gene26784	0.9667
MSTRG.222083	gene27150	0.9667
MSTRG.222083	gene2809	0.95
MSTRG.222083	gene2928	0.95
MSTRG.222083	gene3528	0.95
MSTRG.222083	gene359	0.9667
MSTRG.222083	gene389	-0.95
MSTRG.222083	gene4301	-0.9667
MSTRG.222083	gene5406	0.95
MSTRG.222083	gene6583	-0.95
MSTRG.222083	gene748	0.95
MSTRG.222083	gene7894	0.95
MSTRG.222128	gene10310	0.95
MSTRG.222128	gene10603	0.95
MSTRG.222128	gene10889	0.9667
MSTRG.222128	gene11802	0.9833
MSTRG.222128	gene12491	0.9667
MSTRG.222128	gene13386	-0.95
MSTRG.222128	gene13806	0.9833
MSTRG.222128	gene14050	0.95
MSTRG.222128	gene14176	0.9667
MSTRG.222128	gene14756	0.9833
MSTRG.222128	gene152	0.95
MSTRG.222128	gene16569	0.9667
MSTRG.222128	gene18083	0.95
MSTRG.222128	gene19020	0.9667
MSTRG.222128	gene19362	0.9667
MSTRG.222128	gene20387	0.9833
MSTRG.222128	gene20592	0.95
MSTRG.222128	gene209	1
MSTRG.222128	gene22921	0.95
MSTRG.222128	gene22972	0.95
MSTRG.222128	gene26520	0.95
MSTRG.222128	gene26592	-0.9667
MSTRG.222128	gene26685	0.95
MSTRG.222128	gene26784	0.9667
MSTRG.222128	gene27344	0.9667
MSTRG.222128	gene27959	-0.95
MSTRG.222128	gene2928	0.95
MSTRG.222128	gene3528	0.95
MSTRG.222128	gene359	0.9667
MSTRG.222128	gene389	-0.95
MSTRG.222128	gene4301	-0.9667
MSTRG.222128	gene435	0.95
MSTRG.222128	gene6583	-0.9667
MSTRG.222128	gene67	-0.9667
MSTRG.222128	gene748	0.95
MSTRG.222129	gene1003	0.95
MSTRG.222129	gene10076	0.95
MSTRG.222129	gene10247	-0.9667
MSTRG.222129	gene10269	0.95
MSTRG.222129	gene10591	0.95
MSTRG.222129	gene10605	0.95
MSTRG.222129	gene11263	0.9833
MSTRG.222129	gene11290	0.9833
MSTRG.222129	gene11388	0.9667
MSTRG.222129	gene11588	0.9833
MSTRG.222129	gene11663	0.9833
MSTRG.222129	gene11675	0.9667
MSTRG.222129	gene11784	0.95
MSTRG.222129	gene11835	0.9833
MSTRG.222129	gene11850	-0.95
MSTRG.222129	gene11960	0.9833
MSTRG.222129	gene11975	0.95
MSTRG.222129	gene1200	0.9667
MSTRG.222129	gene12087	0.9667
MSTRG.222129	gene12863	0.9667
MSTRG.222129	gene1317	0.9667
MSTRG.222129	gene13502	0.95
MSTRG.222129	gene13627	0.95
MSTRG.222129	gene1364	0.9833
MSTRG.222129	gene13763	0.9667
MSTRG.222129	gene13890	0.9833
MSTRG.222129	gene1392	-0.9833
MSTRG.222129	gene14158	0.95
MSTRG.222129	gene14197	0.95
MSTRG.222129	gene14268	0.95
MSTRG.222129	gene14565	0.9667
MSTRG.222129	gene14973	0.95
MSTRG.222129	gene15729	0.95
MSTRG.222129	gene16359	0.9833
MSTRG.222129	gene16594	0.9833
MSTRG.222129	gene16625	0.95
MSTRG.222129	gene16689	0.95
MSTRG.222129	gene16719	0.95
MSTRG.222129	gene16860	0.95
MSTRG.222129	gene16867	0.9667
MSTRG.222129	gene1692	1
MSTRG.222129	gene16935	0.95
MSTRG.222129	gene17114	0.9667
MSTRG.222129	gene17164	0.9833
MSTRG.222129	gene17234	0.95
MSTRG.222129	gene17263	0.9667
MSTRG.222129	gene17388	0.9667
MSTRG.222129	gene17482	0.9667
MSTRG.222129	gene17939	0.95
MSTRG.222129	gene17945	0.9667
MSTRG.222129	gene17974	0.9833
MSTRG.222129	gene18093	0.95
MSTRG.222129	gene18431	0.9833
MSTRG.222129	gene18863	0.9833
MSTRG.222129	gene1893	0.95
MSTRG.222129	gene1905	0.9667
MSTRG.222129	gene1918	0.9833
MSTRG.222129	gene19256	0.9833
MSTRG.222129	gene19693	0.9833
MSTRG.222129	gene19762	0.9667
MSTRG.222129	gene2000	0.95
MSTRG.222129	gene20595	0.9667
MSTRG.222129	gene20612	0.9833
MSTRG.222129	gene20764	0.9667
MSTRG.222129	gene2079	0.95
MSTRG.222129	gene20832	1
MSTRG.222129	gene21034	0.95
MSTRG.222129	gene21080	0.9667
MSTRG.222129	gene21139	0.95
MSTRG.222129	gene21328	0.95
MSTRG.222129	gene21434	0.95
MSTRG.222129	gene21567	0.9667
MSTRG.222129	gene21678	0.9667
MSTRG.222129	gene21692	0.9833
MSTRG.222129	gene21752	0.9833
MSTRG.222129	gene21978	-1
MSTRG.222129	gene22083	0.95
MSTRG.222129	gene22117	0.95
MSTRG.222129	gene2225	0.95
MSTRG.222129	gene22324	0.9833
MSTRG.222129	gene22418	0.95
MSTRG.222129	gene22497	0.95
MSTRG.222129	gene22675	0.9667
MSTRG.222129	gene22946	0.95
MSTRG.222129	gene22950	-0.95
MSTRG.222129	gene23361	0.9833
MSTRG.222129	gene23365	0.9833
MSTRG.222129	gene23368	0.9667
MSTRG.222129	gene23876	0.9667
MSTRG.222129	gene24256	0.9667
MSTRG.222129	gene24326	0.9667
MSTRG.222129	gene24796	0.9833
MSTRG.222129	gene24806	0.95
MSTRG.222129	gene24898	1
MSTRG.222129	gene2520	0.9667
MSTRG.222129	gene25326	0.95
MSTRG.222129	gene2571	0.95
MSTRG.222129	gene25807	-0.95
MSTRG.222129	gene25817	0.9833
MSTRG.222129	gene25935	0.95
MSTRG.222129	gene25946	0.95
MSTRG.222129	gene26090	0.9667
MSTRG.222129	gene26263	0.95
MSTRG.222129	gene26317	0.9833
MSTRG.222129	gene26526	0.95
MSTRG.222129	gene26714	0.95
MSTRG.222129	gene26974	0.9667
MSTRG.222129	gene27064	0.9667
MSTRG.222129	gene27289	0.95
MSTRG.222129	gene27442	0.95
MSTRG.222129	gene27527	0.9833
MSTRG.222129	gene27530	0.95
MSTRG.222129	gene27600	0.95
MSTRG.222129	gene27706	0.95
MSTRG.222129	gene27720	1
MSTRG.222129	gene27730	0.9667
MSTRG.222129	gene27904	0.9833
MSTRG.222129	gene2797	0.9667
MSTRG.222129	gene28036	0.95
MSTRG.222129	gene28180	0.95
MSTRG.222129	gene28221	0.9833
MSTRG.222129	gene2861	0.95
MSTRG.222129	gene305	0.9667
MSTRG.222129	gene3264	0.9667
MSTRG.222129	gene3324	0.95
MSTRG.222129	gene3506	0.95
MSTRG.222129	gene3585	-0.95
MSTRG.222129	gene3780	0.9667
MSTRG.222129	gene3888	0.9667
MSTRG.222129	gene4358	0.9833
MSTRG.222129	gene5069	0.9667
MSTRG.222129	gene5175	0.9667
MSTRG.222129	gene5316	0.95
MSTRG.222129	gene5508	0.9667
MSTRG.222129	gene565	0.95
MSTRG.222129	gene5682	0.95
MSTRG.222129	gene5926	0.95
MSTRG.222129	gene6427	0.95
MSTRG.222129	gene6621	0.9667
MSTRG.222129	gene6691	0.95
MSTRG.222129	gene6737	0.95
MSTRG.222129	gene6887	0.95
MSTRG.222129	gene6960	0.95
MSTRG.222129	gene7151	0.9667
MSTRG.222129	gene7507	0.95
MSTRG.222129	gene7765	0.95
MSTRG.222129	gene7874	0.95
MSTRG.222129	gene7937	0.9833
MSTRG.222129	gene8126	0.9833
MSTRG.222129	gene8210	0.95
MSTRG.222129	gene8328	0.95
MSTRG.222129	gene8361	-0.9833
MSTRG.222129	gene8415	0.95
MSTRG.222129	gene8661	0.9667
MSTRG.222129	gene8663	0.95
MSTRG.222129	gene8678	0.9833
MSTRG.222129	gene8825	0.95
MSTRG.222129	gene9380	0.95
MSTRG.222129	gene9414	0.95
MSTRG.222129	gene9474	0.95
MSTRG.222129	gene969	0.9833
MSTRG.222129	gene9732	0.9833
MSTRG.222129	gene9790	0.9833
MSTRG.222129	gene9797	0.9667
MSTRG.222129	gene9919	0.9667
MSTRG.222129	gene999	0.9833
MSTRG.222159	gene10268	0.9667
MSTRG.222159	gene10459	-0.9667
MSTRG.222159	gene11143	0.95
MSTRG.222159	gene11228	0.9667
MSTRG.222159	gene11640	0.95
MSTRG.222159	gene11709	0.95
MSTRG.222159	gene12711	0.9833
MSTRG.222159	gene13410	0.95
MSTRG.222159	gene13448	0.95
MSTRG.222159	gene13569	1
MSTRG.222159	gene13712	0.9833
MSTRG.222159	gene13731	0.95
MSTRG.222159	gene13919	0.9833
MSTRG.222159	gene14244	0.9667
MSTRG.222159	gene14726	0.9833
MSTRG.222159	gene14730	0.9667
MSTRG.222159	gene16188	-0.95
MSTRG.222159	gene16365	0.9667
MSTRG.222159	gene16811	0.9833
MSTRG.222159	gene17707	0.95
MSTRG.222159	gene17894	0.95
MSTRG.222159	gene20095	0.9667
MSTRG.222159	gene20509	-0.9667
MSTRG.222159	gene20521	0.95
MSTRG.222159	gene22212	0.95
MSTRG.222159	gene2233	0.9667
MSTRG.222159	gene22505	0.9667
MSTRG.222159	gene23358	0.9833
MSTRG.222159	gene23890	0.9667
MSTRG.222159	gene24078	0.95
MSTRG.222159	gene24814	0.9667
MSTRG.222159	gene2518	0.95
MSTRG.222159	gene25403	0.95
MSTRG.222159	gene26079	-0.9667
MSTRG.222159	gene26594	-0.9667
MSTRG.222159	gene27230	-0.9667
MSTRG.222159	gene3408	-0.9667
MSTRG.222159	gene366	0.9833
MSTRG.222159	gene4015	-0.9667
MSTRG.222159	gene4410	-0.95
MSTRG.222159	gene5891	-0.9833
MSTRG.222159	gene592	-0.9667
MSTRG.222159	gene7311	0.95
MSTRG.222159	gene7888	0.95
MSTRG.222159	gene9835	-0.95
MSTRG.222885	gene11002	1
MSTRG.222885	gene11625	0.95
MSTRG.222885	gene12495	0.9667
MSTRG.222885	gene13213	-0.95
MSTRG.222885	gene13531	-0.95
MSTRG.222885	gene13696	0.95
MSTRG.222885	gene15855	0.95
MSTRG.222885	gene1722	-0.9667
MSTRG.222885	gene20244	-0.9667
MSTRG.222885	gene21525	0.9833
MSTRG.222885	gene21824	-0.9667
MSTRG.222885	gene21990	0.9667
MSTRG.222885	gene22945	-0.9833
MSTRG.222885	gene23661	0.95
MSTRG.222885	gene2452	-0.95
MSTRG.222885	gene25408	-0.9667
MSTRG.222885	gene25599	0.9667
MSTRG.222885	gene26100	0.95
MSTRG.222885	gene26126	0.95
MSTRG.222885	gene26978	0.95
MSTRG.222885	gene27550	0.95
MSTRG.222885	gene27991	0.95
MSTRG.222885	gene28122	0.95
MSTRG.222885	gene2853	0.9667
MSTRG.222885	gene2959	0.95
MSTRG.222885	gene4410	-0.95
MSTRG.222885	gene4518	0.9667
MSTRG.222885	gene5396	-0.9667
MSTRG.222885	gene5413	0.95
MSTRG.222885	gene5804	-0.9667
MSTRG.222885	gene6444	0.95
MSTRG.222885	gene8040	-0.9833
MSTRG.222885	gene8093	0.95
MSTRG.222885	gene8535	0.9667
MSTRG.222885	gene9815	-0.95
MSTRG.223128	gene20377	0.9574
MSTRG.223128	gene25962	-0.9574
MSTRG.223165	gene10310	0.95
MSTRG.223165	gene10603	0.95
MSTRG.223165	gene10889	0.9667
MSTRG.223165	gene11802	0.9833
MSTRG.223165	gene12491	0.9667
MSTRG.223165	gene13386	-0.95
MSTRG.223165	gene13806	0.9833
MSTRG.223165	gene14050	0.95
MSTRG.223165	gene14176	0.9667
MSTRG.223165	gene14756	0.9833
MSTRG.223165	gene152	0.95
MSTRG.223165	gene16569	0.9667
MSTRG.223165	gene18083	0.95
MSTRG.223165	gene19020	0.9667
MSTRG.223165	gene19362	0.9667
MSTRG.223165	gene20387	0.9833
MSTRG.223165	gene20592	0.95
MSTRG.223165	gene209	1
MSTRG.223165	gene22921	0.95
MSTRG.223165	gene22972	0.95
MSTRG.223165	gene26520	0.95
MSTRG.223165	gene26592	-0.9667
MSTRG.223165	gene26685	0.95
MSTRG.223165	gene26784	0.9667
MSTRG.223165	gene27344	0.9667
MSTRG.223165	gene27959	-0.95
MSTRG.223165	gene2928	0.95
MSTRG.223165	gene3528	0.95
MSTRG.223165	gene359	0.9667
MSTRG.223165	gene389	-0.95
MSTRG.223165	gene4301	-0.9667
MSTRG.223165	gene435	0.95
MSTRG.223165	gene6583	-0.9667
MSTRG.223165	gene67	-0.9667
MSTRG.223165	gene748	0.95
MSTRG.225489	gene10898	0.9574
MSTRG.225489	gene11236	0.9574
MSTRG.225489	gene11904	-0.9574
MSTRG.225489	gene12110	0.9574
MSTRG.225489	gene12411	-0.9574
MSTRG.225489	gene12735	0.9574
MSTRG.225489	gene13237	0.9574
MSTRG.225489	gene20604	0.9574
MSTRG.225489	gene2484	-0.9574
MSTRG.225489	gene28191	0.9574
MSTRG.225489	gene510	0.9574
MSTRG.225489	gene5983	0.9574
MSTRG.225489	gene7198	0.9574
MSTRG.225489	gene7990	-0.9574
MSTRG.225489	gene8419	0.9574
MSTRG.225490	gene10153	-0.9832
MSTRG.225490	gene10175	-0.9832
MSTRG.225490	gene10313	-0.9662
MSTRG.225490	gene10351	-0.9662
MSTRG.225490	gene10725	-0.9662
MSTRG.225490	gene11190	-0.9662
MSTRG.225490	gene11877	-0.9662
MSTRG.225490	gene12006	-0.9662
MSTRG.225490	gene12320	0.9662
MSTRG.225490	gene12459	-0.9832
MSTRG.225490	gene12816	-0.9662
MSTRG.225490	gene12974	-0.9662
MSTRG.225490	gene12992	-0.9832
MSTRG.225490	gene13552	-0.9662
MSTRG.225490	gene14098	-0.9662
MSTRG.225490	gene1460	0.9832
MSTRG.225490	gene15037	0.9662
MSTRG.225490	gene15156	-0.9662
MSTRG.225490	gene15367	0.9662
MSTRG.225490	gene15918	-0.9832
MSTRG.225490	gene1612	-0.9662
MSTRG.225490	gene16197	-0.9662
MSTRG.225490	gene16302	-0.9662
MSTRG.225490	gene16693	-0.9662
MSTRG.225490	gene17806	-0.9832
MSTRG.225490	gene17964	-0.9662
MSTRG.225490	gene1881	-0.9832
MSTRG.225490	gene18815	-0.9662
MSTRG.225490	gene20184	0.9832
MSTRG.225490	gene20310	-0.9662
MSTRG.225490	gene20702	-0.9662
MSTRG.225490	gene20897	-0.9832
MSTRG.225490	gene2124	0.9662
MSTRG.225490	gene22757	-0.9662
MSTRG.225490	gene24235	0.9832
MSTRG.225490	gene25007	-0.9662
MSTRG.225490	gene25201	0.9832
MSTRG.225490	gene25202	0.9662
MSTRG.225490	gene25256	-0.9662
MSTRG.225490	gene25284	-0.9662
MSTRG.225490	gene25292	-0.9832
MSTRG.225490	gene25306	-0.9662
MSTRG.225490	gene26986	0.9662
MSTRG.225490	gene2774	-0.9662
MSTRG.225490	gene28377	-0.9662
MSTRG.225490	gene3195	-0.9662
MSTRG.225490	gene3459	0.9662
MSTRG.225490	gene3543	-0.9662
MSTRG.225490	gene4103	-0.9662
MSTRG.225490	gene4419	-0.9662
MSTRG.225490	gene4604	0.9662
MSTRG.225490	gene5837	-0.9832
MSTRG.225490	gene5853	-0.9662
MSTRG.225490	gene5863	-0.9662
MSTRG.225490	gene6050	0.9662
MSTRG.225490	gene6216	-0.9662
MSTRG.225490	gene6965	-0.9832
MSTRG.225490	gene7201	-0.9662
MSTRG.225490	gene756	-0.9662
MSTRG.225490	gene7936	-0.9662
MSTRG.225490	gene7982	-0.9832
MSTRG.225490	gene8303	-0.9662
MSTRG.225490	gene8388	-0.9662
MSTRG.225490	gene918	0.9662
MSTRG.225490	gene9403	-0.9662
MSTRG.225491	gene10069	-0.95
MSTRG.225491	gene10153	-0.95
MSTRG.225491	gene10313	-0.9833
MSTRG.225491	gene10666	0.95
MSTRG.225491	gene10823	0.95
MSTRG.225491	gene11142	-0.95
MSTRG.225491	gene11190	-0.9667
MSTRG.225491	gene11877	-0.9833
MSTRG.225491	gene11899	-0.95
MSTRG.225491	gene11918	-0.95
[truncated: 7,540 more rows]
