# Supplementary material for: Transcriptomic Analysis Reveals the Involvement of lncRNA–miRNA–mRNA Networks in Hair Follicle Induction in Aohan Fine Wool Sheep Skin
Source: Front Genet. 2020 Jun 9;11:590. doi: 10.3389/fgene.2020.00590 (PMC7528302; doi:10.3389/fgene.2020.00590)
Supplement: TABLE S10 — Gene ontology annotation of differentially expressed miRNAs between E90d, E120d, and birth. [file Table_10.XLSX]

## Sheet: Sheet1
GO classification of differentially expressed mRNAs between Birth and E90d
Term_name	Term type	Accession	p-value	FDR	Alt_id	Background_Count	DE_Gene	DE_Count	Up_Gene	Up_Count	Down_Gene	Down_Count
muscle contraction	BP	GO:0006936	1.63162e-05	0.0104671	--	141	gene4423|gene14749|gene9783|gene22306|gene4007	5	gene4423|gene9783|gene14749|gene22306|gene4007	5	--	0
muscle system process	BP	GO:0003012	4.35525e-05	0.0104671	--	173	gene4423|gene14749|gene9783|gene22306|gene4007	5	gene4423|gene9783|gene14749|gene22306|gene4007	5	--	0
myofibril assembly	BP	GO:0030239	3.7768e-05	0.0104671	--	29	gene10319|gene22306|gene4007	3	gene10319|gene22306|gene4007	3	--	0
cellular component assembly involved in morphogenesis	BP	GO:0010927	0.000233074	0.0420117	--	53	gene10319|gene22306|gene4007	3	gene10319|gene22306|gene4007	3	--	0
contractile fiber part	CC	GO:0044449	6.35128e-08	8.51072e-06	--	241	gene10319|gene14749|gene9783|gene22306|gene26496|gene26381|gene4023|gene4007	8	gene10319|gene9783|gene14749|gene4023|gene4007|gene22306|gene26381|gene26496	8	--	0
intermediate filament	CC	GO:0005882	8.51859e-07	5.70745e-05	--	144	gene6371|gene21157|gene15069|gene15052|gene1707|gene1704	6	--	0	gene6371|gene15052|gene21157|gene1704|gene1707|gene15069	6
Z disc	CC	GO:0030018	0.00019851	0.00380004	--	128	gene10319|gene9783|gene26496|gene4023	4	gene10319|gene9783|gene4023|gene26496	4	--	0
striated muscle thin filament	CC	GO:0005865	0.000177279	0.00380004	--	9	gene22306|gene26381	2	gene22306|gene26381	2	--	0
supramolecular complex	CC	GO:0099080	0.000168221	0.00380004	--	706	gene6371|gene21157|gene1707|gene4423|gene1704|gene15052|gene26381|gene15069	8	gene4423|gene26381	2	gene6371|gene15052|gene21157|gene15069|gene1707|gene1704	6
supramolecular polymer	CC	GO:0099081	0.000168221	0.00380004	--	706	gene6371|gene21157|gene1707|gene4423|gene1704|gene15052|gene26381|gene15069	8	gene4423|gene26381	2	gene6371|gene15052|gene21157|gene15069|gene1707|gene1704	6
supramolecular fiber	CC	GO:0099512	0.000168221	0.00380004	GO:0043205	706	gene6371|gene21157|gene1707|gene4423|gene1704|gene15052|gene26381|gene15069	8	gene4423|gene26381	2	gene6371|gene15052|gene21157|gene15069|gene1707|gene1704	6
myofilament	CC	GO:0036379	0.000323607	0.00542042	--	12	gene22306|gene26381	2	gene22306|gene26381	2	--	0
myosin complex	CC	GO:0016459	0.000552651	0.00822835	--	71	gene4423|gene14749|gene26003	3	gene4423|gene14749|gene26003	3	--	0
polymeric cytoskeletal fiber	CC	GO:0099513	0.000631992	0.0084687	--	655	gene6371|gene21157|gene1707|gene15069|gene15052|gene26381|gene1704	7	gene26381	1	gene6371|gene15052|gene21157|gene1704|gene1707|gene15069	6
cytoskeletal part	CC	GO:0044430	0.00111392	0.0124666	--	1683	gene6371|gene14749|gene22306|gene26003|gene21157|gene1707|gene4423|gene1704|gene15052|gene26381|gene15069	11	gene4423|gene14749|gene22306|gene26381|gene26003	5	gene6371|gene15052|gene21157|gene15069|gene1707|gene1704	6
M band	CC	GO:0031430	0.00111641	0.0124666	--	22	gene22306|gene4007	2	gene22306|gene4007	2	--	0
brush border membrane	CC	GO:0031526	0.00367334	0.0378637	--	40	gene1052|gene4010	2	--	0	gene4010|gene1052	2
GO classification of differentially expressed mRNAs between Birth and E120d
Term_name		Accession	p-value	FDR	Alt_id	Background_Count	DE_Gene	DE_Count	Up_Gene	Up_Count	Down_Gene	Down_Count
peptide cross-linking	BP	GO:0018149	1.68351e-07	0.000457242	--	30	gene16945|gene16946|gene1250|gene1240|gene1263|gene21789|gene21790	7	gene16945|gene16946|gene1263|gene21789|gene21790|gene1250|gene1240	7	--	0
epidermis development	BP	GO:0008544	8.9735e-07	0.0012186	--	54	gene5315|gene1240|gene15074|gene21789|gene24397|gene15081|gene15312|gene18581	8	gene15312|gene15081|gene21789|gene5315|gene18581|gene24397|gene15074|gene1240	8	--	0
intermediate filament	CC	GO:0005882	1.72168e-46	5.71597e-44	--	144	gene6380|gene15049|gene15066|gene6373|gene15040|gene15041|gene15068|gene15069|gene15042|gene15046|gene6379|gene6378|gene6375|gene6376|gene6371|gene6359|gene15045|gene1704|gene1707|gene1703|gene15037|gene15039|gene15074|gene15077|gene15071|gene15070|gene15072|gene15053|gene15052|gene15051|gene15050|gene15056|gene15055|gene6368|gene6369|gene6366|gene6367|gene6363|gene1714|gene1712|gene1713|gene1229…	44	gene15051|gene15056|gene15055|gene15053|gene15052|gene15037|gene15050|gene15039|gene15074|gene2700|gene1229|gene15071|gene15070|gene15072|gene6366|gene6367|gene6363|gene6380|gene6368|gene6369|gene15081|gene1703|gene1707|gene1704|gene15045|gene15046|gene15069|gene15040|gene15041|gene15042|gene15066|gene15049|gene6373|gene6371|gene6376|gene6375|gene6379|gene6378|gene15068|gene1714|gene1712|gene1713	42	gene15077|gene6359	2
keratin filament	CC	GO:0045095	3.35704e-31	5.57268e-29	--	66	gene6380|gene15049|gene15066|gene6359|gene15068|gene6379|gene6378|gene6375|gene6376|gene6371|gene6373|gene15077|gene2700|gene15053|gene15052|gene15051|gene15050|gene15056|gene15055|gene6368|gene6369|gene6366|gene6367|gene6363|gene1714|gene15081	26	gene15056|gene15055|gene15053|gene15052|gene15051|gene15050|gene2700|gene6366|gene6367|gene6363|gene6380|gene6368|gene6369|gene15081|gene15068|gene15066|gene15049|gene6373|gene6371|gene6376|gene6375|gene6379|gene6378|gene1714	24	gene15077|gene6359	2
polymeric cytoskeletal fiber	CC	GO:0099513	3.97214e-24	4.39584e-22	--	655	gene6380|gene2512|gene12719|gene4136|gene28233|gene15049|gene15066|gene6373|gene28234|gene15040|gene15041|gene15068|gene15069|gene15045|gene15046|gene6379|gene6378|gene6375|gene6376|gene6371|gene6359|gene1704|gene1707|gene1703|gene9782|gene15042|gene15037|gene15039|gene15074|gene15077|gene2700|gene15070|gene15072|gene15053|gene15052|gene15051|gene15050|gene15056|gene15055|gene6368|gene6369|gene63…	52	gene11601|gene15051|gene15056|gene15055|gene15053|gene15052|gene15037|gene15050|gene15039|gene15074|gene2700|gene1229|gene15071|gene15070|gene15072|gene6366|gene6367|gene6363|gene6380|gene6368|gene6369|gene15081|gene1703|gene1707|gene6568|gene1704|gene2512|gene15045|gene15046|gene15069|gene15040|gene15041|gene15042|gene15066|gene15049|gene6373|gene6371|gene12719|gene6376|gene6375|gene6379|gene637…	46	gene28233|gene28234|gene6359|gene9782|gene15077|gene4136	6
supramolecular polymer	CC	GO:0099081	1.23307e-22	6.82299e-21	--	706	gene6380|gene2512|gene12719|gene4136|gene28233|gene15049|gene15066|gene6373|gene28234|gene15040|gene15041|gene15068|gene15069|gene15045|gene15046|gene6379|gene6378|gene6375|gene6376|gene6371|gene6359|gene1704|gene1707|gene1703|gene9782|gene15042|gene15037|gene15039|gene15074|gene15077|gene2700|gene15070|gene15072|gene15053|gene15052|gene15051|gene15050|gene15056|gene15055|gene6368|gene6369|gene63…	52	gene11601|gene15051|gene15056|gene15055|gene15053|gene15052|gene15037|gene15050|gene15039|gene15074|gene2700|gene1229|gene15071|gene15070|gene15072|gene6366|gene6367|gene6363|gene6380|gene6368|gene6369|gene15081|gene1703|gene1707|gene6568|gene1704|gene2512|gene15045|gene15046|gene15069|gene15040|gene15041|gene15042|gene15066|gene15049|gene6373|gene6371|gene12719|gene6376|gene6375|gene6379|gene637…	46	gene28233|gene28234|gene6359|gene9782|gene15077|gene4136	6
supramolecular complex	CC	GO:0099080	1.23307e-22	6.82299e-21	--	706	gene6380|gene2512|gene12719|gene4136|gene28233|gene15049|gene15066|gene6373|gene28234|gene15040|gene15041|gene15068|gene15069|gene15045|gene15046|gene6379|gene6378|gene6375|gene6376|gene6371|gene6359|gene1704|gene1707|gene1703|gene9782|gene15042|gene15037|gene15039|gene15074|gene15077|gene2700|gene15070|gene15072|gene15053|gene15052|gene15051|gene15050|gene15056|gene15055|gene6368|gene6369|gene63…	52	gene11601|gene15051|gene15056|gene15055|gene15053|gene15052|gene15037|gene15050|gene15039|gene15074|gene2700|gene1229|gene15071|gene15070|gene15072|gene6366|gene6367|gene6363|gene6380|gene6368|gene6369|gene15081|gene1703|gene1707|gene6568|gene1704|gene2512|gene15045|gene15046|gene15069|gene15040|gene15041|gene15042|gene15066|gene15049|gene6373|gene6371|gene12719|gene6376|gene6375|gene6379|gene637…	46	gene28233|gene28234|gene6359|gene9782|gene15077|gene4136	6
supramolecular fiber	CC	GO:0099512	1.23307e-22	6.82299e-21	GO:0043205	706	gene6380|gene2512|gene12719|gene4136|gene28233|gene15049|gene15066|gene6373|gene28234|gene15040|gene15041|gene15068|gene15069|gene15045|gene15046|gene6379|gene6378|gene6375|gene6376|gene6371|gene6359|gene1704|gene1707|gene1703|gene9782|gene15042|gene15037|gene15039|gene15074|gene15077|gene2700|gene15070|gene15072|gene15053|gene15052|gene15051|gene15050|gene15056|gene15055|gene6368|gene6369|gene63…	52	gene11601|gene15051|gene15056|gene15055|gene15053|gene15052|gene15037|gene15050|gene15039|gene15074|gene2700|gene1229|gene15071|gene15070|gene15072|gene6366|gene6367|gene6363|gene6380|gene6368|gene6369|gene15081|gene1703|gene1707|gene6568|gene1704|gene2512|gene15045|gene15046|gene15069|gene15040|gene15041|gene15042|gene15066|gene15049|gene6373|gene6371|gene12719|gene6376|gene6375|gene6379|gene637…	46	gene28233|gene28234|gene6359|gene9782|gene15077|gene4136	6
cytoskeletal part	CC	GO:0044430	7.69761e-16	3.65087e-14	--	1683	gene15040|gene6380|gene12050|gene2512|gene25807|gene12719|gene11877|gene4136|gene28233|gene15049|gene15066|gene6373|gene28234|gene24912|gene11834|gene15068|gene15069|gene14356|gene11833|gene15041|gene15050|gene6379|gene6378|gene6375|gene6376|gene6371|gene6359|gene15045|gene1704|gene1707|gene6367|gene15046|gene1703|gene9782|gene10217|gene22428|gene15042|gene24430|gene15037|gene15039|gene12320|gene…	69	gene11601|gene15037|gene15056|gene15055|gene15053|gene15052|gene12050|gene15050|gene15039|gene15074|gene2700|gene1229|gene15071|gene10217|gene15072|gene6366|gene6367|gene2062|gene25373|gene6363|gene6380|gene6368|gene6369|gene15051|gene15070|gene15081|gene1703|gene6375|gene23590|gene24912|gene6568|gene1704|gene2512|gene14356|gene15068|gene15069|gene15040|gene15041|gene15042|gene6580|gene15066|gene…	59	gene28233|gene23643|gene28234|gene820|gene6359|gene22428|gene9782|gene15077|gene4136|gene11877	10
extracellular region part	CC	GO:0044421	3.43897e-09	1.42717e-07	--	3789	gene2512|gene25807|gene5679|gene4682|gene5673|gene5672|gene15624|gene1997|gene21339|gene26784|gene15039|gene3106|gene2611|gene6948|gene13458|gene12102|gene24397|gene2196|gene2869|gene7989|gene2774|gene2062|gene16216|gene24148|gene18010|gene18011|gene1233|gene23540|gene2179|gene9951|gene10385|gene17439|gene1820|gene24666|gene20287|gene20449|gene1227|gene11010|gene15081|gene7768|gene1240|gene1241|g…	96	gene10799|gene24397|gene6948|gene6602|gene3106|gene9951|gene18010|gene18011|gene15039|gene15074|gene6376|gene2062|gene17439|gene15041|gene13621|gene10066|gene1052|gene25373|gene15081|gene6368|gene24148|gene21687|gene20287|gene10838|gene17828|gene6974|gene10836|gene21508|gene2512|gene20587|gene1233|gene18047|gene6366|gene5323|gene6363|gene6367|gene5673|gene2196|gene2611|gene11010|gene28209|gene567…	61	gene1997|gene1227|gene20449|gene16216|gene8382|gene8387|gene12935|gene15077|gene3254|gene15624|gene6253|gene20592|gene2869|gene26784|gene10385|gene4682|gene10509|gene21339|gene2179|gene7989|gene29186|gene2156|gene2497|gene12102|gene10097|gene24603|gene1820|gene9399|gene23540|gene820|gene2774|gene7895|gene13458|gene20428|gene22757	35
extracellular space	CC	GO:0005615	1.18341e-07	4.36546e-06	--	1270	gene7989|gene7768|gene8382|gene5679|gene10836|gene6974|gene5673|gene5672|gene15624|gene10838|gene21508|gene24148|gene20592|gene21687|gene6602|gene26784|gene18010|gene18011|gene24430|gene6253|gene7895|gene3106|gene2179|gene2611|gene10385|gene820|gene24397|gene3254|gene25472|gene25473|gene25471|gene24666|gene20287|gene25478|gene2196|gene20587|gene18581|gene17828|gene20428|gene24603|gene11010|gene28…	43	gene11010|gene6602|gene3106|gene18010|gene18011|gene20587|gene24148|gene21687|gene20287|gene10838|gene17828|gene6974|gene10836|gene21508|gene2196|gene5673|gene5672|gene24397|gene5679|gene7768|gene25472|gene25473|gene25471|gene24666|gene25478|gene18581|gene24430|gene2611	28	gene6253|gene20592|gene24603|gene2869|gene8382|gene820|gene2179|gene7989|gene7895|gene26784|gene20428|gene10385|gene3254|gene15624|gene13458	15
cornified envelope	CC	GO:0001533	4.8348e-07	1.60515e-05	--	22	gene1250|gene1240|gene1263|gene1227|gene24397|gene1231	6	gene1250|gene1240|gene1263|gene1231|gene24397	5	gene1227	1
extracellular matrix	CC	GO:0031012	7.19201e-05	0.00217068	--	403	gene22757|gene2774|gene29186|gene10509|gene2869|gene9399|gene12935|gene21687|gene10799|gene20592|gene4682|gene6948|gene21339|gene13458|gene6253|gene1227|gene15624	17	gene10799|gene6948|gene21687	3	gene4682|gene20592|gene9399|gene10509|gene21339|gene2869|gene2774|gene12935|gene6253|gene13458|gene29186|gene22757|gene15624|gene1227	14
proteinaceous extracellular matrix	CC	GO:0005578	0.000116684	0.00322824	--	265	gene2774|gene6253|gene10509|gene15624|gene9399|gene12935|gene10799|gene4682|gene21339|gene13458|gene22757|gene1227|gene2869	13	gene10799	1	gene6253|gene9399|gene10509|gene21339|gene2869|gene2774|gene4682|gene13458|gene12935|gene22757|gene15624|gene1227	12
collagen trimer	CC	GO:0005581	0.000415455	0.0106101	--	95	gene2774|gene22757|gene2179|gene4682|gene13458|gene20428|gene10385	7	--	0	gene4682|gene2774|gene2179|gene13458|gene20428|gene10385|gene22757	7
extracellular exosome	CC	GO:0070062	0.000676661	0.0159942	--	2558	gene7768|gene820|gene2512|gene25807|gene1240|gene1241|gene2062|gene15041|gene8387|gene11449|gene16216|gene1997|gene6376|gene6371|gene6373|gene13621|gene6602|gene5323|gene21508|gene6051|gene1233|gene10097|gene23540|gene15039|gene12320|gene2179|gene2611|gene9951|gene15077|gene12102|gene2133|gene17439|gene24397|gene1820|gene3254|gene15074|gene10066|gene18047|gene28209|gene25472|gene25473|gene6368|ge…	56	gene10066|gene9951|gene15039|gene15074|gene2062|gene17439|gene6366|gene13621|gene1052|gene25373|gene6051|gene25473|gene6368|gene6602|gene15081|gene20287|gene21508|gene2512|gene1233|gene18047|gene5323|gene6367|gene15041|gene24397|gene28209|gene7768|gene6373|gene6371|gene25472|gene6376|gene2133|gene25471|gene12320|gene6363|gene20587|gene25807|gene11449|gene6369|gene1240|gene1241|gene2611	41	gene10097|gene24603|gene1820|gene1997|gene23540|gene20449|gene16216|gene2179|gene820|gene20428|gene8387|gene15077|gene3254|gene2497|gene12102	15
extracellular organelle	CC	GO:0043230	0.000770804	0.0159942	--	2572	gene7768|gene820|gene2512|gene25807|gene1240|gene1241|gene2062|gene15041|gene8387|gene11449|gene16216|gene1997|gene6376|gene6371|gene6373|gene13621|gene6602|gene5323|gene21508|gene6051|gene1233|gene10097|gene23540|gene15039|gene12320|gene2179|gene2611|gene9951|gene15077|gene12102|gene2133|gene17439|gene24397|gene1820|gene3254|gene15074|gene10066|gene18047|gene28209|gene25472|gene25473|gene6368|ge…	56	gene10066|gene9951|gene15039|gene15074|gene2062|gene17439|gene6366|gene13621|gene1052|gene25373|gene6051|gene25473|gene6368|gene6602|gene15081|gene20287|gene21508|gene2512|gene1233|gene18047|gene5323|gene6367|gene15041|gene24397|gene28209|gene7768|gene6373|gene6371|gene25472|gene6376|gene2133|gene25471|gene12320|gene6363|gene20587|gene25807|gene11449|gene6369|gene1240|gene1241|gene2611	41	gene10097|gene24603|gene1820|gene1997|gene23540|gene20449|gene16216|gene2179|gene820|gene20428|gene8387|gene15077|gene3254|gene2497|gene12102	15
extracellular vesicle	CC	GO:1903561	0.00076371	0.0159942	--	2571	gene7768|gene820|gene2512|gene25807|gene1240|gene1241|gene2062|gene15041|gene8387|gene11449|gene16216|gene1997|gene6376|gene6371|gene6373|gene13621|gene6602|gene5323|gene21508|gene6051|gene1233|gene10097|gene23540|gene15039|gene12320|gene2179|gene2611|gene9951|gene15077|gene12102|gene2133|gene17439|gene24397|gene1820|gene3254|gene15074|gene10066|gene18047|gene28209|gene25472|gene25473|gene6368|ge…	56	gene10066|gene9951|gene15039|gene15074|gene2062|gene17439|gene6366|gene13621|gene1052|gene25373|gene6051|gene25473|gene6368|gene6602|gene15081|gene20287|gene21508|gene2512|gene1233|gene18047|gene5323|gene6367|gene15041|gene24397|gene28209|gene7768|gene6373|gene6371|gene25472|gene6376|gene2133|gene25471|gene12320|gene6363|gene20587|gene25807|gene11449|gene6369|gene1240|gene1241|gene2611	41	gene10097|gene24603|gene1820|gene1997|gene23540|gene20449|gene16216|gene2179|gene820|gene20428|gene8387|gene15077|gene3254|gene2497|gene12102	15
lamellar body	CC	GO:0042599	0.000920436	0.0179756	--	14	gene4441|gene21508|gene18581	3	gene21508|gene18581|gene4441	3	--	0
epidermal lamellar body	CC	GO:0097209	0.00195562	0.0360703	--	5	gene4441|gene18581	2	gene18581|gene4441	2	--	0
structural molecule activity	MF	GO:0005198	8.3209e-08	5.1756e-05	--	1439	gene6380|gene25807|gene12719|gene1240|gene15049|gene10799|gene15040|gene15041|gene15042|gene15069|gene15045|gene15046|gene6379|gene6378|gene10509|gene6375|gene6376|gene6371|gene20587|gene6359|gene6367|gene6373|gene1233|gene1768|gene24430|gene15037|gene15039|gene1250|gene15074|gene6948|gene15071|gene15070|gene15072|gene27733|gene15051|gene15050|gene6368|gene6369|gene6366|gene27311|gene6363|gene126…	47	gene10799|gene1263|gene15051|gene6948|gene15037|gene15050|gene15039|gene15074|gene1229|gene15071|gene15070|gene15072|gene1768|gene6366|gene6367|gene6363|gene6380|gene6368|gene6369|gene27733|gene1250|gene15081|gene1233|gene27311|gene15045|gene15046|gene15069|gene15040|gene15041|gene15042|gene15049|gene6373|gene6371|gene12719|gene6376|gene6375|gene6379|gene6378|gene20587|gene25807|gene1714|gene1715…	44	gene15077|gene10509|gene6359	3
transferase activity, transferring amino-acyl groups	MF	GO:0016755	1.49908e-06	0.000466215	--	15	gene8084|gene16945|gene16946|gene21789|gene21790	5	gene16945|gene16946|gene21789|gene21790|gene8084	5	--	0
protein-glutamine gamma-glutamyltransferase activity	MF	GO:0003810	4.76227e-06	0.000987376	--	9	gene16945|gene16946|gene21789|gene21790	4	gene16945|gene16946|gene21790|gene21789	4	--	0
transferase activity, transferring acyl groups	MF	GO:0016746	6.76039e-05	0.0105124	GO:0008415	251	gene24804|gene16945|gene16946|gene2357|gene8084|gene12337|gene20585|gene21789|gene20273|gene16238|gene27684|gene19680|gene21790	13	gene16945|gene16946|gene21790|gene16238|gene20585|gene12337|gene19680|gene20273|gene2357|gene21789|gene27684|gene24804|gene8084	13	--	0
3-oxo-arachidoyl-CoA synthase activity	MF	GO:0102336	0.00022392	0.0174098	--	9	gene12337|gene24804|gene20273	3	gene24804|gene12337|gene20273	3	--	0
3-oxo-lignoceronyl-CoA synthase activity	MF	GO:0102338	0.00022392	0.0174098	--	9	gene12337|gene24804|gene20273	3	gene24804|gene12337|gene20273	3	--	0
3-oxo-cerotoyl-CoA synthase activity	MF	GO:0102337	0.00022392	0.0174098	--	9	gene12337|gene24804|gene20273	3	gene24804|gene12337|gene20273	3	--	0
fatty acid elongase activity	MF	GO:0009922	0.00022392	0.0174098	--	9	gene12337|gene24804|gene20273	3	gene24804|gene12337|gene20273	3	--	0
interleukin-1 receptor binding	MF	GO:0005149	0.000430645	0.0297623	--	11	gene5679|gene5673|gene5672	3	gene5673|gene5672|gene5679	3	--	0
GO classification of differentially expressed mRNAs between E120d and E90d
Term_name		Accession	p-value	FDR	Alt_id	Background_Count	DE_Gene	DE_Count	Up_Gene	Up_Count	Down_Gene	Down_Count
biological adhesion	BP	GO:0022610	2.87613e-12	6.95303e-09	--	845	gene25292|gene10508|gene12935|gene1715|gene2133|gene2774|gene19|gene26880|gene15895|gene23182|gene10153|gene3543|gene3528|gene7984|gene4572|gene819|gene13200|gene6911|gene12459|gene14730|gene705|gene24698|gene2551|gene27083|gene27227|gene24111|gene15909|gene7357|gene12974|gene2869|gene2092|gene1759|gene18314|gene24078|gene12870|gene17898|gene22125|gene19221|gene25290|gene13935|gene20444|gene12928…	78	gene24111|gene19244|gene3528|gene2869|gene28377|gene3543|gene22288|gene820|gene29186|gene13935|gene24078|gene27227|gene20702|gene11802|gene12459|gene13200|gene10508|gene10187|gene1783|gene819|gene25290|gene25007|gene2092|gene26609|gene25269|gene14730|gene5772|gene15895|gene4445|gene2774|gene19061|gene22125|gene12974|gene20449|gene26880|gene23778|gene6911|gene10153|gene25292|gene11263|gene12935	41	gene12870|gene510|gene12735|gene19221|gene14088|gene15909|gene1759|gene25203|gene4572|gene12928|gene7357|gene26519|gene7984|gene705|gene10066|gene25204|gene23182|gene25202|gene25201|gene25200|gene2133|gene24698|gene19125|gene15897|gene19|gene1868|gene17771|gene18314|gene1715|gene11882|gene9105|gene2551|gene12670|gene27083|gene17898|gene20444|gene7856	37
cell adhesion	BP	GO:0007155	2.76868e-12	6.95303e-09	GO:0098602	828	gene22125|gene10508|gene12935|gene1715|gene2774|gene19|gene15897|gene15895|gene23182|gene10153|gene3528|gene3543|gene20444|gene7984|gene4572|gene4445|gene819|gene13200|gene6911|gene12459|gene14730|gene705|gene7357|gene2551|gene27083|gene27227|gene24111|gene15909|gene12870|gene12974|gene2869|gene2092|gene1759|gene18314|gene24078|gene17898|gene25292|gene19221|gene25290|gene13935|gene5772|gene12928|…	77	gene24111|gene19244|gene3528|gene2869|gene28377|gene3543|gene22288|gene820|gene29186|gene13935|gene24078|gene27227|gene20702|gene11802|gene12459|gene13200|gene10508|gene10187|gene1783|gene819|gene10153|gene25007|gene2092|gene26609|gene25269|gene14730|gene5772|gene15895|gene4445|gene2774|gene19061|gene22125|gene12974|gene20449|gene26880|gene23778|gene6911|gene25290|gene25292|gene11263|gene12935	41	gene12870|gene510|gene12670|gene19221|gene14088|gene15909|gene1759|gene25203|gene4572|gene12928|gene7357|gene26519|gene7984|gene705|gene10066|gene25204|gene23182|gene25202|gene25201|gene25200|gene24698|gene19125|gene15897|gene19|gene1868|gene17771|gene18314|gene1715|gene11882|gene9105|gene2551|gene12735|gene27083|gene17898|gene20444|gene7856	36
cellular component assembly involved in morphogenesis	BP	GO:0010927	1.15952e-10	1.86876e-07	--	53	gene4007|gene1185|gene14730|gene13389|gene26667|gene4813|gene3903|gene11877|gene11876|gene23925|gene15000|gene25807|gene10351|gene22306|gene10319|gene25284	16	gene3903|gene4007|gene1185|gene10319|gene26667|gene10351|gene22306|gene15000|gene23925|gene25284|gene11877|gene14730	12	gene13389|gene25807|gene11876|gene4813	4
muscle system process	BP	GO:0003012	2.15653e-10	2.6067e-07	--	173	gene1185|gene15897|gene23925|gene15000|gene14749|gene4007|gene25271|gene7761|gene24698|gene26837|gene20279|gene3829|gene11877|gene11876|gene10313|gene3903|gene9783|gene25807|gene18550|gene4423|gene14753|gene27320|gene2062|gene24528|gene13318|gene22428|gene18498|gene22306	28	gene13318|gene22428|gene25271|gene11877|gene14749|gene4007|gene23925|gene27320|gene22306|gene10313|gene1185|gene3903|gene24528|gene4423|gene9783|gene18498|gene20279|gene26837|gene14753|gene15000|gene3829|gene7761	22	gene11876|gene15897|gene25807|gene24698|gene2062|gene18550	6
muscle contraction	BP	GO:0006936	2.73606e-10	2.64577e-07	--	141	gene1185|gene15897|gene23925|gene15000|gene14749|gene4007|gene25271|gene26837|gene20279|gene24698|gene11877|gene11876|gene3903|gene9783|gene25807|gene18550|gene4423|gene14753|gene27320|gene2062|gene24528|gene13318|gene22428|gene18498|gene22306	25	gene3903|gene22306|gene14749|gene4007|gene23925|gene13318|gene4423|gene14753|gene24528|gene11877|gene26837|gene9783|gene22428|gene15000|gene25271|gene27320|gene1185|gene18498|gene20279	19	gene11876|gene15897|gene25807|gene24698|gene2062|gene18550	6
myofibril assembly	BP	GO:0030239	6.19073e-09	4.98869e-06	--	29	gene4007|gene1185|gene14730|gene26667|gene3903|gene11877|gene11876|gene23925|gene15000|gene22306|gene10319	11	gene3903|gene4007|gene1185|gene10319|gene26667|gene22306|gene15000|gene23925|gene11877|gene14730	10	gene11876	1
extracellular matrix organization	BP	GO:0030198	4.2364e-08	2.92614e-05	--	218	gene3330|gene4445|gene15895|gene11962|gene12459|gene4572|gene13200|gene11287|gene17572|gene27227|gene20147|gene12974|gene2869|gene18581|gene22125|gene25290|gene25807|gene820|gene11263|gene15761|gene7856|gene26609|gene1868|gene1961|gene13318|gene25471|gene1881|gene9403	28	gene12459|gene4445|gene1881|gene3330|gene22125|gene12974|gene13318|gene13200|gene2869|gene11263|gene15895|gene20147|gene15761|gene1961|gene9403|gene11287|gene27227|gene820|gene26609|gene25290	20	gene1868|gene11962|gene17572|gene4572|gene25471|gene25807|gene18581|gene7856	8
extracellular structure organization	BP	GO:0043062	5.16283e-08	3.12028e-05	--	220	gene3330|gene15895|gene11962|gene12459|gene4572|gene13200|gene11287|gene17572|gene27227|gene20147|gene12974|gene2869|gene18581|gene22125|gene25290|gene25807|gene820|gene1961|gene11263|gene15761|gene7856|gene26609|gene1868|gene4445|gene13318|gene25471|gene1881|gene9403	28	gene12459|gene13200|gene1881|gene3330|gene22125|gene12974|gene13318|gene4445|gene2869|gene11263|gene15895|gene20147|gene15761|gene1961|gene9403|gene11287|gene27227|gene820|gene26609|gene25290	20	gene1868|gene11962|gene17572|gene4572|gene25471|gene25807|gene18581|gene7856	8
developmental process	BP	GO:0032502	7.00255e-08	3.76193e-05	GO:0044767	4539	gene20592|gene22130|gene3330|gene2290|gene8419|gene1240|gene16693|gene6359|gene6946|gene10972|gene10508|gene23925|gene15000|gene11962|gene13200|gene23643|gene11918|gene7936|gene6628|gene12401|gene11877|gene16216|gene7357|gene1612|gene10351|gene22428|gene11853|gene9782|gene19770|gene12525|gene1250|gene8893|gene8645|gene10666|gene12928|gene15081|gene13389|gene18550|gene3075|gene10187|gene25807|gene…	244	gene11918|gene4023|gene8382|gene23925|gene848|gene5452|gene12425|gene21678|gene20279|gene1610|gene1612|gene14927|gene9782|gene20147|gene3472|gene26609|gene4117|gene13515|gene14753|gene19201|gene3194|gene13318|gene2869|gene10508|gene22288|gene17964|gene11877|gene3075|gene820|gene359|gene10351|gene24078|gene7849|gene27227|gene14111|gene25284|gene1185|gene20702|gene6062|gene3903|gene15918|gene2179|g…	106	gene6151|gene12735|gene3715|gene12525|gene1759|gene20170|gene12050|gene7266|gene5516|gene12401|gene18580|gene18581|gene11853|gene9827|gene14237|gene4572|gene26519|gene4220|gene19057|gene8893|gene5513|gene11962|gene23182|gene8419|gene11633|gene25200|gene22756|gene8410|gene5951|gene2095|gene6369|gene4813|gene3221|gene25044|gene21365|gene23632|gene13389|gene10972|gene13621|gene6760|gene24430|gene255…	138
actomyosin structure organization	BP	GO:0031032	3.63757e-07	0.000175876	--	89	gene4007|gene1185|gene25284|gene24698|gene15079|gene26667|gene14753|gene3903|gene11877|gene11876|gene18550|gene23925|gene15000|gene22306|gene10319|gene14730	16	gene3903|gene4007|gene11877|gene14753|gene10319|gene26667|gene22306|gene15000|gene23925|gene25284|gene1185|gene14730	12	gene18550|gene11876|gene15079|gene24698	4
actin filament organization	BP	GO:0007015	4.98247e-07	0.000200752	--	203	gene1185|gene12870|gene16733|gene15000|gene11601|gene23643|gene7765|gene1460|gene9505|gene24698|gene11877|gene11876|gene3903|gene11198|gene2512|gene16601|gene24912|gene28211|gene26284|gene26381|gene23580|gene11459|gene19261|gene6194|gene22306	25	gene3903|gene26381|gene1185|gene23643|gene15000|gene9505|gene11877|gene7765|gene22306	9	gene6194|gene26284|gene2512|gene12870|gene19261|gene11459|gene16601|gene24912|gene11601|gene1460|gene24698|gene23580|gene28211|gene11198|gene11876|gene16733	16
supramolecular fiber organization	BP	GO:0097435	4.79213e-07	0.000200752	GO:0043206	349	gene1185|gene12870|gene16733|gene15895|gene23925|gene15000|gene11601|gene4007|gene23643|gene14730|gene7765|gene26667|gene11877|gene9505|gene24698|gene1460|gene11876|gene3903|gene10319|gene11198|gene2512|gene15761|gene16601|gene24912|gene6369|gene28211|gene333|gene15081|gene26284|gene23580|gene26381|gene11459|gene19261|gene6194|gene22306	35	gene10319|gene3903|gene26381|gene4007|gene23925|gene15761|gene15895|gene22306|gene11877|gene26667|gene7765|gene15000|gene9505|gene1185|gene23643|gene14730	16	gene6194|gene26284|gene2512|gene12870|gene15081|gene11459|gene16601|gene24912|gene19261|gene11601|gene1460|gene24698|gene23580|gene6369|gene28211|gene333|gene11198|gene11876|gene16733	19
actin filament-based process	BP	GO:0030029	5.48517e-07	0.000204006	--	351	gene1185|gene25284|gene12870|gene2296|gene16733|gene23925|gene15000|gene16241|gene14749|gene28221|gene4007|gene4023|gene14730|gene26667|gene27083|gene24698|gene11877|gene11876|gene24330|gene2512|gene3903|gene1759|gene9782|gene10319|gene25807|gene15079|gene18550|gene6911|gene14753|gene24912|gene24528|gene12320|gene4117|gene2169|gene22306	35	gene3903|gene2296|gene4117|gene14749|gene4007|gene23925|gene24528|gene26667|gene10319|gene22306|gene11877|gene28221|gene9782|gene15000|gene6911|gene4023|gene25284|gene1185|gene14753|gene14730	20	gene2512|gene12870|gene24912|gene15079|gene24698|gene1759|gene2169|gene16241|gene12320|gene27083|gene25807|gene24330|gene11876|gene16733|gene18550	15
striated muscle contraction	BP	GO:0006941	6.9336e-06	0.00223493	--	54	gene4007|gene14753|gene22428|gene18550|gene15897|gene3903|gene27320|gene23925|gene15000|gene24528|gene14749	11	gene3903|gene14749|gene4007|gene23925|gene24528|gene22428|gene27320|gene14753|gene15000	9	gene15897|gene18550	2
regulation of cell proliferation	BP	GO:0042127	6.55489e-06	0.00223493	--	1363	gene21868|gene22130|gene8419|gene16693|gene6359|gene11962|gene27265|gene6628|gene12401|gene14025|gene7357|gene12722|gene24078|gene12525|gene10666|gene16337|gene3472|gene8002|gene1395|gene11459|gene2169|gene6194|gene22300|gene510|gene14688|gene21678|gene28181|gene851|gene10838|gene13941|gene6370|gene21508|gene6760|gene1460|gene454|gene2179|gene5944|gene15761|gene13318|gene1174|gene20170|gene15918|…	87	gene6359|gene2869|gene3472|gene28308|gene1395|gene7001|gene820|gene4007|gene27553|gene21678|gene1610|gene14111|gene8382|gene21868|gene16693|gene15918|gene8002|gene24078|gene2179|gene15895|gene10175|gene2156|gene13318|gene10313|gene4445|gene7849|gene6628|gene15761|gene7918|gene25292|gene10367|gene16337	32	gene6151|gene510|gene21508|gene4885|gene2122|gene12525|gene1460|gene1174|gene4284|gene20170|gene10666|gene12401|gene19698|gene28181|gene5802|gene6370|gene781|gene6194|gene22130|gene4572|gene7357|gene4765|gene21704|gene22300|gene6371|gene14276|gene14688|gene10065|gene11962|gene8419|gene23632|gene25447|gene27265|gene5944|gene21724|gene15563|gene2095|gene10836|gene10838|gene2566|gene3221|gene657|gen…	55
keratinization	BP	GO:0031424	8.82517e-06	0.00250998	--	28	gene1250|gene8893|gene25717|gene16946|gene1248|gene1231|gene4765|gene4441	8	--	0	gene16946|gene4441|gene25717|gene4765|gene1231|gene1248|gene1250|gene8893	8
anatomical structure morphogenesis	BP	GO:0009653	8.40992e-06	0.00250998	--	1192	gene10385|gene21826|gene3330|gene28221|gene1610|gene7895|gene15761|gene3164|gene16693|gene15563|gene24430|gene23182|gene15000|gene6062|gene10175|gene11601|gene4445|gene6371|gene14927|gene3293|gene21508|gene7849|gene23643|gene6602|gene11388|gene25471|gene27083|gene4220|gene12401|gene15918|gene16216|gene24397|gene13804|gene2869|gene5951|gene3903|gene9403|gene22428|gene24078|gene19261|gene6323|gene8…	78	gene11388|gene10385|gene2869|gene19225|gene4023|gene7895|gene1017|gene1395|gene15077|gene28047|gene7001|gene3330|gene848|gene8002|gene7849|gene21826|gene25284|gene23643|gene6062|gene3903|gene16693|gene15918|gene1610|gene24078|gene14927|gene28221|gene22428|gene9403|gene26609|gene4445|gene13804|gene14753|gene15761|gene26880|gene15000|gene10175|gene10367|gene16216|gene9782	39	gene8645|gene19261|gene510|gene12735|gene10799|gene11601|gene20170|gene2169|gene12401|gene13270|gene3293|gene2062|gene6371|gene13913|gene27096|gene17572|gene12525|gene26519|gene4220|gene14402|gene18550|gene6323|gene23182|gene8419|gene24397|gene3164|gene5951|gene15563|gene6369|gene10838|gene1868|gene4250|gene24912|gene21508|gene6602|gene25471|gene24430|gene27083|gene23632	39
muscle filament sliding	BP	GO:0030049	1.37588e-05	0.00308808	--	15	gene6911|gene4117|gene14753|gene3903|gene24528|gene14749	6	gene3903|gene4117|gene14749|gene24528|gene14753|gene6911	6	--	0
tissue development	BP	GO:0009888	1.25425e-05	0.00308808	--	489	gene1240|gene27324|gene10508|gene10175|gene15074|gene5315|gene22642|gene8002|gene6760|gene21789|gene3715|gene12401|gene24397|gene1203|gene20147|gene7936|gene12974|gene18580|gene18581|gene8893|gene10666|gene15081|gene18550|gene3075|gene15761|gene12425|gene1783|gene15312|gene14402|gene10799|gene7895|gene20170|gene26519|gene13270|gene8382|gene22770|gene8032|gene2122|gene10367|gene3837	40	gene3075|gene10367|gene10508|gene22770|gene8002|gene12974|gene1783|gene20147|gene15761|gene7936|gene27324|gene10175|gene8382|gene7895|gene12425	15	gene3715|gene10799|gene20170|gene12401|gene13270|gene18580|gene18581|gene15074|gene21789|gene5315|gene26519|gene3837|gene24397|gene14402|gene1240|gene18550|gene10666|gene1203|gene2122|gene22642|gene8893|gene15081|gene6760|gene8032|gene15312	25
actin-myosin filament sliding	BP	GO:0033275	1.37588e-05	0.00308808	--	15	gene6911|gene4117|gene14753|gene3903|gene24528|gene14749	6	gene3903|gene4117|gene14749|gene24528|gene14753|gene6911	6	--	0
actin filament-based movement	BP	GO:0030048	1.205e-05	0.00308808	--	47	gene6911|gene14730|gene4117|gene18550|gene14753|gene24912|gene3903|gene24528|gene12320|gene14749	10	gene3903|gene4117|gene14749|gene24528|gene14753|gene6911|gene14730	7	gene24912|gene12320|gene18550	3
cell-cell adhesion	BP	GO:0098609	1.40512e-05	0.00308808	GO:0016337	372	gene12870|gene1715|gene3528|gene819|gene23182|gene7357|gene12974|gene1759|gene820|gene17898|gene25292|gene19221|gene2551|gene20449|gene26880|gene20702|gene28377|gene10066|gene1783|gene26609|gene13935|gene26519|gene11882|gene25201|gene25200|gene25203|gene25202|gene25204|gene23778|gene9105|gene10187|gene12735|gene510	33	gene820|gene3528|gene12974|gene1783|gene13935|gene819|gene20449|gene26880|gene23778|gene10187|gene25292|gene26609|gene28377|gene20702	14	gene25204|gene23182|gene25201|gene12870|gene1759|gene11882|gene2551|gene19221|gene12735|gene7357|gene510|gene1715|gene26519|gene25203|gene25200|gene17898|gene9105|gene10066|gene25202	19
actin-mediated cell contraction	BP	GO:0070252	1.48483e-05	0.00312098	--	22	gene6911|gene4117|gene14753|gene24912|gene3903|gene24528|gene14749	7	gene3903|gene4117|gene14749|gene24528|gene14753|gene6911	6	gene24912	1
peptide cross-linking	BP	GO:0018149	1.54919e-05	0.00312098	--	30	gene1250|gene16945|gene16946|gene1263|gene21789|gene1240|gene21790|gene4445	8	gene4445	1	gene16946|gene16945|gene21789|gene21790|gene1263|gene1250|gene1240	7
cranial suture morphogenesis	BP	GO:0060363	2.03013e-05	0.00392627	--	10	gene20170|gene15761|gene4220|gene8645|gene7849	5	gene15761|gene7849	2	gene20170|gene8645|gene4220	3
cardiac muscle fiber development	BP	GO:0048739	3.40311e-05	0.00567381	--	6	gene3903|gene15000|gene25807|gene1759	4	gene3903|gene15000	2	gene1759|gene25807	2
pointed-end actin filament capping	BP	GO:0051694	3.40311e-05	0.00567381	--	6	gene11877|gene11876|gene1185|gene22306	4	gene1185|gene11877|gene22306	3	gene11876	1
nucleobase catabolic process	BP	GO:0046113	3.40311e-05	0.00567381	--	6	gene5939|gene792|gene4319|gene4321	4	--	0	gene4321|gene792|gene5939|gene4319	4
regulation of monocyte chemotactic protein-1 production	BP	GO:0071637	3.40311e-05	0.00567381	--	6	gene2179|gene20428|gene7849|gene2122	4	gene20428|gene2179|gene7849	3	gene2122	1
multicellular organismal process	BP	GO:0032501	3.71545e-05	0.00598807	GO:0044707|GO:0050874	3291	gene20592|gene1248|gene8419|gene16693|gene2196|gene8391|gene10972|gene10508|gene23925|gene15000|gene13200|gene25271|gene6628|gene25373|gene12401|gene21687|gene3829|gene1612|gene19274|gene10351|gene11853|gene24078|gene12525|gene1250|gene8893|gene25807|gene18550|gene4423|gene10065|gene6369|gene26772|gene22428|gene16655|gene15081|gene25717|gene24666|gene18498|gene10187|gene13270|gene25419|gene22306|…	173	gene14870|gene11388|gene8071|gene10368|gene7837|gene11607|gene13318|gene22428|gene19225|gene12370|gene25271|gene3903|gene28308|gene17964|gene11877|gene27553|gene8387|gene3194|gene28047|gene7001|gene14749|gene4007|gene23925|gene12962|gene13058|gene15761|gene27320|gene20956|gene10351|gene22306|gene26381|gene24078|gene27227|gene21826|gene10313|gene20279|gene9783|gene13200|gene10508|gene16693|gene793…	77	gene6151|gene3715|gene24002|gene12525|gene21365|gene20170|gene5516|gene12401|gene18580|gene5513|gene11853|gene4572|gene26519|gene8893|gene19274|gene8419|gene11633|gene25200|gene22756|gene5951|gene23580|gene6369|gene8391|gene19680|gene28689|gene10972|gene24430|gene25592|gene510|gene11876|gene13913|gene4765|gene24630|gene16241|gene20256|gene19769|gene3164|gene24698|gene15563|gene4070|gene10752|gene…	96
actin cytoskeleton organization	BP	GO:0030036	4.47535e-05	0.00636421	--	310	gene1185|gene25284|gene12870|gene2296|gene23925|gene15000|gene16241|gene28221|gene4007|gene4023|gene14730|gene26667|gene27083|gene24698|gene11877|gene11876|gene24330|gene2512|gene3903|gene1759|gene9782|gene10319|gene25807|gene15079|gene18550|gene14753|gene2169|gene22306	28	gene3903|gene2296|gene4007|gene23925|gene26667|gene10319|gene22306|gene11877|gene28221|gene9782|gene15000|gene4023|gene25284|gene1185|gene14753|gene14730	16	gene2512|gene12870|gene15079|gene24698|gene1759|gene2169|gene16241|gene27083|gene25807|gene24330|gene11876|gene18550	12
epidermis development	BP	GO:0008544	4.33663e-05	0.00636421	--	54	gene5315|gene8893|gene15074|gene15081|gene21789|gene1240|gene24397|gene15312|gene14402|gene18581	10	--	0	gene15074|gene21789|gene5315|gene14402|gene15081|gene24397|gene8893|gene15312|gene18581|gene1240	10
cellular developmental process	BP	GO:0048869	4.46243e-05	0.00636421	--	2546	gene20592|gene8419|gene1240|gene6359|gene2190|gene15000|gene11962|gene13200|gene23643|gene11918|gene6628|gene12401|gene7357|gene11853|gene9782|gene19770|gene12525|gene1250|gene25807|gene10666|gene12928|gene15081|gene18550|gene10065|gene24868|gene3472|gene15312|gene8002|gene1395|gene14237|gene11459|gene2169|gene12710|gene13270|gene25419|gene12393|gene22300|gene16887|gene6041|gene28221|gene1263|gen…	139	gene12974|gene3528|gene27813|gene11918|gene2869|gene19225|gene20147|gene27227|gene13569|gene7895|gene5452|gene1395|gene1997|gene12764|gene7001|gene820|gene359|gene4007|gene848|gene13058|gene15761|gene8002|gene24078|gene701|gene20428|gene25284|gene20279|gene7918|gene23643|gene13200|gene3903|gene26381|gene28047|gene15918|gene6359|gene1612|gene2179|gene14927|gene28221|gene9782|gene10385|gene1783|gen…	58	gene6151|gene25592|gene12870|gene7266|gene3715|gene12525|gene1231|gene1759|gene1474|gene10666|gene12050|gene1263|gene16067|gene5516|gene4082|gene12401|gene13270|gene6373|gene11876|gene11853|gene1229|gene25472|gene14237|gene4448|gene11459|gene12928|gene7357|gene15079|gene4765|gene12393|gene22300|gene16241|gene6371|gene19769|gene8032|gene19057|gene14402|gene10065|gene18550|gene13285|gene11962|gene2…	81
lipid metabolic process	BP	GO:0006629	4.09864e-05	0.00636421	--	1087	gene4546|gene2357|gene11160|gene13280|gene22130|gene15290|gene14688|gene8387|gene21572|gene21678|gene13252|gene4885|gene24628|gene28503|gene2190|gene371|gene7198|gene6725|gene24876|gene20273|gene16238|gene20574|gene12337|gene4220|gene28689|gene13389|gene2179|gene1610|gene9402|gene20585|gene5423|gene1946|gene8645|gene2551|gene5425|gene24804|gene19680|gene12198|gene7856|gene10929|gene3417|gene24616…	70	gene8107|gene1610|gene2190|gene2179|gene634|gene21678|gene360|gene8387	8	gene15290|gene8645|gene2357|gene6725|gene4885|gene2122|gene4250|gene2196|gene298|gene7081|gene13252|gene25852|gene24876|gene21572|gene24630|gene22130|gene25419|gene12337|gene10929|gene5423|gene19698|gene24628|gene20585|gene3833|gene16854|gene371|gene20273|gene4220|gene11160|gene14688|gene22205|gene16818|gene7611|gene7198|gene27684|gene27683|gene4546|gene5480|gene1946|gene2551|gene9402|gene24616|g…	62
skeletal muscle myosin thick filament assembly	BP	GO:0030241	6.14242e-05	0.00761502	--	3	gene15000|gene3903|gene25807	3	gene3903|gene15000	2	gene25807	1
detection of muscle stretch	BP	GO:0035995	6.14242e-05	0.00761502	--	3	gene15000|gene3903|gene23925	3	gene23925|gene3903|gene15000	3	--	0
xanthine metabolic process	BP	GO:0046110	6.14242e-05	0.00761502	--	3	gene5939|gene4319|gene4321	3	--	0	gene4321|gene5939|gene4319	3
striated muscle myosin thick filament assembly	BP	GO:0071688	6.14242e-05	0.00761502	--	3	gene3903|gene15000|gene25807	3	gene3903|gene15000	2	gene25807	1
xanthine catabolic process	BP	GO:0009115	6.14242e-05	0.00761502	--	3	gene5939|gene4319|gene4321	3	--	0	gene4321|gene5939|gene4319	3
cell-cell adhesion via plasma-membrane adhesion molecules	BP	GO:0098742	6.73695e-05	0.00814329	--	190	gene25292|gene26519|gene3528|gene2551|gene25201|gene1715|gene820|gene25202|gene20702|gene23778|gene26880|gene28377|gene25204|gene1783|gene17898|gene20449|gene1759|gene25200|gene25203|gene13935	20	gene820|gene3528|gene1783|gene13935|gene20449|gene28377|gene26880|gene23778|gene25292|gene20702	10	gene25204|gene25203|gene25202|gene25201|gene1759|gene2551|gene25200|gene1715|gene26519|gene17898	10
purine-containing compound catabolic process	BP	GO:0072523	7.03137e-05	0.00829187	--	57	gene672|gene4321|gene19238|gene8071|gene20279|gene10313|gene4319|gene19274|gene5939|gene10036	10	gene19238|gene10313|gene8071|gene20279	4	gene19274|gene672|gene10036|gene4321|gene5939|gene4319	6
skeletal muscle contraction	BP	GO:0003009	8.99176e-05	0.0103512	--	20	gene22428|gene18550|gene14753|gene15000|gene24528|gene14749	6	gene15000|gene14749|gene14753|gene22428|gene24528	5	gene18550	1
anatomical structure formation involved in morphogenesis	BP	GO:0048646	0.000110066	0.0123761	--	651	gene21826|gene1185|gene25284|gene22130|gene19238|gene12370|gene15563|gene6946|gene10836|gene23925|gene15000|gene10175|gene7849|gene851|gene4007|gene14730|gene26667|gene7357|gene11877|gene11876|gene3903|gene10351|gene24078|gene10319|gene9403|gene25292|gene25807|gene2551|gene26519|gene13389|gene4813|gene1868|gene17771|gene4445|gene25007|gene12735|gene21678|gene11809|gene20170|gene11459|gene2169|gen…	46	gene12370|gene11877|gene4007|gene23925|gene10319|gene10351|gene22306|gene21678|gene24078|gene21826|gene25284|gene1185|gene19238|gene3903|gene7849|gene25007|gene26667|gene9403|gene14730|gene4445|gene15000|gene10175|gene25292|gene10367	24	gene12735|gene20170|gene2169|gene11876|gene22130|gene7357|gene26519|gene3837|gene6946|gene11809|gene15563|gene10836|gene4813|gene1868|gene17771|gene2551|gene12670|gene851|gene11459|gene25807|gene25419|gene13389	22
anatomical structure development	BP	GO:0048856	0.000113865	0.0125122	--	2977	gene20592|gene22130|gene2290|gene8419|gene1240|gene16693|gene10972|gene10508|gene2190|gene15000|gene11962|gene13200|gene11918|gene6628|gene12401|gene11877|gene7357|gene1612|gene10351|gene9782|gene12525|gene8893|gene8645|gene10666|gene12928|gene15081|gene18550|gene3075|gene25807|gene3472|gene13935|gene8002|gene22428|gene1395|gene14237|gene11459|gene2169|gene19261|gene13270|gene25419|gene18581|gene…	156	gene15761|gene12974|gene11388|gene9403|gene11918|gene22428|gene5452|gene12425|gene4023|gene10153|gene7895|gene3903|gene8382|gene17964|gene11877|gene1395|gene3194|gene28047|gene3075|gene7001|gene1610|gene19201|gene4007|gene23925|gene13058|gene13935|gene7936|gene10351|gene27324|gene24078|gene27227|gene14111|gene20279|gene7918|gene20702|gene13200|gene26381|gene10508|gene16693|gene22770|gene15918|gen…	74	gene6151|gene16241|gene8645|gene25592|gene12870|gene19261|gene4010|gene3715|gene10799|gene12525|gene1460|gene27012|gene1759|gene20170|gene2169|gene16067|gene5516|gene4441|gene12401|gene13270|gene3293|gene18581|gene1229|gene6760|gene27096|gene15074|gene14237|gene21789|gene22130|gene5315|gene12928|gene7357|gene11876|gene1203|gene22300|gene3837|gene4220|gene9827|gene8032|gene8893|gene1240|gene18550|…	82
craniofacial suture morphogenesis	BP	GO:0097094	0.000141293	0.0151812	--	14	gene15761|gene20170|gene7849|gene8645|gene4220	5	gene15761|gene7849	2	gene20170|gene8645|gene4220	3
cardiac muscle cell development	BP	GO:0055013	0.000161759	0.0168852	--	22	gene25807|gene14730|gene3903|gene10367|gene15000|gene1759	6	gene10367|gene3903|gene15000|gene14730	4	gene1759|gene25807	2
cell junction organization	BP	GO:0034330	0.000164138	0.0168852	--	157	gene15081|gene20213|gene25284|gene12928|gene19221|gene541|gene12401|gene4023|gene15761|gene24698|gene12735|gene22756|gene11802|gene1759|gene10351|gene4445|gene28221	17	gene11802|gene4445|gene15761|gene28221|gene10351|gene4023|gene25284	7	gene20213|gene541|gene12735|gene22756|gene19221|gene12928|gene15081|gene1759|gene12401|gene24698	10
tissue morphogenesis	BP	GO:0048729	0.00017972	0.018103	--	319	gene1610|gene15563|gene15000|gene10838|gene7849|gene10175|gene6371|gene21508|gene11388|gene12401|gene2869|gene3903|gene10367|gene8002|gene4023|gene15761|gene2062|gene14402|gene7895|gene23632|gene26519|gene22428|gene13270|gene20170|gene19261|gene25471|gene510	27	gene11388|gene3903|gene4023|gene1610|gene2869|gene8002|gene7895|gene15761|gene22428|gene15000|gene7849|gene10175|gene10367	13	gene13270|gene19261|gene510|gene23632|gene21508|gene20170|gene15563|gene26519|gene25471|gene10838|gene12401|gene14402|gene2062|gene6371	14
homophilic cell adhesion via plasma membrane adhesion molecules	BP	GO:0007156	0.000203357	0.0196964	--	145	gene25292|gene26519|gene2551|gene25201|gene20449|gene26880|gene25202|gene20702|gene23778|gene28377|gene25204|gene1783|gene17898|gene25200|gene25203|gene13935	16	gene1783|gene13935|gene20449|gene26880|gene23778|gene25292|gene28377|gene20702	8	gene25204|gene25203|gene25202|gene25201|gene25200|gene2551|gene26519|gene17898	8
regulation of actin filament depolymerization	BP	GO:0030834	0.000208741	0.0196964	--	53	gene1185|gene24430|gene5837|gene23580|gene11877|gene16733|gene1460|gene11876|gene22306	9	gene11877|gene5837|gene1185|gene22306	4	gene11876|gene23580|gene1460|gene16733|gene24430	5
zymogen activation	BP	GO:0031638	0.000211573	0.0196964	--	23	gene21508|gene11388|gene23808|gene1474|gene10066|gene12735	6	gene11388	1	gene12735|gene10066|gene21508|gene1474|gene23808	5
regulation of protein depolymerization	BP	GO:1901879	0.000211833	0.0196964	--	77	gene1185|gene1395|gene5837|gene23580|gene11877|gene16733|gene1460|gene11876|gene5452|gene22306|gene24430	11	gene5837|gene1185|gene5452|gene22306|gene11877|gene1395	6	gene23580|gene24430|gene1460|gene16733|gene11876	5
regulation of multicellular organismal process	BP	GO:0051239	0.000219829	0.0200542	--	2326	gene3829|gene12935|gene2296|gene8419|gene16693|gene20956|gene1873|gene23925|gene15439|gene14531|gene4048|gene11918|gene6628|gene12401|gene2566|gene7357|gene12725|gene10351|gene24078|gene12525|gene10666|gene3075|gene3328|gene16337|gene8002|gene22428|gene18498|gene2169|gene17195|gene10185|gene22300|gene510|gene22396|gene6041|gene28221|gene6043|gene14688|gene1612|gene21678|gene6376|gene10175|gene251…	125	gene14870|gene11388|gene13569|gene12459|gene3528|gene11918|gene28933|gene22428|gene19225|gene7936|gene15439|gene7895|gene7894|gene17964|gene25290|gene16693|gene3075|gene7001|gene7765|gene1610|gene359|gene4007|gene23925|gene12962|gene5869|gene27553|gene10351|gene21678|gene24078|gene26880|gene10313|gene20279|gene19238|gene20956|gene15918|gene8002|gene1612|gene2179|gene24528|gene7136|gene7918|gene28…	62	gene16067|gene12870|gene17771|gene510|gene12670|gene2122|gene12525|gene2566|gene20170|gene2169|gene25130|gene1873|gene6376|gene12401|gene4048|gene18580|gene781|gene15076|gene13270|gene4572|gene7357|gene12725|gene22300|gene10185|gene21724|gene8032|gene7772|gene14688|gene10666|gene8419|gene11633|gene6041|gene7266|gene6043|gene11809|gene6045|gene1474|gene4765|gene15897|gene27083|gene22396|gene2095|g…	63
skeletal muscle thin filament assembly	BP	GO:0030240	0.000238441	0.0209612	--	4	gene26381|gene15000|gene3903	3	gene3903|gene15000|gene26381	3	--	0
purine nucleobase catabolic process	BP	GO:0006145	0.000238441	0.0209612	--	4	gene5939|gene4319|gene4321	3	--	0	gene4321|gene5939|gene4319	3
fatty acid elongation, monounsaturated fatty acid	BP	GO:0034625	0.000259819	0.0212919	--	9	gene24804|gene298|gene12337|gene20273	4	--	0	gene24804|gene12337|gene20273|gene298	4
fatty acid elongation, saturated fatty acid	BP	GO:0019367	0.000259819	0.0212919	--	9	gene24804|gene298|gene12337|gene20273	4	--	0	gene24804|gene12337|gene20273|gene298	4
fatty acid elongation, unsaturated fatty acid	BP	GO:0019368	0.000259819	0.0212919	--	9	gene24804|gene298|gene12337|gene20273	4	--	0	gene24804|gene12337|gene20273|gene298	4
fatty acid elongation, polyunsaturated fatty acid	BP	GO:0034626	0.000259819	0.0212919	--	9	gene24804|gene298|gene12337|gene20273	4	--	0	gene24804|gene12337|gene20273|gene298	4
peptide catabolic process	BP	GO:0043171	0.000272725	0.0219771	--	24	gene21508|gene11674|gene24666|gene25101|gene10368|gene11142	6	gene10368|gene11142	2	gene24666|gene21508|gene11674|gene25101	4
multicellular organismal macromolecule metabolic process	BP	GO:0044259	0.000321065	0.0250379	--	56	gene2156|gene3715|gene2774|gene26609|gene12974|gene1868|gene4572|gene18580|gene10385	9	gene2156|gene26609|gene2774|gene10385|gene12974	5	gene4572|gene1868|gene3715|gene18580	4
collagen metabolic process	BP	GO:0032963	0.000321065	0.0250379	--	56	gene2156|gene3715|gene2774|gene26609|gene12974|gene1868|gene4572|gene18580|gene10385	9	gene2156|gene26609|gene2774|gene10385|gene12974	5	gene4572|gene1868|gene3715|gene18580	4
cell differentiation	BP	GO:0030154	0.000369244	0.028338	--	1786	gene20592|gene8419|gene1240|gene6359|gene11962|gene13200|gene11918|gene6628|gene12401|gene7357|gene11853|gene24078|gene19770|gene12525|gene1250|gene10666|gene15081|gene10065|gene3472|gene8002|gene11459|gene2169|gene12710|gene25200|gene12393|gene22300|gene16887|gene6041|gene28221|gene1263|gene1612|gene2770|gene10175|gene6373|gene6371|gene14927|gene359|gene6760|gene1997|gene2179|gene12764|gene10719…	99	gene3528|gene6359|gene2869|gene19225|gene27227|gene13569|gene1997|gene12764|gene820|gene359|gene4007|gene13058|gene20592|gene24078|gene8002|gene701|gene13200|gene28047|gene11918|gene1612|gene2179|gene14927|gene28221|gene27813|gene20147|gene3472|gene26609|gene4445|gene12974|gene7849|gene6628|gene15761|gene20428|gene26784|gene10175|gene10367|gene11263	37	gene6151|gene7266|gene3715|gene12525|gene1231|gene20170|gene10666|gene12050|gene16067|gene5516|gene12401|gene13270|gene6373|gene11853|gene1229|gene4448|gene11459|gene7357|gene15079|gene12393|gene1263|gene6371|gene19769|gene8032|gene19057|gene14402|gene10065|gene4082|gene11962|gene8419|gene11633|gene25200|gene6041|gene22300|gene22756|gene11809|gene6370|gene11674|gene27012|gene1474|gene15563|gene20…	62
collagen catabolic process	BP	GO:0030574	0.000394817	0.0295354	--	46	gene3715|gene2774|gene26609|gene10385|gene1868|gene4572|gene18580|gene12974	8	gene26609|gene2774|gene12974|gene10385	4	gene4572|gene1868|gene3715|gene18580	4
regulation of protein complex disassembly	BP	GO:0043244	0.000397064	0.0295354	--	96	gene25754|gene1185|gene1395|gene5837|gene23580|gene11877|gene16733|gene1460|gene11876|gene5452|gene22306|gene24430	12	gene5837|gene1185|gene5452|gene22306|gene11877|gene1395	6	gene25754|gene1460|gene23580|gene24430|gene11876|gene16733	6
adult heart development	BP	GO:0007512	0.000419497	0.0307313	--	10	gene15000|gene13270|gene12401|gene14730	4	gene15000|gene14730	2	gene12401|gene13270	2
sterol biosynthetic process	BP	GO:0016126	0.000459534	0.0326742	--	47	gene11160|gene8645|gene16854|gene20574|gene4220|gene12198|gene28503|gene13166	8	--	0	gene8645|gene13166|gene16854|gene12198|gene4220|gene11160|gene20574|gene28503	8
multicellular organismal catabolic process	BP	GO:0044243	0.000459534	0.0326742	--	47	gene3715|gene2774|gene26609|gene10385|gene1868|gene4572|gene18580|gene12974	8	gene26609|gene2774|gene12974|gene10385	4	gene4572|gene1868|gene3715|gene18580	4
cellular lipid metabolic process	BP	GO:0044255	0.000563334	0.0389103	--	840	gene4546|gene2357|gene11160|gene15290|gene14688|gene21678|gene13252|gene4885|gene28503|gene2190|gene371|gene12337|gene24876|gene20273|gene16238|gene20574|gene4220|gene28689|gene13389|gene2179|gene9402|gene20585|gene5423|gene8645|gene2551|gene5425|gene24804|gene19680|gene12198|gene7856|gene10929|gene3417|gene24616|gene25847|gene22865|gene16504|gene19698|gene360|gene7611|gene4010|gene5302|gene16854…	53	gene634|gene2190|gene2179|gene21678|gene360	5	gene15290|gene8645|gene2357|gene4885|gene298|gene19698|gene13252|gene25852|gene24876|gene10929|gene11459|gene12337|gene16504|gene5423|gene3833|gene20585|gene16854|gene371|gene20273|gene4220|gene11160|gene14688|gene22205|gene16818|gene7611|gene27684|gene4546|gene21572|gene12198|gene9402|gene24616|gene3417|gene5425|gene19680|gene28689|gene22865|gene28503|gene25847|gene16238|gene13389|gene4010|gene5…	48
cytoskeleton organization	BP	GO:0007010	0.000559294	0.0389103	--	740	gene27088|gene14682|gene1185|gene28221|gene25294|gene12870|gene11709|gene16697|gene6359|gene23925|gene15000|gene16241|gene25284|gene4007|gene359|gene4023|gene14730|gene26667|gene27083|gene17536|gene24698|gene11877|gene11876|gene24330|gene18550|gene3903|gene1759|gene9782|gene10319|gene25807|gene15077|gene28234|gene15079|gene2512|gene24995|gene14753|gene2296|gene6368|gene6369|gene333|gene15037|gene…	48	gene6359|gene28234|gene4023|gene11877|gene28221|gene15077|gene359|gene4007|gene23925|gene10319|gene14682|gene22306|gene25284|gene1185|gene11802|gene16697|gene3903|gene2296|gene11709|gene26667|gene9782|gene14730|gene14753|gene27088|gene15000	25	gene12870|gene19261|gene1759|gene2169|gene15079|gene11876|gene17536|gene15037|gene16241|gene333|gene18550|gene24698|gene6368|gene6369|gene24330|gene12719|gene2512|gene15081|gene24995|gene27083|gene25807|gene25294|gene27311	23
lipid biosynthetic process	BP	GO:0008610	0.000617564	0.0420553	--	473	gene19698|gene11160|gene1610|gene21678|gene4885|gene28503|gene24876|gene12337|gene20273|gene20574|gene4220|gene28689|gene14688|gene4546|gene298|gene8645|gene2551|gene5425|gene24804|gene19680|gene12198|gene10929|gene8387|gene25847|gene16504|gene5302|gene16854|gene13166|gene25852|gene4250|gene22205|gene11459|gene634|gene16818	34	gene1610|gene634|gene21678|gene8387	4	gene8645|gene4885|gene4250|gene298|gene19698|gene25852|gene24876|gene10929|gene11459|gene12337|gene16504|gene16854|gene20273|gene4220|gene11160|gene14688|gene22205|gene16818|gene4546|gene12198|gene5425|gene19680|gene28689|gene28503|gene13166|gene25847|gene2551|gene5302|gene24804|gene20574	30
cardiac cell development	BP	GO:0055006	0.000667042	0.0447937	--	28	gene25807|gene14730|gene3903|gene10367|gene15000|gene1759	6	gene10367|gene3903|gene15000|gene14730	4	gene1759|gene25807	2
animal organ morphogenesis	BP	GO:0009887	0.000722314	0.047841	--	403	gene21826|gene1610|gene8419|gene16693|gene23182|gene11601|gene14927|gene3293|gene7849|gene16216|gene2869|gene28047|gene9403|gene6323|gene15077|gene13913|gene26880|gene3164|gene15761|gene1868|gene14402|gene10799|gene23632|gene1017|gene13270|gene27096|gene15918|gene10367|gene12735|gene25471	30	gene15077|gene28047|gene16693|gene1017|gene15918|gene1610|gene9403|gene2869|gene14927|gene15761|gene26880|gene7849|gene21826|gene10367|gene16216	15	gene13913|gene1868|gene6323|gene23182|gene8419|gene13270|gene12735|gene23632|gene27096|gene10799|gene11601|gene3164|gene25471|gene14402|gene3293	15
intermediate filament	CC	GO:0005882	8.23036e-46	4.59254e-43	--	144	gene15071|gene15061|gene15048|gene15049|gene1229|gene1714|gene15045|gene15046|gene15069|gene15040|gene15041|gene15042|gene1713|gene6359|gene6358|gene8893|gene6379|gene6378|gene6377|gene6376|gene6375|gene6373|gene15037|gene6371|gene6370|gene1710|gene12401|gene15053|gene15068|gene15066|gene15079|gene15070|gene15059|gene15072|gene15075|gene15074|gene15077|gene15076|gene1707|gene15052|gene15051|gene1…	60	gene15077|gene6365|gene6359|gene1395	4	gene1712|gene1713|gene6358|gene1714|gene1710|gene6379|gene6378|gene6377|gene6376|gene6375|gene6373|gene12401|gene6371|gene6370|gene15076|gene15075|gene15074|gene15072|gene15071|gene15070|gene15079|gene15059|gene15037|gene15051|gene15050|gene15053|gene8893|gene15055|gene15054|gene15056|gene1229|gene6369|gene1707|gene1704|gene1703|gene6383|gene6380|gene6366|gene6367|gene15039|gene6363|gene15061|gen…	56
keratin filament	CC	GO:0045095	8.00535e-32	2.23349e-29	--	66	gene15061|gene15066|gene15049|gene1714|gene15068|gene6359|gene6358|gene6379|gene6378|gene6377|gene6376|gene6375|gene6373|gene6371|gene6370|gene15059|gene8893|gene15077|gene15053|gene15052|gene15051|gene15050|gene15056|gene15055|gene15054|gene6383|gene6380|gene6368|gene6369|gene6365|gene6366|gene6367|gene6363|gene15081|gene15067	35	gene15077|gene6365|gene6359	3	gene6358|gene1714|gene6379|gene6378|gene6377|gene6376|gene6375|gene6373|gene6371|gene6370|gene15059|gene15051|gene15050|gene15053|gene8893|gene15055|gene15054|gene15056|gene6368|gene6383|gene6380|gene6366|gene6367|gene6363|gene15061|gene15052|gene15066|gene15067|gene15068|gene15081|gene15049|gene6369	32
supramolecular complex	CC	GO:0099080	7.24291e-22	8.08309e-20	--	706	gene11359|gene6359|gene6358|gene6691|gene12401|gene9782|gene6568|gene8893|gene28234|gene4423|gene15039|gene6369|gene6365|gene6366|gene6367|gene6363|gene15081|gene1395|gene6194|gene12719|gene28221|gene6379|gene6378|gene6377|gene6376|gene6375|gene11601|gene6373|gene6371|gene6370|gene11287|gene2512|gene15059|gene15053|gene15052|gene15051|gene15050|gene15056|gene15055|gene15054|gene6383|gene6380|gene…	88	gene15077|gene1031|gene9403|gene25174|gene26381|gene6365|gene13298|gene11287|gene6359|gene5452|gene14752|gene19201|gene4423|gene28221|gene28234|gene6911|gene11359|gene6691|gene1395|gene22217|gene9782	21	gene1712|gene12870|gene1713|gene11601|gene1714|gene1710|gene6379|gene6378|gene6377|gene6376|gene6375|gene4512|gene6373|gene6568|gene6371|gene6370|gene15076|gene15075|gene6194|gene15072|gene15071|gene15070|gene15079|gene27424|gene15059|gene15037|gene28211|gene15051|gene15050|gene15039|gene8893|gene15055|gene15054|gene15056|gene12401|gene1229|gene27096|gene2915|gene6358|gene1707|gene1704|gene15074|…	67
supramolecular fiber	CC	GO:0099512	7.24291e-22	8.08309e-20	GO:0043205	706	gene11359|gene6359|gene6358|gene6691|gene12401|gene9782|gene6568|gene8893|gene28234|gene4423|gene15039|gene6369|gene6365|gene6366|gene6367|gene6363|gene15081|gene1395|gene6194|gene12719|gene28221|gene6379|gene6378|gene6377|gene6376|gene6375|gene11601|gene6373|gene6371|gene6370|gene11287|gene15052|gene15059|gene15053|gene2512|gene15051|gene15050|gene15056|gene15055|gene15054|gene6383|gene6380|gene…	88	gene15077|gene1031|gene9403|gene25174|gene26381|gene6365|gene13298|gene11287|gene6359|gene5452|gene14752|gene19201|gene4423|gene28221|gene28234|gene6911|gene11359|gene6691|gene1395|gene22217|gene9782	21	gene1712|gene12870|gene1713|gene11601|gene1714|gene1710|gene6379|gene6378|gene6377|gene6376|gene6375|gene4512|gene6373|gene6568|gene6371|gene6370|gene15076|gene15075|gene6194|gene15072|gene15071|gene15070|gene15079|gene27424|gene15059|gene15037|gene28211|gene15051|gene15050|gene15039|gene15052|gene15055|gene15054|gene15056|gene12401|gene1229|gene27096|gene2915|gene6358|gene1707|gene1704|gene15074…	67
supramolecular polymer	CC	GO:0099081	7.24291e-22	8.08309e-20	--	706	gene11359|gene6359|gene6358|gene6691|gene12401|gene9782|gene6568|gene8893|gene28234|gene4423|gene15039|gene6369|gene6365|gene6366|gene6367|gene6363|gene15081|gene1395|gene6194|gene12719|gene28221|gene6379|gene6378|gene6377|gene6376|gene6375|gene11601|gene6373|gene6371|gene6370|gene11287|gene15052|gene15059|gene15053|gene2512|gene15051|gene15050|gene15056|gene15055|gene15054|gene6383|gene6380|gene…	88	gene15077|gene1031|gene9403|gene25174|gene26381|gene6365|gene13298|gene11287|gene6359|gene5452|gene14752|gene19201|gene4423|gene28221|gene28234|gene6911|gene11359|gene6691|gene1395|gene22217|gene9782	21	gene1712|gene12870|gene1713|gene11601|gene1714|gene1710|gene6379|gene6378|gene6377|gene6376|gene6375|gene4512|gene6373|gene6568|gene6371|gene6370|gene15076|gene15075|gene6194|gene15072|gene15071|gene15070|gene15079|gene27424|gene15059|gene15037|gene28211|gene15051|gene15050|gene15039|gene15052|gene15055|gene15054|gene15056|gene12401|gene1229|gene27096|gene2915|gene6358|gene1707|gene1704|gene15074…	67
polymeric cytoskeletal fiber	CC	GO:0099513	2.06973e-19	1.92485e-17	--	655	gene1714|gene1229|gene27424|gene15066|gene15049|gene19201|gene12870|gene15045|gene15068|gene1707|gene15040|gene15059|gene15042|gene4512|gene6359|gene6358|gene15072|gene5452|gene6379|gene6378|gene6377|gene6376|gene6375|gene11601|gene6373|gene6366|gene6371|gene6370|gene1710|gene15076|gene12401|gene15053|gene2915|gene15069|gene22217|gene15048|gene15052|gene1712|gene15061|gene9782|gene15071|gene15070…	80	gene15077|gene13298|gene6359|gene5452|gene25174|gene19201|gene28221|gene9782|gene26381|gene6365|gene1395|gene22217|gene28234	13	gene1712|gene12870|gene15039|gene1713|gene11601|gene1714|gene1710|gene6379|gene6378|gene6377|gene6376|gene6375|gene6373|gene12401|gene6371|gene6370|gene15076|gene15075|gene15074|gene15072|gene15071|gene15070|gene15079|gene4512|gene15059|gene15037|gene28211|gene15051|gene15050|gene15053|gene15052|gene15055|gene15054|gene15056|gene1229|gene6369|gene27096|gene2915|gene6358|gene1707|gene6194|gene1704…	67
cytoskeletal part	CC	GO:0044430	2.78229e-18	2.21789e-16	--	1683	gene11359|gene16697|gene6359|gene6358|gene28933|gene15037|gene25271|gene6580|gene25373|gene12401|gene11877|gene10217|gene9782|gene6568|gene8893|gene25807|gene28234|gene18550|gene4423|gene15039|gene6369|gene6365|gene6366|gene6367|gene6363|gene15081|gene22428|gene1395|gene26003|gene17195|gene6194|gene6377|gene22306|gene12719|gene14682|gene28221|gene16733|gene6379|gene6378|gene28181|gene6376|gene637…	142	gene1031|gene6359|gene28933|gene22428|gene20147|gene28234|gene25271|gene11877|gene1395|gene15077|gene13298|gene820|gene26003|gene5452|gene25174|gene14682|gene22306|gene26381|gene11359|gene14111|gene20279|gene23643|gene16697|gene5837|gene3903|gene20956|gene3901|gene11709|gene12454|gene24528|gene4423|gene28221|gene9782|gene27813|gene9505|gene6365|gene14730|gene1185|gene14749|gene28176|gene26837|gen…	48	gene11876|gene23590|gene12050|gene12401|gene28211|gene15037|gene15039|gene8893|gene11601|gene23580|gene6368|gene6369|gene6366|gene6367|gene27424|gene12719|gene6363|gene10217|gene24430|gene14356|gene1460|gene6379|gene6378|gene6377|gene6376|gene6375|gene6373|gene6568|gene6371|gene6370|gene15059|gene15051|gene15050|gene15053|gene15052|gene15055|gene15054|gene16733|gene15056|gene27096|gene2915|gene24…	94
contractile fiber part	CC	GO:0044449	3.02225e-13	2.10802e-11	--	241	gene1185|gene23925|gene5452|gene28933|gene15000|gene6691|gene4007|gene25271|gene4023|gene26668|gene26667|gene26837|gene14749|gene7136|gene11877|gene11876|gene3903|gene10351|gene9783|gene9782|gene10319|gene25807|gene27088|gene15079|gene14753|gene16601|gene27320|gene20956|gene13187|gene24528|gene11833|gene22428|gene4117|gene26381|gene22756|gene26496|gene18498|gene22306	38	gene28933|gene22428|gene4023|gene25271|gene26496|gene11877|gene14749|gene4007|gene23925|gene5452|gene10319|gene27320|gene10351|gene22306|gene26381|gene1185|gene3903|gene20956|gene24528|gene7136|gene26837|gene26667|gene9783|gene9782|gene6691|gene26668|gene18498|gene4117|gene14753|gene27088|gene15000	31	gene13187|gene22756|gene11833|gene15079|gene25807|gene16601|gene11876	7
extracellular region part	CC	GO:0044421	4.85268e-13	3.00866e-11	--	3789	gene20592|gene17667|gene22130|gene25294|gene12935|gene2296|gene9951|gene2290|gene1240|gene1241|gene695|gene6358|gene8391|gene10508|gene11962|gene7198|gene1961|gene2196|gene2119|gene14284|gene25373|gene12406|gene12401|gene16216|gene2611|gene2521|gene6958|gene5939|gene120|gene11853|gene8893|gene25807|gene2869|gene8002|gene20449|gene3075|gene20287|gene3328|gene10066|gene15039|gene6369|gene869|gene63…	233	gene11388|gene13515|gene3734|gene19244|gene3528|gene9403|gene13318|gene695|gene7936|gene2179|gene28311|gene3569|gene14753|gene3115|gene7895|gene7894|gene8382|gene12406|gene7310|gene8387|gene15077|gene1997|gene3075|gene820|gene29186|gene26739|gene9399|gene15761|gene6958|gene26381|gene10187|gene701|gene12102|gene3829|gene12459|gene22757|gene10508|gene1224|gene8002|gene26784|gene12454|gene25290|gene…	73	gene3715|gene7357|gene12056|gene25130|gene13338|gene12401|gene4765|gene18580|gene8391|gene11853|gene9827|gene17828|gene4572|gene10020|gene15039|gene14688|gene5910|gene8470|gene19052|gene3385|gene11962|gene5423|gene28209|gene23580|gene2095|gene6368|gene6369|gene18986|gene6366|gene6367|gene25129|gene26284|gene13621|gene6760|gene14284|gene24430|gene572|gene2551|gene1052|gene10513|gene870|gene27007|g…	160
myosin complex	CC	GO:0016459	1.9999e-10	1.11595e-08	--	71	gene25271|gene6911|gene25807|gene11359|gene14752|gene18550|gene25373|gene26837|gene4423|gene14753|gene20956|gene14111|gene26003|gene3903|gene14356|gene12320|gene14749|gene14730	18	gene3903|gene20956|gene26003|gene25271|gene4423|gene14753|gene14752|gene26837|gene6911|gene11359|gene14111|gene14749|gene14730	13	gene25807|gene14356|gene25373|gene12320|gene18550	5
extracellular matrix	CC	GO:0031012	3.81773e-09	1.93663e-07	--	403	gene20592|gene22259|gene12935|gene2774|gene1224|gene21339|gene15895|gene10153|gene11962|gene13338|gene10799|gene11882|gene11287|gene701|gene17572|gene11388|gene21687|gene13515|gene2869|gene6958|gene2092|gene5910|gene12974|gene4445|gene9399|gene25290|gene8893|gene3569|gene3075|gene19244|gene15761|gene1868|gene29186|gene1961|gene781|gene8002|gene25269|gene1881|gene22757|gene454|gene28074|gene12670|…	43	gene11388|gene12974|gene19244|gene2869|gene3569|gene3075|gene29186|gene9399|gene15761|gene701|gene1224|gene8002|gene22757|gene15895|gene25290|gene2092|gene21339|gene9403|gene25269|gene4445|gene2774|gene28074|gene13515|gene1961|gene20592|gene6958|gene11287|gene10153|gene1881|gene22259|gene12935	31	gene781|gene1868|gene11962|gene17572|gene11882|gene12670|gene10799|gene21687|gene13338|gene5910|gene8893|gene454	12
myosin filament	CC	GO:0032982	1.67585e-08	7.79272e-07	--	25	gene25271|gene6911|gene25807|gene14730|gene18550|gene26837|gene14753|gene14752|gene14749|gene11359	10	gene14749|gene11359|gene14753|gene14752|gene26837|gene6911|gene25271|gene14730	8	gene25807|gene18550	2
proteinaceous extracellular matrix	CC	GO:0005578	7.24518e-08	3.10986e-06	--	265	gene12935|gene2774|gene3569|gene15895|gene10153|gene11962|gene13338|gene10799|gene11882|gene701|gene17572|gene1881|gene12974|gene2869|gene2092|gene5910|gene13515|gene4445|gene9399|gene25290|gene1224|gene3075|gene19244|gene21339|gene1961|gene8002|gene25269|gene22757|gene454|gene28074|gene12670	31	gene13515|gene19244|gene2869|gene3569|gene3075|gene9399|gene701|gene1224|gene8002|gene22757|gene15895|gene25290|gene2092|gene21339|gene25269|gene4445|gene2774|gene28074|gene12974|gene1961|gene10153|gene1881|gene12935	23	gene11962|gene17572|gene11882|gene12670|gene10799|gene13338|gene5910|gene454	8
myofilament	CC	GO:0036379	9.75827e-08	3.88937e-06	--	12	gene25271|gene1185|gene26381|gene11877|gene11876|gene3903|gene22306	7	gene3903|gene1185|gene22306|gene26381|gene25271|gene11877	6	gene11876	1
cytoskeleton	CC	GO:0005856	1.10012e-07	4.09245e-06	--	809	gene8415|gene14682|gene25284|gene26486|gene12870|gene14688|gene2296|gene6359|gene3472|gene23925|gene6376|gene11601|gene11607|gene4007|gene27088|gene7761|gene23643|gene25294|gene7765|gene26667|gene17536|gene19173|gene9505|gene1460|gene12816|gene12075|gene11873|gene6958|gene4117|gene10351|gene6363|gene9783|gene9782|gene10319|gene3665|gene10666|gene15077|gene15076|gene15079|gene2512|gene4287|gene111…	64	gene11607|gene6359|gene15077|gene359|gene4007|gene23925|gene10319|gene14682|gene6958|gene10351|gene25284|gene23643|gene11802|gene5837|gene2296|gene8415|gene26667|gene9783|gene9782|gene9505|gene3472|gene26668|gene4117|gene28176|gene27088|gene12816|gene7761|gene7765	28	gene12870|gene11833|gene11601|gene1460|gene4287|gene15079|gene11873|gene6376|gene18580|gene2062|gene19173|gene6194|gene14237|gene12075|gene17536|gene15032|gene12719|gene3665|gene16733|gene10666|gene15076|gene22756|gene25717|gene6363|gene11198|gene26486|gene20287|gene14688|gene2512|gene28269|gene24912|gene13047|gene6580|gene25294|gene26284|gene27311	36
extracellular exosome	CC	GO:0070062	1.44593e-07	5.04268e-06	--	2558	gene17667|gene22130|gene2296|gene9951|gene2290|gene1240|gene1241|gene695|gene6358|gene8391|gene11962|gene17572|gene2119|gene14284|gene25373|gene12401|gene16216|gene2611|gene2521|gene6958|gene120|gene11853|gene8893|gene25807|gene20449|gene20287|gene3328|gene10066|gene15039|gene6369|gene869|gene6366|gene6367|gene6363|gene15081|gene5323|gene25717|gene21210|gene870|gene4030|gene10187|gene13621|gene51…	152	gene3734|gene3528|gene695|gene28311|gene3115|gene7310|gene20449|gene15077|gene1997|gene820|gene11764|gene26381|gene10187|gene8387|gene12459|gene3903|gene2179|gene12454|gene15895|gene2092|gene1783|gene12102|gene2497|gene14730|gene4445|gene4117|gene16216|gene14753|gene3328|gene19201|gene6958|gene20428|gene2296|gene11287|gene22259	35	gene3715|gene12073|gene12056|gene1052|gene12401|gene13393|gene8391|gene11853|gene10020|gene15039|gene14688|gene8470|gene3385|gene11962|gene5423|gene28209|gene23580|gene2095|gene6368|gene6369|gene18986|gene6366|gene6367|gene25129|gene26284|gene13621|gene14284|gene572|gene10513|gene870|gene27007|gene510|gene6376|gene6373|gene18586|gene6371|gene4765|gene16241|gene6946|gene7195|gene15076|gene22880|ge…	117
apical plasma membrane	CC	GO:0016324	1.97667e-07	5.94409e-06	--	277	gene13393|gene12870|gene12401|gene2296|gene15897|gene8391|gene3543|gene22756|gene20213|gene22642|gene14284|gene6760|gene541|gene20279|gene1997|gene5951|gene10351|gene19057|gene25294|gene3410|gene11899|gene6118|gene4448|gene4445|gene21438|gene10897|gene4010|gene24430|gene6906|gene5480|gene25419	31	gene11899|gene1997|gene4445|gene10897|gene10351|gene2296|gene3543|gene20279	8	gene12870|gene6118|gene12401|gene20213|gene21438|gene13393|gene6906|gene19057|gene541|gene22756|gene5951|gene15897|gene8391|gene3410|gene22642|gene4010|gene4448|gene6760|gene14284|gene24430|gene5480|gene25419|gene25294	23
extracellular organelle	CC	GO:0043230	2.02397e-07	5.94409e-06	--	2572	gene17667|gene22130|gene2296|gene9951|gene2290|gene1240|gene1241|gene695|gene6358|gene8391|gene11962|gene17572|gene2119|gene14284|gene25373|gene12401|gene16216|gene2611|gene2521|gene6958|gene120|gene11853|gene8893|gene25807|gene20449|gene20287|gene3328|gene10066|gene15039|gene6369|gene869|gene6366|gene6367|gene6363|gene15081|gene5323|gene25717|gene21210|gene870|gene4030|gene10187|gene13621|gene51…	152	gene3734|gene3528|gene695|gene28311|gene3115|gene7310|gene20449|gene15077|gene1997|gene820|gene11764|gene26381|gene10187|gene8387|gene12459|gene3903|gene2179|gene12454|gene15895|gene2092|gene1783|gene12102|gene2497|gene14730|gene4445|gene4117|gene16216|gene14753|gene3328|gene19201|gene6958|gene20428|gene2296|gene11287|gene22259	35	gene3715|gene12073|gene12056|gene1052|gene12401|gene13393|gene8391|gene11853|gene10020|gene15039|gene14688|gene8470|gene3385|gene11962|gene5423|gene28209|gene23580|gene2095|gene6368|gene6369|gene18986|gene6366|gene6367|gene25129|gene26284|gene13621|gene14284|gene572|gene10513|gene870|gene27007|gene510|gene6376|gene6373|gene18586|gene6371|gene4765|gene16241|gene6946|gene7195|gene15076|gene22880|ge…	117
extracellular vesicle	CC	GO:1903561	1.97627e-07	5.94409e-06	--	2571	gene17667|gene22130|gene2296|gene9951|gene2290|gene1240|gene1241|gene695|gene6358|gene8391|gene11962|gene17572|gene2119|gene14284|gene25373|gene12401|gene16216|gene2611|gene2521|gene6958|gene120|gene11853|gene8893|gene25807|gene20449|gene20287|gene3328|gene10066|gene15039|gene6369|gene869|gene6366|gene6367|gene6363|gene15081|gene5323|gene25717|gene21210|gene870|gene4030|gene10187|gene13621|gene51…	152	gene3734|gene3528|gene695|gene28311|gene3115|gene7310|gene20449|gene15077|gene1997|gene820|gene11764|gene26381|gene10187|gene8387|gene12459|gene3903|gene2179|gene12454|gene15895|gene2092|gene1783|gene12102|gene2497|gene14730|gene4445|gene4117|gene16216|gene14753|gene3328|gene19201|gene6958|gene20428|gene2296|gene11287|gene22259	35	gene3715|gene12073|gene12056|gene1052|gene12401|gene13393|gene8391|gene11853|gene10020|gene15039|gene14688|gene8470|gene3385|gene11962|gene5423|gene28209|gene23580|gene2095|gene6368|gene6369|gene18986|gene6366|gene6367|gene25129|gene26284|gene13621|gene14284|gene572|gene10513|gene870|gene27007|gene510|gene6376|gene6373|gene18586|gene6371|gene4765|gene16241|gene6946|gene7195|gene15076|gene22880|ge…	117
striated muscle thin filament	CC	GO:0005865	2.83319e-07	7.90461e-06	--	9	gene1185|gene26381|gene11877|gene11876|gene3903|gene22306	6	gene11877|gene3903|gene1185|gene22306|gene26381	5	gene11876	1
cell-cell junction	CC	GO:0005911	6.24265e-07	1.65876e-05	--	532	gene27828|gene3446|gene25284|gene5802|gene7918|gene3164|gene21678|gene3543|gene16241|gene4765|gene28221|gene20213|gene24698|gene12401|gene19173|gene9505|gene7357|gene11876|gene1715|gene1759|gene10351|gene3665|gene25292|gene19221|gene20444|gene12928|gene19201|gene10065|gene24912|gene26609|gene24882|gene12320|gene12735|gene13935|gene15897|gene25717|gene24430|gene11802|gene541|gene25201|gene25200|ge…	46	gene11802|gene26609|gene19201|gene24882|gene13935|gene9505|gene28221|gene3543|gene21678|gene7918|gene10351|gene25292|gene25284	13	gene3446|gene19221|gene1759|gene12401|gene11876|gene5802|gene19173|gene20213|gene27828|gene12928|gene7357|gene4765|gene12393|gene16241|gene10065|gene25204|gene25203|gene25202|gene541|gene25200|gene3164|gene25717|gene24698|gene15897|gene25201|gene3665|gene1715|gene24912|gene12735|gene12320|gene2062|gene24430|gene20444	33
Z disc	CC	GO:0030018	6.7727e-07	1.7178e-05	--	128	gene27088|gene4023|gene13187|gene4117|gene26668|gene15079|gene26667|gene11833|gene18498|gene3903|gene16601|gene26496|gene5452|gene23925|gene15000|gene10351|gene9783|gene9782|gene10319	19	gene9783|gene3903|gene15000|gene4117|gene27088|gene23925|gene5452|gene10319|gene26667|gene10351|gene9782|gene4023|gene26496|gene26668|gene18498	15	gene16601|gene11833|gene15079|gene13187	4
M band	CC	GO:0031430	1.12131e-06	2.72039e-05	--	22	gene4007|gene25271|gene27088|gene26837|gene27320|gene3903|gene10351|gene22306	8	gene3903|gene4007|gene27320|gene26837|gene27088|gene10351|gene22306|gene25271	8	--	0
myosin II complex	CC	GO:0016460	7.23346e-06	0.000168178	--	20	gene25271|gene25807|gene14730|gene18550|gene14753|gene3903|gene14749	7	gene14730|gene3903|gene14749|gene14753|gene25271	5	gene25807|gene18550	2
extracellular space	CC	GO:0005615	8.04126e-06	0.000179481	--	1270	gene16887|gene7768|gene20592|gene2119|gene12870|gene2122|gene781|gene2467|gene19052|gene18581|gene2196|gene15895|gene10836|gene21687|gene10508|gene24740|gene26784|gene10838|gene4765|gene7198|gene18012|gene11882|gene7895|gene21508|gene25130|gene6602|gene3829|gene7936|gene20081|gene27083|gene12406|gene23808|gene27227|gene24397|gene2611|gene2179|gene2869|gene25290|gene2092|gene5939|gene7310|gene6974…	82	gene19244|gene10385|gene13318|gene2869|gene7894|gene7895|gene3115|gene8382|gene12406|gene7310|gene820|gene26739|gene20592|gene27227|gene10508|gene2179|gene15895|gene7936|gene2092|gene1881|gene4445|gene28074|gene15761|gene20428|gene26784|gene25290|gene3829	27	gene5672|gene12870|gene18012|gene18010|gene3715|gene2122|gene24740|gene11962|gene25130|gene18586|gene5673|gene18580|gene18581|gene781|gene2290|gene17828|gene11459|gene2467|gene4765|gene510|gene24666|gene25129|gene19052|gene18011|gene9827|gene7198|gene24397|gene2119|gene24430|gene5944|gene5939|gene10836|gene23808|gene10838|gene6760|gene2611|gene20287|gene5679|gene25478|gene6974|gene11882|gene25294…	55
desmosome	CC	GO:0030057	8.82517e-06	0.000189402	--	28	gene27828|gene25717|gene25201|gene25200|gene25203|gene25202|gene25204|gene12735	8	--	0	gene25204|gene25203|gene25202|gene25201|gene25200|gene12735|gene25717|gene27828	8
cornified envelope	CC	GO:0001533	1.48483e-05	0.000306865	--	22	gene1250|gene1248|gene1263|gene1231|gene1224|gene1240|gene24397	7	gene1224	1	gene24397|gene1231|gene1263|gene1248|gene1250|gene1240	6
vesicle	CC	GO:0031982	1.97697e-05	0.000393981	GO:0031988	3591	gene17667|gene22130|gene12935|gene2296|gene9951|gene2290|gene1240|gene1241|gene695|gene6358|gene8391|gene11962|gene24397|gene20213|gene17572|gene2119|gene14284|gene25373|gene12401|gene16216|gene2611|gene2521|gene6958|gene120|gene11853|gene13430|gene8893|gene25807|gene17898|gene13389|gene20449|gene20287|gene3328|gene10066|gene15039|gene6369|gene869|gene6366|gene6367|gene12887|gene6363|gene15081|ge…	188	gene11388|gene3734|gene3528|gene695|gene11879|gene28311|gene3543|gene3115|gene7310|gene8387|gene15077|gene1997|gene820|gene12887|gene6958|gene26381|gene10187|gene12459|gene3903|gene12454|gene2179|gene15895|gene28221|gene2092|gene1783|gene12102|gene11764|gene2497|gene14730|gene5772|gene4445|gene4117|gene16216|gene28176|gene14753|gene3328|gene19201|gene15761|gene20449|gene20428|gene2296|gene11287|g…	45	gene3715|gene7357|gene1759|gene12056|gene9413|gene1052|gene12401|gene13393|gene8391|gene11853|gene21572|gene4448|gene20585|gene10020|gene26519|gene15039|gene14688|gene8470|gene3385|gene11962|gene5423|gene28209|gene23580|gene2095|gene6368|gene6369|gene18986|gene6366|gene6367|gene1822|gene13306|gene25129|gene13389|gene13621|gene14284|gene17898|gene572|gene26284|gene14356|gene10513|gene870|gene27007…	143
extracellular matrix component	CC	GO:0044420	2.78845e-05	0.000536536	--	123	gene4445|gene11287|gene25290|gene9403|gene2851|gene12935|gene27227|gene15761|gene11459|gene2156|gene2869|gene1868|gene1961|gene12459|gene4572|gene13515	16	gene12459|gene4445|gene13515|gene11287|gene2869|gene27227|gene15761|gene1961|gene9403|gene25290|gene2156|gene12935	12	gene11459|gene4572|gene1868|gene2851	4
muscle myosin complex	CC	GO:0005859	3.60062e-05	0.000669716	--	11	gene14753|gene25271|gene25807|gene14749|gene3903	5	gene14749|gene3903|gene14753|gene25271	4	gene25807	1
plasma membrane region	CC	GO:0098590	4.35614e-05	0.000784106	--	931	gene13393|gene12870|gene22256|gene2296|gene3164|gene15897|gene8391|gene28209|gene541|gene3543|gene13930|gene27088|gene7761|gene20213|gene12075|gene705|gene14284|gene9989|gene2814|gene14356|gene12401|gene20279|gene14025|gene19057|gene5951|gene15787|gene1759|gene10351|gene2095|gene22125|gene5772|gene25294|gene20136|gene1715|gene11857|gene11899|gene6118|gene1783|gene22756|gene4448|gene4445|gene12320…	62	gene5772|gene11899|gene4445|gene12962|gene15787|gene27088|gene22125|gene1783|gene1997|gene26609|gene22256|gene3543|gene2296|gene10351|gene7761|gene3283|gene20279|gene11857|gene10897	19	gene12870|gene510|gene9989|gene1759|gene1052|gene6118|gene12401|gene20213|gene13930|gene12075|gene21438|gene6906|gene13393|gene2814|gene3837|gene19057|gene705|gene11829|gene541|gene22756|gene3164|gene5951|gene28209|gene15897|gene2095|gene8391|gene3410|gene12719|gene3665|gene22642|gene1715|gene4010|gene12320|gene4448|gene6760|gene20136|gene14284|gene24430|gene5480|gene25419|gene25294|gene14025|gen…	43
extracellular region	CC	GO:0005576	6.10799e-05	0.00106508	--	1202	gene6045|gene2468|gene12974|gene8884|gene24984|gene2774|gene2467|gene12875|gene4885|gene24628|gene23182|gene12370|gene12459|gene7984|gene4445|gene23671|gene10752|gene10755|gene18009|gene25130|gene27184|gene27185|gene705|gene20081|gene28860|gene701|gene16216|gene4572|gene1203|gene441|gene6521|gene25290|gene3903|gene18584|gene18164|gene5598|gene11449|gene4168|gene20428|gene20444|gene5899|gene10385|…	75	gene12875|gene9403|gene2869|gene12370|gene11879|gene12359|gene11457|gene26739|gene701|gene4168|gene441|gene12459|gene18164|gene3903|gene22757|gene25007|gene10385|gene26609|gene25269|gene4445|gene2774|gene12974|gene27951|gene15761|gene20428|gene25290|gene16216|gene16337	28	gene6072|gene25592|gene6521|gene4885|gene14088|gene25130|gene8480|gene18584|gene18586|gene18580|gene18581|gene2468|gene19740|gene4572|gene2467|gene5598|gene24630|gene24984|gene28860|gene11001|gene705|gene18009|gene23182|gene19708|gene17771|gene1203|gene6045|gene5679|gene24235|gene16013|gene7984|gene27183|gene1868|gene10752|gene10755|gene23671|gene27184|gene27185|gene657|gene10758|gene11449|gene58…	47
collagen trimer	CC	GO:0005581	9.11812e-05	0.00154076	--	95	gene701|gene25269|gene2774|gene11001|gene20428|gene22757|gene26609|gene2179|gene10385|gene1868|gene4572|gene11882|gene12974	13	gene2774|gene22757|gene2179|gene20428|gene10385|gene701|gene26609|gene25269|gene12974	9	gene11882|gene4572|gene1868|gene11001	4
apicolateral plasma membrane	CC	GO:0016327	9.38817e-05	0.00154076	--	13	gene3543|gene1715|gene20213|gene25294|gene1759	5	gene3543	1	gene1715|gene20213|gene25294|gene1759	4
basolateral plasma membrane	CC	GO:0016323	0.000260643	0.0041554	--	194	gene15897|gene21438|gene12719|gene27088|gene6760|gene1715|gene14356|gene3164|gene11829|gene14025|gene12870|gene6118|gene5951|gene15787|gene1759|gene10351|gene3837|gene13930|gene2095	19	gene27088|gene10351|gene15787	3	gene11829|gene12870|gene1759|gene13930|gene21438|gene3164|gene5951|gene6760|gene1715|gene15897|gene2095|gene3837|gene14025|gene6118|gene12719|gene14356	16
actin-based cell projection	CC	GO:0098858	0.00027169	0.00420946	--	134	gene7765|gene12870|gene1759|gene820|gene25862|gene2611|gene11899|gene6118|gene24912|gene10187|gene5951|gene25419|gene26381|gene12320|gene11607	15	gene11899|gene820|gene11607|gene26381|gene10187|gene7765	6	gene12870|gene24912|gene25862|gene12320|gene5951|gene1759|gene6118|gene25419|gene2611	9
actin filament bundle	CC	GO:0032432	0.000279122	0.00420946	GO:0000141|GO:0030482	55	gene28221|gene26381|gene18550|gene24698|gene16601|gene2062|gene2512|gene28211|gene14730	9	gene28221|gene26381|gene14730	3	gene2512|gene24698|gene16601|gene2062|gene28211|gene18550	6
contractile fiber	CC	GO:0043292	0.000448523	0.00656001	--	36	gene6911|gene11359|gene1031|gene12401|gene4423|gene14752|gene6691	7	gene1031|gene14752|gene4423|gene6911|gene11359|gene6691	6	gene12401	1
basement membrane	CC	GO:0005604	0.000458495	0.00656001	--	84	gene25290|gene2851|gene12935|gene27227|gene15761|gene13515|gene2869|gene1961|gene12459|gene4572|gene2156	11	gene12459|gene13515|gene2869|gene27227|gene15761|gene1961|gene25290|gene2156|gene12935	9	gene4572|gene2851	2
myofibril	CC	GO:0030016	0.000667042	0.00930524	--	28	gene6911|gene11359|gene1031|gene4423|gene14752|gene6691	6	gene1031|gene14752|gene4423|gene6911|gene11359|gene6691	6	--	0
endoplasmic reticulum	CC	GO:0005783	0.000699778	0.00952381	--	848	gene6216|gene15290|gene22256|gene298|gene20444|gene16348|gene12337|gene16241|gene4572|gene27088|gene20047|gene20273|gene8382|gene1997|gene28860|gene19238|gene12401|gene28689|gene14284|gene2179|gene2156|gene6958|gene10096|gene20164|gene820|gene18580|gene441|gene20585|gene5423|gene5772|gene24804|gene19680|gene27324|gene11899|gene10929|gene3191|gene5392|gene8586|gene2497|gene13318|gene5887|gene4010|…	53	gene5772|gene1997|gene820|gene19238|gene13318|gene2179|gene27088|gene986|gene6216|gene22256|gene27324|gene6958|gene2156|gene8382|gene11899|gene2497|gene441	17	gene15290|gene10096|gene16348|gene21365|gene298|gene12401|gene18580|gene7048|gene10929|gene3191|gene4572|gene12337|gene28689|gene20585|gene28860|gene20273|gene8064|gene16241|gene6630|gene5392|gene2122|gene5887|gene20164|gene19680|gene5423|gene22642|gene1715|gene20047|gene4010|gene21572|gene24804|gene14284|gene5122|gene8586|gene25419|gene20444	36
brush border membrane	CC	GO:0031526	0.000873372	0.0116034	--	40	gene4010|gene3410|gene14284|gene8391|gene28209|gene25419|gene1052	7	--	0	gene4010|gene28209|gene14284|gene1052|gene8391|gene25419|gene3410	7
sarcolemma	CC	GO:0042383	0.00143488	0.01862	--	82	gene27088|gene7761|gene7136|gene15079|gene820|gene15897|gene22756|gene10351|gene9783|gene9402	10	gene820|gene7136|gene27088|gene10351|gene9783|gene7761	6	gene9402|gene15897|gene22756|gene15079	4
bicellular tight junction	CC	GO:0005923	0.00170804	0.0213724	--	113	gene20213|gene3446|gene28221|gene5802|gene19201|gene541|gene27828|gene7918|gene1715|gene3543|gene1759|gene3665	12	gene7918|gene19201|gene28221|gene3543	4	gene3446|gene20213|gene27828|gene541|gene1759|gene1715|gene5802|gene3665	8
cation-transporting ATPase complex	CC	GO:0090533	0.00176188	0.0213724	--	14	gene15897|gene28100|gene13930|gene2521	4	gene28100	1	gene13930|gene15897|gene2521	3
lamellar body	CC	GO:0042599	0.00176188	0.0213724	--	14	gene21508|gene18581|gene4441|gene6958	4	gene6958	1	gene21508|gene18581|gene4441	3
troponin complex	CC	GO:0005861	0.00190764	0.0222358	--	7	gene24528|gene22428|gene28933	3	gene24528|gene22428|gene28933	3	--	0
actomyosin	CC	GO:0042641	0.00191276	0.0222358	--	58	gene28221|gene26381|gene18550|gene9505|gene24698|gene16601|gene2062|gene14730	8	gene9505|gene28221|gene26381|gene14730	4	gene24698|gene16601|gene2062|gene18550	4
occluding junction	CC	GO:0070160	0.00198442	0.0225981	--	115	gene20213|gene3446|gene28221|gene5802|gene19201|gene541|gene27828|gene7918|gene1715|gene3543|gene1759|gene3665	12	gene7918|gene19201|gene28221|gene3543	4	gene3446|gene20213|gene27828|gene541|gene1759|gene1715|gene5802|gene3665	8
actin filament	CC	GO:0005884	0.00293872	0.0306157	--	62	gene28221|gene12870|gene2512|gene26381|gene6194|gene28211|gene11601|gene9782	8	gene28221|gene9782|gene26381	3	gene28211|gene6194|gene2512|gene12870|gene11601	5
serine C-palmitoyltransferase complex	CC	GO:0017059	0.00296281	0.0306157	--	8	gene3833|gene2357|gene16504	3	--	0	gene3833|gene16504|gene2357	3
stress fiber	CC	GO:0001725	0.0029599	0.0306157	--	49	gene28221|gene26381|gene18550|gene24698|gene16601|gene2062|gene14730	7	gene28221|gene26381|gene14730	3	gene24698|gene16601|gene2062|gene18550	4
contractile actin filament bundle	CC	GO:0097517	0.0029599	0.0306157	--	49	gene28221|gene26381|gene18550|gene24698|gene16601|gene2062|gene14730	7	gene28221|gene26381|gene14730	3	gene24698|gene16601|gene2062|gene18550	4
endoplasmic reticulum palmitoyltransferase complex	CC	GO:0031211	0.00296281	0.0306157	--	8	gene3833|gene2357|gene16504	3	--	0	gene3833|gene16504|gene2357	3
plasma membrane part	CC	GO:0044459	0.00374752	0.0379793	--	2625	gene23085|gene17667|gene2119|gene2296|gene2290|gene8391|gene11962|gene14531|gene27265|gene20213|gene11918|gene1997|gene12401|gene1460|gene14025|gene7357|gene12722|gene2521|gene11857|gene10351|gene24078|gene3665|gene10666|gene10065|gene6118|gene869|gene13930|gene3283|gene25717|gene5480|gene8313|gene25419|gene12719|gene510|gene22396|gene13393|gene28221|gene6043|gene22256|gene28100|gene3164|gene2167…	130	gene14870|gene3528|gene11918|gene27324|gene3543|gene3115|gene11857|gene11899|gene1997|gene28100|gene820|gene848|gene11764|gene10351|gene21678|gene24078|gene21826|gene20279|gene13200|gene10897|gene18913|gene1783|gene7136|gene28221|gene2092|gene15787|gene10385|gene26609|gene7761|gene3283|gene5772|gene4445|gene12962|gene27088|gene22125|gene13804|gene22256|gene26880|gene2296|gene25292|gene11263	41	gene6151|gene10430|gene1759|gene12050|gene1052|gene12401|gene5802|gene12722|gene2814|gene26519|gene19057|gene8470|gene11962|gene22756|gene5951|gene28209|gene2095|gene4813|gene8391|gene12719|gene3665|gene9105|gene6760|gene14284|gene24430|gene14356|gene15905|gene27007|gene11829|gene510|gene5944|gene1460|gene4284|gene13913|gene13393|gene8313|gene16241|gene10666|gene3164|gene4070|gene10752|gene10755|…	89
costamere	CC	GO:0043034	0.00381154	0.0379793	--	17	gene22756|gene15079|gene10351|gene27320	4	gene27320|gene10351	2	gene22756|gene15079	2
intermediate filament cytoskeleton	CC	GO:0045111	0.00416306	0.0407542	--	52	gene14682|gene15077|gene15076|gene19173|gene6359|gene3472|gene6376	7	gene15077|gene14682|gene6359|gene3472	4	gene6376|gene15076|gene19173	3
muscle tendon junction	CC	GO:0005927	0.00455241	0.0423374	--	3	gene27320|gene24882	2	gene27320|gene24882	2	--	0
septin cytoskeleton	CC	GO:0032156	0.00455241	0.0423374	--	3	gene11873|gene28176	2	gene28176	1	gene11873	1
SREBP-SCAP-Insig complex	CC	GO:0032937	0.00455241	0.0423374	--	3	gene4220|gene8645	2	--	0	gene8645|gene4220	2
calcium ion binding	MF	GO:0005509	1.79423e-11	1.94495e-08	--	745	gene1229|gene21365|gene11633|gene22130|gene12935|gene14688|gene1224|gene8419|gene3140|gene28211|gene4885|gene21826|gene10153|gene2190|gene23778|gene16489|gene27951|gene16946|gene26170|gene11388|gene4164|gene17357|gene27227|gene10187|gene15909|gene1460|gene26496|gene17898|gene20449|gene3903|gene13935|gene1231|gene13515|gene1277|gene5772|gene1233|gene2512|gene3075|gene20702|gene4423|gene1278|gene28…	70	gene11388|gene13515|gene986|gene13318|gene22428|gene28377|gene26496|gene12935|gene3075|gene29186|gene26003|gene13935|gene4164|gene8065|gene22256|gene10187|gene27227|gene21826|gene20702|gene3903|gene1224|gene17357|gene4423|gene9403|gene1905|gene18498|gene5772|gene2190|gene27951|gene27276|gene20449|gene23778|gene20956|gene10153|gene16489	35	gene16946|gene25592|gene18154|gene25202|gene4885|gene1233|gene15909|gene26772|gene21365|gene25204|gene28211|gene8419|gene120|gene25201|gene22130|gene19740|gene26519|gene14688|gene379|gene1460|gene3140|gene25203|gene1229|gene11633|gene25200|gene1231|gene19|gene22642|gene1278|gene2512|gene26170|gene4030|gene4010|gene1277|gene17898	35
structural constituent of muscle	MF	GO:0008307	9.465e-10	5.13003e-07	--	31	gene25271|gene6911|gene25807|gene4117|gene15079|gene26837|gene3903|gene16601|gene23925|gene15000|gene9783|gene14749	12	gene3903|gene15000|gene4117|gene14749|gene23925|gene26837|gene9783|gene6911|gene25271	9	gene25807|gene16601|gene15079	3
actin binding	MF	GO:0003779	9.19998e-08	3.32426e-05	--	226	gene12870|gene7765|gene14749|gene23643|gene26668|gene26667|gene9505|gene24698|gene1460|gene3903|gene10319|gene5837|gene2512|gene14753|gene16601|gene24912|gene24882|gene28211|gene12320|gene22428|gene24430|gene11802|gene11459|gene14111|gene19261|gene6194|gene14356|gene3878	28	gene11802|gene5837|gene3903|gene14749|gene24882|gene14753|gene10319|gene22428|gene26667|gene7765|gene9505|gene14111|gene26668|gene23643	14	gene6194|gene2512|gene12870|gene19261|gene11459|gene24912|gene3878|gene1460|gene24698|gene12320|gene24430|gene16601|gene28211|gene14356	14
transferase activity, transferring amino-acyl groups	MF	GO:0016755	7.14272e-07	0.000175392	--	15	gene16945|gene16946|gene21789|gene21790|gene5899|gene8084|gene11674	7	--	0	gene16946|gene16945|gene8084|gene21789|gene21790|gene5899|gene11674	7
cytoskeletal protein binding	MF	GO:0008092	8.09006e-07	0.000175392	--	554	gene27088|gene1185|gene12870|gene11709|gene7765|gene11877|gene7984|gene14749|gene359|gene4023|gene23643|gene25294|gene26668|gene26667|gene17357|gene9505|gene24698|gene1460|gene11876|gene3903|gene10351|gene9783|gene9782|gene10319|gene5837|gene28234|gene2512|gene6911|gene14753|gene16601|gene24912|gene24882|gene28211|gene26284|gene24528|gene12320|gene22428|gene24430|gene11802|gene22756|gene11459|gen…	47	gene11709|gene22428|gene28234|gene4023|gene11877|gene14749|gene10319|gene10351|gene22306|gene14111|gene1185|gene23643|gene11802|gene5837|gene3903|gene17357|gene24528|gene26667|gene9783|gene9782|gene9505|gene26668|gene359|gene24882|gene14753|gene27088|gene6911|gene7765	28	gene6194|gene22756|gene2512|gene12870|gene19261|gene11459|gene16601|gene24912|gene3878|gene1460|gene24698|gene12320|gene26284|gene24430|gene14356|gene25294|gene11876|gene28211|gene7984	19
actin filament binding	MF	GO:0051015	8.72867e-06	0.00157698	--	100	gene22428|gene7765|gene12870|gene2512|gene24912|gene16601|gene14753|gene3903|gene1460|gene14111|gene28211|gene14356|gene12320|gene14749|gene3878	15	gene3903|gene14749|gene22428|gene14753|gene14111|gene7765	6	gene2512|gene12870|gene3878|gene24912|gene1460|gene12320|gene16601|gene28211|gene14356	9
tropomyosin binding	MF	GO:0005523	1.04929e-05	0.0016249	--	9	gene22306|gene11877|gene11876|gene1185|gene16601	5	gene1185|gene11877|gene22306	3	gene16601|gene11876	2
ATPase activity, coupled to movement of substances	MF	GO:0043492	1.99345e-05	0.00270113	--	189	gene2138|gene5323|gene12073|gene17667|gene22642|gene7136|gene15577|gene20155|gene15576|gene14025|gene8391|gene2521|gene447|gene15897|gene5951|gene11899|gene25419|gene10096|gene15578|gene13930|gene4441	21	gene7136|gene11899	2	gene22642|gene2138|gene2521|gene4441|gene13930|gene25419|gene10096|gene12073|gene5951|gene15578|gene15897|gene15576|gene15577|gene5323|gene447|gene8391|gene17667|gene20155|gene14025	19
transferase activity, transferring acyl groups	MF	GO:0016746	2.26376e-05	0.00272657	GO:0008415	251	gene4546|gene2357|gene16945|gene16946|gene5423|gene12337|gene20047|gene20273|gene16238|gene21789|gene28689|gene20585|gene298|gene24804|gene19680|gene8084|gene11674|gene16504|gene5302|gene5122|gene21790|gene22205|gene5899|gene27684|gene27683	25	--	0	gene16946|gene16945|gene2357|gene21790|gene298|gene21789|gene12337|gene16504|gene5423|gene20585|gene20273|gene22205|gene27684|gene11674|gene27683|gene4546|gene19680|gene28689|gene16238|gene20047|gene8084|gene5302|gene5899|gene24804|gene5122	25
xanthine dehydrogenase activity	MF	GO:0004854	6.14242e-05	0.00605307	--	3	gene5939|gene4319|gene4321	3	--	0	gene4321|gene5939|gene4319	3
oxidoreductase activity, acting on CH or CH2 groups, NAD or NADP as acceptor	MF	GO:0016726	6.14242e-05	0.00605307	--	3	gene5939|gene4319|gene4321	3	--	0	gene4321|gene5939|gene4319	3
O-acyltransferase activity	MF	GO:0008374	9.52645e-05	0.00860556	--	59	gene4546|gene20585|gene5302|gene16238|gene5122|gene19680|gene28689|gene22205|gene27684|gene27683	10	--	0	gene16238|gene27684|gene5302|gene27683|gene4546|gene20585|gene5122|gene19680|gene28689|gene22205	10
microfilament motor activity	MF	GO:0000146	0.000121692	0.0101473	--	21	gene14730|gene18550|gene25373|gene14753|gene12320|gene14749	6	gene14749|gene14753|gene14730	3	gene25373|gene12320|gene18550	3
carbonate dehydratase activity	MF	GO:0004089	0.000141293	0.0109401	--	14	gene13604|gene13605|gene13607|gene16013|gene14284	5	gene13605	1	gene13607|gene13604|gene14284|gene16013	4
ATPase activity, coupled to transmembrane movement of substances	MF	GO:0042626	0.000164724	0.011904	GO:0016820	172	gene2521|gene5323|gene12073|gene17667|gene22642|gene2138|gene15577|gene20155|gene15576|gene14025|gene8391|gene447|gene4441|gene15897|gene5951|gene13930|gene15578|gene7136	18	gene7136	1	gene22642|gene2138|gene2521|gene4441|gene13930|gene12073|gene5951|gene15578|gene15897|gene15576|gene15577|gene5323|gene447|gene8391|gene17667|gene20155|gene14025	17
fatty acid elongase activity	MF	GO:0009922	0.000259819	0.0122454	--	9	gene24804|gene298|gene12337|gene20273	4	--	0	gene24804|gene12337|gene20273|gene298	4
3-oxo-lignoceronyl-CoA synthase activity	MF	GO:0102338	0.000259819	0.0122454	--	9	gene24804|gene298|gene12337|gene20273	4	--	0	gene24804|gene12337|gene20273|gene298	4
protein-glutamine gamma-glutamyltransferase activity	MF	GO:0003810	0.000259819	0.0122454	--	9	gene21789|gene16945|gene16946|gene21790	4	--	0	gene16946|gene16945|gene21790|gene21789	4
3-oxo-arachidoyl-CoA synthase activity	MF	GO:0102336	0.000259819	0.0122454	--	9	gene24804|gene298|gene12337|gene20273	4	--	0	gene24804|gene12337|gene20273|gene298	4
3-oxo-cerotoyl-CoA synthase activity	MF	GO:0102337	0.000259819	0.0122454	--	9	gene24804|gene298|gene12337|gene20273	4	--	0	gene24804|gene12337|gene20273|gene298	4
structural molecule activity	MF	GO:0005198	0.000211754	0.0122454	--	1439	gene1229|gene15048|gene15049|gene22259|gene1263|gene1714|gene26837|gene15046|gene15069|gene15040|gene15041|gene1240|gene4512|gene6359|gene6358|gene10153|gene23925|gene28181|gene6376|gene6375|gene12459|gene6373|gene6366|gene6371|gene25284|gene27088|gene6911|gene24430|gene10799|gene16589|gene7918|gene14749|gene1233|gene1460|gene15000|gene12974|gene15045|gene2092|gene27813|gene10351|gene6370|gene978…	84	gene27813|gene6359|gene25271|gene25290|gene15077|gene14749|gene23925|gene1395|gene10351|gene701|gene25284|gene11802|gene12459|gene3903|gene6911|gene10153|gene26837|gene9783|gene9403|gene6365|gene25269|gene4117|gene12974|gene27088|gene15000|gene7918|gene2092|gene22259	28	gene1233|gene6358|gene1460|gene1714|gene1715|gene6379|gene6378|gene6369|gene6376|gene6375|gene6373|gene28181|gene6371|gene6370|gene15076|gene15075|gene15074|gene15072|gene15071|gene16589|gene4572|gene15079|gene4512|gene1263|gene15037|gene15051|gene15050|gene15039|gene1240|gene1229|gene10799|gene22756|gene16601|gene6368|gene6383|gene6380|gene4813|gene6366|gene6367|gene25807|gene12719|gene6363|gene…	56
structural molecule activity conferring elasticity	MF	GO:0097493	0.000238441	0.0122454	--	4	gene3903|gene25269|gene9403	3	gene25269|gene3903|gene9403	3	--	0
fatty acid ligase activity	MF	GO:0015645	0.00020506	0.0122454	--	15	gene25847|gene25852|gene24876|gene21572|gene9402	5	--	0	gene25852|gene24876|gene21572|gene9402|gene25847	5
primary active transmembrane transporter activity	MF	GO:0015399	0.00033234	0.0144103	--	182	gene2138|gene5323|gene12073|gene17667|gene22642|gene15577|gene20155|gene15576|gene14025|gene8391|gene2521|gene447|gene15897|gene5951|gene7136|gene13930|gene15578|gene4441	18	gene7136	1	gene22642|gene2138|gene2521|gene4441|gene13930|gene12073|gene5951|gene15578|gene15897|gene15576|gene15577|gene5323|gene447|gene8391|gene17667|gene20155|gene14025	17
P-P-bond-hydrolysis-driven transmembrane transporter activity	MF	GO:0015405	0.00033234	0.0144103	--	182	gene2138|gene5323|gene12073|gene17667|gene22642|gene15577|gene20155|gene15576|gene14025|gene8391|gene2521|gene447|gene15897|gene5951|gene7136|gene13930|gene15578|gene4441	18	gene7136	1	gene22642|gene2138|gene2521|gene4441|gene13930|gene12073|gene5951|gene15578|gene15897|gene15576|gene15577|gene5323|gene447|gene8391|gene17667|gene20155|gene14025	17
extracellular matrix structural constituent	MF	GO:0005201	0.000406841	0.0169621	--	70	gene701|gene25269|gene25290|gene12974|gene10153|gene2092|gene10799|gene12459|gene4572|gene9403	10	gene12459|gene10153|gene12974|gene25290|gene2092|gene9403|gene701|gene25269	8	gene4572|gene10799	2
transcriptional repressor activity, RNA polymerase II transcription regulatory region sequence-specific DNA binding	MF	GO:0001227	0.000434376	0.0174394	--	155	gene8133|gene1017|gene1474|gene5513|gene6628|gene17964|gene16693|gene20170|gene4154|gene2169|gene3045|gene10367|gene13953|gene22300|gene13941|gene12525	16	gene10367|gene16693|gene6628|gene4154|gene17964|gene1017|gene13953	7	gene8133|gene3045|gene22300|gene1474|gene12525|gene20170|gene2169|gene13941|gene5513	9
aldehyde oxidase activity	MF	GO:0004031	0.000578536	0.0216253	--	5	gene4323|gene4319|gene4321	3	--	0	gene4323|gene4321|gene4319	3
telethonin binding	MF	GO:0031433	0.000578536	0.0216253	--	5	gene3903|gene26667|gene10319	3	gene10319|gene26667|gene3903	3	--	0
alpha-actinin binding	MF	GO:0051393	0.000696074	0.0251515	GO:0051372	19	gene3903|gene4023|gene9783|gene9782|gene24882	5	gene9783|gene24882|gene3903|gene9782|gene4023	5	--	0
protein complex binding	MF	GO:0032403	0.000769198	0.0268971	--	479	gene8796|gene20592|gene12870|gene2133|gene21687|gene11962|gene14749|gene7765|gene27227|gene4572|gene24698|gene1460|gene13892|gene3903|gene9105|gene2512|gene820|gene11263|gene14753|gene16601|gene24912|gene28211|gene17771|gene4445|gene12320|gene15081|gene22428|gene1395|gene23580|gene454|gene14111|gene14356|gene12670|gene3878	34	gene4445|gene3903|gene22428|gene14749|gene14753|gene1395|gene20592|gene13892|gene27227|gene820|gene14111|gene11263|gene7765	13	gene454|gene11962|gene2512|gene12870|gene15081|gene8796|gene2133|gene3878|gene12670|gene1460|gene24698|gene21687|gene23580|gene24912|gene12320|gene4572|gene17771|gene9105|gene16601|gene28211|gene14356	21
metal ion binding	MF	GO:0046872	0.000892305	0.0302268	--	4839	gene8414|gene8410|gene22130|gene12935|gene2290|gene8419|gene16693|gene695|gene25847|gene23925|gene6516|gene973|gene16945|gene4048|gene16197|gene2119|gene379|gene21704|gene19238|gene8470|gene16216|gene19173|gene3103|gene2959|gene19274|gene11857|gene5939|gene13935|gene8157|gene12525|gene29186|gene6521|gene6051|gene10666|gene20449|gene3075|gene4423|gene10065|gene986|gene10454|gene26772|gene22428|gen…	230	gene4023|gene11857|gene4103|gene29186|gene13505|gene23925|gene12962|gene5452|gene14682|gene21678|gene20279|gene1612|gene2156|gene2497|gene20670|gene22946|gene13515|gene8157|gene13318|gene695|gene28377|gene3569|gene17964|gene8107|gene12935|gene3075|gene16632|gene359|gene4164|gene19470|gene27227|gene20702|gene13361|gene3194|gene3903|gene27150|gene21339|gene23803|gene18498|gene9396|gene22125|gene279…	100	gene26986|gene12525|gene21365|gene9413|gene25232|gene12356|gene28211|gene12722|gene19740|gene26519|gene28860|gene14688|gene379|gene1460|gene3816|gene23223|gene19274|gene3140|gene25203|gene8419|gene11633|gene25200|gene8414|gene8410|gene18986|gene24330|gene3665|gene25847|gene21790|gene5899|gene14284|gene20574|gene17898|gene10513|gene25592|gene18154|gene389|gene4885|gene25190|gene24740|gene10454|gen…	130
aminopeptidase activity	MF	GO:0004177	0.00101775	0.0334316	--	41	gene21508|gene23786|gene27324|gene14444|gene10368|gene11142|gene10513	7	gene10368|gene27324|gene23786|gene11142	4	gene10513|gene14444|gene21508	3
oxidoreductase activity, acting on the aldehyde or oxo group of donors, oxygen as acceptor	MF	GO:0016623	0.00112304	0.0358052	--	6	gene4323|gene4319|gene4321	3	--	0	gene4323|gene4321|gene4319	3
extracellular matrix constituent conferring elasticity	MF	GO:0030023	0.00155842	0.0426789	--	2	gene25269|gene9403	2	gene25269|gene9403	2	--	0
structural constituent of epidermis	MF	GO:0030280	0.00155842	0.0426789	--	2	gene6376|gene15076	2	--	0	gene6376|gene15076	2
troponin T binding	MF	GO:0031014	0.00155842	0.0426789	--	2	gene24528|gene17357	2	gene17357|gene24528	2	--	0
flavin adenine dinucleotide binding	MF	GO:0050660	0.00157487	0.0426789	--	83	gene15922|gene13166|gene4323|gene27007|gene4321|gene15883|gene19261|gene4319|gene5939|gene6946	10	--	0	gene27007|gene13166|gene19261|gene6946|gene4323|gene4321|gene15883|gene15922|gene4319|gene5939	10
acyl-CoA ligase activity	MF	GO:0003996	0.00155842	0.0426789	--	2	gene25847|gene25852	2	--	0	gene25852|gene25847	2
motor activity	MF	GO:0003774	0.00143347	0.0426789	--	157	gene6568|gene25807|gene11359|gene18550|gene25373|gene27424|gene14749|gene14753|gene14752|gene14111|gene14356|gene22217|gene12320|gene11709|gene14730	15	gene14749|gene11709|gene14753|gene14752|gene11359|gene14111|gene22217|gene14730	8	gene12320|gene27424|gene6568|gene18550|gene25373|gene25807|gene14356	7
heparin binding	MF	GO:0008201	0.00173096	0.0457648	--	160	gene4445|gene17572|gene3829|gene12935|gene8382|gene1881|gene2196|gene11459|gene26609|gene12370|gene29186|gene17771|gene1961|gene12670|gene10385	15	gene4445|gene29186|gene10385|gene1961|gene12370|gene1881|gene3829|gene8382|gene26609|gene12935	10	gene11459|gene17771|gene12670|gene2196|gene17572	5
interleukin-1 receptor activity	MF	GO:0004908	0.00190764	0.0492352	--	7	gene6045|gene6041|gene6043	3	--	0	gene6041|gene6043|gene6045	3
cation binding	MF	GO:0043169	0.00197105	0.0496888	--	4911	gene8414|gene8410|gene22130|gene12935|gene2290|gene8419|gene16693|gene695|gene25847|gene23925|gene6516|gene973|gene16945|gene4048|gene16197|gene2119|gene379|gene21704|gene19238|gene8470|gene16216|gene19173|gene3103|gene2959|gene19274|gene11857|gene5939|gene13935|gene8157|gene12525|gene29186|gene6521|gene6051|gene10666|gene20449|gene3075|gene4423|gene10065|gene986|gene10454|gene26772|gene22428|gen…	230	gene4023|gene11857|gene4103|gene29186|gene13505|gene23925|gene12962|gene5452|gene14682|gene21678|gene20279|gene1612|gene2156|gene2497|gene20670|gene22946|gene13515|gene8157|gene13318|gene695|gene28377|gene3569|gene17964|gene8107|gene12935|gene3075|gene16632|gene359|gene4164|gene19470|gene27227|gene20702|gene13361|gene3194|gene3903|gene27150|gene21339|gene23803|gene18498|gene9396|gene22125|gene279…	100	gene26986|gene12525|gene21365|gene9413|gene25232|gene12356|gene28211|gene12722|gene19740|gene26519|gene28860|gene14688|gene379|gene1460|gene3816|gene23223|gene19274|gene3140|gene25203|gene8419|gene11633|gene25200|gene8414|gene8410|gene18986|gene24330|gene3665|gene25847|gene21790|gene5899|gene14284|gene20574|gene17898|gene10513|gene25592|gene18154|gene389|gene4885|gene25190|gene24740|gene10454|gen…	130
